# Supplementary material for: A multi-year experiment shows that lower precipitation predictability encourages plants’ early life stages and enhances population viability
Source: PeerJ. 2019 Mar 8;7:e6443. doi: 10.7717/peerj.6443 (PMC6410692; doi:10.7717/peerj.6443)
Supplement: Supplemental Information 6 — Raw data applied for data analyses and preparation for Results, Figures, and Tables. [file peerj-07-6443-s006.xlsx]

## Sheet: g0_o
PLOT	YEAR	E.	L.	EMERG	E_SURV	L_SURV	REP_RAT
1	2012	L	M	1	1	1	0
1	2012	L	M	1	1
1	2012	L	M	1	1
1	2012	L	M	1	1
1	2012	L	M	1	1	1	0
1	2012	L	M	1	0
1	2012	L	M	1	1	1	0
1	2012	L	M	1	1
1	2012	L	M	0
1	2012	L	M	1	1
1	2012	L	M	1	1	1	0
1	2012	L	M	1	1
1	2012	L	M	1	1
1	2012	L	M	1	1	1	1
1	2012	L	M	1	1
1	2012	L	M	1	1
1	2012	L	M	1	1
1	2012	L	M	1	1	1	0
1	2012	L	M	1	1	1	0
1	2012	L	M	1	1
1	2012	L	M	0
1	2012	L	M	1	1
1	2012	L	M	0
1	2012	L	M	1	1	1	0
1	2012	L	M	0
1	2012	L	M	1	1	1	0
1	2012	L	M	1	0
1	2012	L	M	0
1	2012	L	M	0
1	2012	L	M	1	1	1	0
1	2012	L	M	1	1
1	2012	L	M	1	1
1	2012	L	M	1	1	1	0
1	2012	L	M	1	1	1	0
1	2012	L	M	0
1	2012	L	M	1	1
1	2012	L	M	1	1
1	2012	L	M	1	1
1	2012	L	M	1	1	1	0
1	2012	L	M	1	1
1	2012	L	M	1	1	1	1
1	2012	L	M	0
1	2012	L	M	1	0
1	2012	L	M	1	1	1	1
1	2012	L	M	0
1	2012	L	M	1	1
1	2012	L	M	1	1	1	0
1	2012	L	M	1	0
1	2012	L	M	1	1
1	2012	L	M	1	1	1	1
1	2012	L	M	0
1	2012	L	M	1	1
1	2012	L	M	0
1	2012	L	M	1	1	1	0
1	2012	L	M	1	1	1	1
1	2012	L	M	0
1	2012	L	M	0
1	2012	L	M	1	1	1	0
1	2012	L	M	0
1	2012	L	M	1	1
1	2012	L	M	1	1	1	0
1	2012	L	M	0
1	2012	L	M	1	1
1	2012	L	M	1	1
1	2012	L	M	1	1	1	0
1	2012	L	M	1	1
1	2012	L	M	1	0
1	2012	L	M	1	1
1	2012	L	M	1	1	1	1
1	2012	L	M	0
1	2012	L	M	0
1	2012	L	M	1	1	1	0
1	2012	L	M	1	1
1	2012	L	M	1	1	1	0
1	2012	L	M	1	1
1	2012	L	M	1	1
1	2012	L	M	1	1	1	0
1	2012	L	M	0
1	2012	L	M	0
1	2012	L	M	1	1	1	1
1	2012	L	M	1	0
1	2012	L	M	1	1
1	2012	L	M	0
1	2012	L	M	1	1	1	0
2	2012	L	M	1	1	1	1
2	2012	L	M	0
2	2012	L	M	0
2	2012	L	M	0
2	2012	L	M	0
2	2012	L	M	1	0
2	2012	L	M	1	0
2	2012	L	M	1	1
2	2012	L	M	1	1	1	0
2	2012	L	M	0
2	2012	L	M	0
2	2012	L	M	1	0
2	2012	L	M	1	0
2	2012	L	M	0
2	2012	L	M	0
2	2012	L	M	1	1
2	2012	L	M	1	0
2	2012	L	M	1	1	1	1
2	2012	L	M	0
2	2012	L	M	0
2	2012	L	M	0
2	2012	L	M	0
2	2012	L	M	0
2	2012	L	M	0
2	2012	L	M	1	1	1	0
2	2012	L	M	0
2	2012	L	M	0
2	2012	L	M	1	0
2	2012	L	M	0
2	2012	L	M	0
2	2012	L	M	0
2	2012	L	M	0
2	2012	L	M	0
2	2012	L	M	0
2	2012	L	M	0
2	2012	L	M	0
2	2012	L	M	1	0
2	2012	L	M	0
2	2012	L	M	0
2	2012	L	M	0
2	2012	L	M	0
2	2012	L	M	0
2	2012	L	M	0
2	2012	L	M	0
2	2012	L	M	0
2	2012	L	M	0
2	2012	L	M	0
2	2012	L	M	0
2	2012	L	M	0
2	2012	L	M	1	1	1	0
2	2012	L	M	0
2	2012	L	M	0
2	2012	L	M	0
2	2012	L	M	1	1	1	0
2	2012	L	M	0
2	2012	L	M	0
2	2012	L	M	0
2	2012	L	M	1	1
2	2012	L	M	0
2	2012	L	M	1	1	1	0
2	2012	L	M	0
2	2012	L	M	1	1	1	0
2	2012	L	M	1	1
2	2012	L	M	1	1
2	2012	L	M	0
2	2012	L	M	1	1	1	0
2	2012	L	M	0
2	2012	L	M	1	0
2	2012	L	M	0
2	2012	L	M	0
2	2012	L	M	1	1	1	0
2	2012	L	M	0
2	2012	L	M	0
2	2012	L	M	0
2	2012	L	M	1	1	1	0
2	2012	L	M	0
2	2012	L	M	1	1	1	1
2	2012	L	M	1	1
2	2012	L	M	1	1
2	2012	L	M	1	1
2	2012	L	M	1	1	1	0
2	2012	L	M	0
2	2012	L	M	1	1	1	0
2	2012	L	M	0
3	2012	M	L	1	1	1	0
3	2012	M	L	0
3	2012	M	L	1	0
3	2012	M	L	0
3	2012	M	L	1	0
3	2012	M	L	0
3	2012	M	L	1	0
3	2012	M	L	0
3	2012	M	L	0
3	2012	M	L	1	1	1	1
3	2012	M	L	0
3	2012	M	L	1	1
3	2012	M	L	0
3	2012	M	L	0
3	2012	M	L	1	1	1	0
3	2012	M	L	1	0
3	2012	M	L	1	0
3	2012	M	L	1	1	1	0
3	2012	M	L	1	0
3	2012	M	L	0
3	2012	M	L	0
3	2012	M	L	1	1	1	1
3	2012	M	L	0
3	2012	M	L	0
3	2012	M	L	1	1	1	1
3	2012	M	L	0
3	2012	M	L	0
3	2012	M	L	0
3	2012	M	L	0
3	2012	M	L	1	1	1	0
3	2012	M	L	1	0
3	2012	M	L	0
3	2012	M	L	0
3	2012	M	L	1	1	1	1
3	2012	M	L	1	0
3	2012	M	L	0
3	2012	M	L	0
3	2012	M	L	1	0
3	2012	M	L	1	0
3	2012	M	L	1	0
3	2012	M	L	0
3	2012	M	L	0
3	2012	M	L	0
3	2012	M	L	1	0
3	2012	M	L	0
3	2012	M	L	1	1	1	1
3	2012	M	L	0
3	2012	M	L	1	1
3	2012	M	L	1	1	1	0
3	2012	M	L	1	0
3	2012	M	L	0
3	2012	M	L	0
3	2012	M	L	0
3	2012	M	L	0
3	2012	M	L	1	1	1	0
3	2012	M	L	0
3	2012	M	L	1	1
3	2012	M	L	1	0
3	2012	M	L	1	0
3	2012	M	L	1	0
3	2012	M	L	1	0
3	2012	M	L	1	1	1	0
3	2012	M	L	1	0
3	2012	M	L	1	0
3	2012	M	L	1	1	1	1
3	2012	M	L	1	0
3	2012	M	L	0
3	2012	M	L	0
3	2012	M	L	0
3	2012	M	L	0
3	2012	M	L	1	0
3	2012	M	L	0
3	2012	M	L	0
3	2012	M	L	1	1	1	1
3	2012	M	L	1	1
3	2012	M	L	1	1
3	2012	M	L	1	1	1	1
3	2012	M	L	1	1
3	2012	M	L	1	1	1	0
3	2012	M	L	1	1
3	2012	M	L	1	0
3	2012	M	L	1	1	1	0
3	2012	M	L	1	1
3	2012	M	L	1	0
4	2012	M	L	1	1
4	2012	M	L	1	1	1	0
4	2012	M	L	0
4	2012	M	L	1	1	1	1
4	2012	M	L	1	0
4	2012	M	L	1	0
4	2012	M	L	1	1	1	1
4	2012	M	L	1	0
4	2012	M	L	1	0
4	2012	M	L	0
4	2012	M	L	1	0
4	2012	M	L	1	1	1	0
4	2012	M	L	1	1
4	2012	M	L	1	1	1	0
4	2012	M	L	0
4	2012	M	L	0
4	2012	M	L	0
4	2012	M	L	0
4	2012	M	L	0
4	2012	M	L	0
4	2012	M	L	0
4	2012	M	L	1	0
4	2012	M	L	1	1	1	0
4	2012	M	L	1	1
4	2012	M	L	1	1	1	0
4	2012	M	L	0
4	2012	M	L	0
4	2012	M	L	1	1	1	0
4	2012	M	L	0
4	2012	M	L	0
4	2012	M	L	0
4	2012	M	L	0
4	2012	M	L	1	1	1	0
4	2012	M	L	1	0
4	2012	M	L	1	1
4	2012	M	L	1	1	1	0
4	2012	M	L	1	1	1	0
4	2012	M	L	0
4	2012	M	L	1	0
4	2012	M	L	0
4	2012	M	L	1	0
4	2012	M	L	1	1	1	1
4	2012	M	L	1	1	1	1
4	2012	M	L	0
4	2012	M	L	0
4	2012	M	L	0
4	2012	M	L	0
4	2012	M	L	0
4	2012	M	L	1	1	1	1
4	2012	M	L	0
4	2012	M	L	1	1
4	2012	M	L	1	1	1	0
4	2012	M	L	0
4	2012	M	L	1	0
4	2012	M	L	0
4	2012	M	L	1	0
4	2012	M	L	1	1	1	0
4	2012	M	L	1	1
4	2012	M	L	1	1	1	0
4	2012	M	L	0
4	2012	M	L	1	1	1	0
4	2012	M	L	0
4	2012	M	L	1	0
4	2012	M	L	0
4	2012	M	L	1	1	1	0
4	2012	M	L	0
4	2012	M	L	0
4	2012	M	L	1	1	1	1
4	2012	M	L	0
4	2012	M	L	1	1	1	0
4	2012	M	L	0
4	2012	M	L	1	1
4	2012	M	L	0
4	2012	M	L	1	1	1	0
4	2012	M	L	1	0
4	2012	M	L	1	0
4	2012	M	L	0
4	2012	M	L	1	1	1	0
4	2012	M	L	0
4	2012	M	L	0
4	2012	M	L	0
4	2012	M	L	0
4	2012	M	L	0
4	2012	M	L	0
5	2012	M	L	0
5	2012	M	L	1	1	1	0
5	2012	M	L	1	1
5	2012	M	L	1	1	1	0
5	2012	M	L	0
5	2012	M	L	1	0
5	2012	M	L	0
5	2012	M	L	1	1	1	0
5	2012	M	L	0
5	2012	M	L	0
5	2012	M	L	0
5	2012	M	L	0
5	2012	M	L	0
5	2012	M	L	0
5	2012	M	L	1	1	1	0
5	2012	M	L	0
5	2012	M	L	0
5	2012	M	L	1	0
5	2012	M	L	1	0
5	2012	M	L	0
5	2012	M	L	1	1	1	0
5	2012	M	L	1	0
5	2012	M	L	1	1	1	0
5	2012	M	L	1	1
5	2012	M	L	0
5	2012	M	L	1	1	1	1
5	2012	M	L	1	0
5	2012	M	L	0
5	2012	M	L	1	1
5	2012	M	L	1	1	1	0
5	2012	M	L	0
5	2012	M	L	0
5	2012	M	L	1	0
5	2012	M	L	0
5	2012	M	L	1	0
5	2012	M	L	0
5	2012	M	L	1	1	1	0
5	2012	M	L	1	0
5	2012	M	L	0
5	2012	M	L	0
5	2012	M	L	0
5	2012	M	L	1	1	1	0
5	2012	M	L	0
5	2012	M	L	1	1	1	0
5	2012	M	L	0
5	2012	M	L	0
5	2012	M	L	1	1
5	2012	M	L	1	1	1	0
5	2012	M	L	0
5	2012	M	L	1	1	1	0
5	2012	M	L	0
5	2012	M	L	0
5	2012	M	L	0
5	2012	M	L	1	1	1	0
5	2012	M	L	0
5	2012	M	L	1	0
5	2012	M	L	1	1	1	1
5	2012	M	L	0
5	2012	M	L	0
5	2012	M	L	1	1	1	0
5	2012	M	L	0
5	2012	M	L	0
5	2012	M	L	0
5	2012	M	L	1	1	1	1
5	2012	M	L	0
5	2012	M	L	1	0
5	2012	M	L	1	1	1	1
5	2012	M	L	0
5	2012	M	L	1	0
5	2012	M	L	1	0
5	2012	M	L	0
5	2012	M	L	0
5	2012	M	L	0
5	2012	M	L	1	1
5	2012	M	L	1	1	1	0
5	2012	M	L	1	1
5	2012	M	L	1	1	1	0
5	2012	M	L	0
5	2012	M	L	0
5	2012	M	L	1	1
5	2012	M	L	1	1	1	0
5	2012	M	L	0
5	2012	M	L	0
5	2012	M	L	1	0
6	2012	M	L	0
6	2012	M	L	0
6	2012	M	L	1	1	1	0
6	2012	M	L	1	1	1	0
6	2012	M	L	0
6	2012	M	L	0
6	2012	M	L	0
6	2012	M	L	0
6	2012	M	L	1	1	1	0
6	2012	M	L	1	1
6	2012	M	L	0
6	2012	M	L	1	1	1	0
6	2012	M	L	0
6	2012	M	L	1	0
6	2012	M	L	0
6	2012	M	L	1	1
6	2012	M	L	0
6	2012	M	L	1	1	1	0
6	2012	M	L	0
6	2012	M	L	0
6	2012	M	L	0
6	2012	M	L	0
6	2012	M	L	0
6	2012	M	L	0
6	2012	M	L	1	1	1	0
6	2012	M	L	1	0
6	2012	M	L	0
6	2012	M	L	1	1
6	2012	M	L	1	1	1	0
6	2012	M	L	1	0
6	2012	M	L	0
6	2012	M	L	1	0
6	2012	M	L	1	1	1	0
6	2012	M	L	0
6	2012	M	L	1	1	1	0
6	2012	M	L	0
6	2012	M	L	0
6	2012	M	L	0
6	2012	M	L	0
6	2012	M	L	1	1
6	2012	M	L	0
6	2012	M	L	1	1	1	0
6	2012	M	L	1	1	1	0
6	2012	M	L	0
6	2012	M	L	1	0
6	2012	M	L	1	1	1	0
6	2012	M	L	0
6	2012	M	L	0
6	2012	M	L	1	0
6	2012	M	L	0
6	2012	M	L	1	1	1	1
6	2012	M	L	1	1	1	0
6	2012	M	L	0
6	2012	M	L	1	0
6	2012	M	L	1	0
6	2012	M	L	0
6	2012	M	L	0
6	2012	M	L	0
6	2012	M	L	0
6	2012	M	L	1	1	1	0
6	2012	M	L	1	1	1	0
6	2012	M	L	0
6	2012	M	L	0
6	2012	M	L	1	1	1	0
6	2012	M	L	0
6	2012	M	L	0
6	2012	M	L	1	1	1	0
6	2012	M	L	0
6	2012	M	L	0
6	2012	M	L	1	1
6	2012	M	L	0
6	2012	M	L	1	1	1	0
6	2012	M	L	1	1	1	0
6	2012	M	L	0
6	2012	M	L	1	1
6	2012	M	L	1	1
6	2012	M	L	1	1	1	0
6	2012	M	L	1	1
6	2012	M	L	1	1
6	2012	M	L	0
6	2012	M	L	1	1	1	0
6	2012	M	L	0
6	2012	M	L	0
6	2012	M	L	1	0
7	2012	L	M	1	1	1	0
7	2012	L	M	0
7	2012	L	M	0
7	2012	L	M	1	1	1	0
7	2012	L	M	1	1
7	2012	L	M	1	0
7	2012	L	M	1	1	1	1
7	2012	L	M	1	1
7	2012	L	M	0
7	2012	L	M	0
7	2012	L	M	0
7	2012	L	M	0
7	2012	L	M	1	1	1	1
7	2012	L	M	0
7	2012	L	M	1	0
7	2012	L	M	0
7	2012	L	M	0
7	2012	L	M	1	1	1	1
7	2012	L	M	1	0
7	2012	L	M	0
7	2012	L	M	0
7	2012	L	M	0
7	2012	L	M	1	1	1	1
7	2012	L	M	0
7	2012	L	M	1	1
7	2012	L	M	1	0
7	2012	L	M	1	1	1	0
7	2012	L	M	1	0
7	2012	L	M	0
7	2012	L	M	1	1	1	0
7	2012	L	M	1	1
7	2012	L	M	0
7	2012	L	M	1	1	1	1
7	2012	L	M	1	1
7	2012	L	M	0
7	2012	L	M	1	1	1	1
7	2012	L	M	0
7	2012	L	M	0
7	2012	L	M	1	0
7	2012	L	M	0
7	2012	L	M	0
7	2012	L	M	0
7	2012	L	M	0
7	2012	L	M	0
7	2012	L	M	1	1	1	0
7	2012	L	M	1	1	1	0
7	2012	L	M	0
7	2012	L	M	0
7	2012	L	M	0
7	2012	L	M	1	1	1	1
7	2012	L	M	0
7	2012	L	M	1	1	1	1
7	2012	L	M	0
7	2012	L	M	0
7	2012	L	M	0
7	2012	L	M	0
7	2012	L	M	1	1	1	0
7	2012	L	M	1	0
7	2012	L	M	1	1	1	0
7	2012	L	M	1	1
7	2012	L	M	1	0
7	2012	L	M	1	1	1	0
7	2012	L	M	0
7	2012	L	M	1	1
7	2012	L	M	1	1	1	1
7	2012	L	M	1	1
7	2012	L	M	0
7	2012	L	M	0
7	2012	L	M	0
7	2012	L	M	0
7	2012	L	M	0
7	2012	L	M	0
7	2012	L	M	1	1
7	2012	L	M	1	1	1	1
7	2012	L	M	1	0
7	2012	L	M	1	1	1	0
7	2012	L	M	0
7	2012	L	M	1	1
7	2012	L	M	0
7	2012	L	M	0
7	2012	L	M	0
7	2012	L	M	1	1	1	1
7	2012	L	M	0
7	2012	L	M	0
8	2012	L	M	1	1	1	0
8	2012	L	M	0
8	2012	L	M	0
8	2012	L	M	1	1
8	2012	L	M	1	1	1	0
8	2012	L	M	1	1
8	2012	L	M	0
8	2012	L	M	1	1	1	0
8	2012	L	M	1	0
8	2012	L	M	1	1	1	1
8	2012	L	M	0
8	2012	L	M	0
8	2012	L	M	0
8	2012	L	M	0
8	2012	L	M	1	1	1	1
8	2012	L	M	1	0
8	2012	L	M	0
8	2012	L	M	0
8	2012	L	M	1	0
8	2012	L	M	1	1	1	0
8	2012	L	M	0
8	2012	L	M	1	1	1	0
8	2012	L	M	0
8	2012	L	M	0
8	2012	L	M	1	1	1	0
8	2012	L	M	1	1
8	2012	L	M	0
8	2012	L	M	0
8	2012	L	M	0
8	2012	L	M	1	1	1	0
8	2012	L	M	0
8	2012	L	M	0
8	2012	L	M	0
8	2012	L	M	1	1	1	0
8	2012	L	M	0
8	2012	L	M	0
8	2012	L	M	0
8	2012	L	M	1	1	1	0
8	2012	L	M	0
8	2012	L	M	0
8	2012	L	M	0
8	2012	L	M	1	0
8	2012	L	M	0
8	2012	L	M	0
8	2012	L	M	0
8	2012	L	M	0
8	2012	L	M	0
8	2012	L	M	1	1	1	1
8	2012	L	M	0
8	2012	L	M	1	0
8	2012	L	M	0
8	2012	L	M	1	1	1	1
8	2012	L	M	0
8	2012	L	M	0
8	2012	L	M	1	0
8	2012	L	M	0
8	2012	L	M	1	1	1	0
8	2012	L	M	1	1	1	1
8	2012	L	M	0
8	2012	L	M	1	1
8	2012	L	M	0
8	2012	L	M	0
8	2012	L	M	0
8	2012	L	M	0
8	2012	L	M	0
8	2012	L	M	0
8	2012	L	M	0
8	2012	L	M	0
8	2012	L	M	0
8	2012	L	M	0
8	2012	L	M	1	1	1	1
8	2012	L	M	1	1
8	2012	L	M	0
8	2012	L	M	1	1	1	0
8	2012	L	M	0
8	2012	L	M	1	1
8	2012	L	M	1	1	1	0
8	2012	L	M	1	0
8	2012	L	M	0
8	2012	L	M	0
8	2012	L	M	1	1	1	1
8	2012	L	M	0
8	2012	L	M	0
8	2012	L	M	0
9	2012	L	L	1	0
9	2012	L	L	0
9	2012	L	L	1	1	1	1
9	2012	L	L	0
9	2012	L	L	1	1	1	0
9	2012	L	L	1	1
9	2012	L	L	0
9	2012	L	L	0
9	2012	L	L	0
9	2012	L	L	0
9	2012	L	L	1	0
9	2012	L	L	1	1	1	1
9	2012	L	L	0
9	2012	L	L	0
9	2012	L	L	0
9	2012	L	L	0
9	2012	L	L	0
9	2012	L	L	1	0
9	2012	L	L	0
9	2012	L	L	0
9	2012	L	L	1	1	1	0
9	2012	L	L	1	1	1	0
9	2012	L	L	0
9	2012	L	L	0
9	2012	L	L	0
9	2012	L	L	0
9	2012	L	L	1	1	1	1
9	2012	L	L	1	1	1	1
9	2012	L	L	0
9	2012	L	L	0
9	2012	L	L	1	1	1	0
9	2012	L	L	0
9	2012	L	L	1	0
9	2012	L	L	0
9	2012	L	L	0
9	2012	L	L	0
9	2012	L	L	1	1	1	1
9	2012	L	L	1	0
9	2012	L	L	1	1
9	2012	L	L	1	0
9	2012	L	L	0
9	2012	L	L	0
9	2012	L	L	0
9	2012	L	L	0
9	2012	L	L	0
9	2012	L	L	1	1	1	0
9	2012	L	L	0
9	2012	L	L	0
9	2012	L	L	1	1	1	1
9	2012	L	L	1	0
9	2012	L	L	0
9	2012	L	L	1	1	1	1
9	2012	L	L	1	1
9	2012	L	L	0
9	2012	L	L	0
9	2012	L	L	1	0
9	2012	L	L	0
9	2012	L	L	1	1	1	0
9	2012	L	L	0
9	2012	L	L	0
9	2012	L	L	1	0
9	2012	L	L	1	1	1	0
9	2012	L	L	0
9	2012	L	L	1	1	1	1
9	2012	L	L	0
9	2012	L	L	0
9	2012	L	L	1	0
9	2012	L	L	0
9	2012	L	L	1	1	1	0
9	2012	L	L	0
9	2012	L	L	0
9	2012	L	L	0
9	2012	L	L	1	0
9	2012	L	L	0
9	2012	L	L	0
9	2012	L	L	0
9	2012	L	L	0
9	2012	L	L	0
9	2012	L	L	1	1	1	0
9	2012	L	L	1	0
9	2012	L	L	0
9	2012	L	L	0
9	2012	L	L	0
9	2012	L	L	1	1	1	1
10	2012	L	L	0
10	2012	L	L	0
10	2012	L	L	0
10	2012	L	L	1	1	1	0
10	2012	L	L	1	0
10	2012	L	L	0
10	2012	L	L	0
10	2012	L	L	1	1	1	0
10	2012	L	L	1	1
10	2012	L	L	1	1	1	1
10	2012	L	L	0
10	2012	L	L	0
10	2012	L	L	1	1	1	0
10	2012	L	L	1	1
10	2012	L	L	0
10	2012	L	L	1	0	1	0
10	2012	L	L	0
10	2012	L	L	0
10	2012	L	L	0
10	2012	L	L	0
10	2012	L	L	0
10	2012	L	L	0
10	2012	L	L	1	1	1	0
10	2012	L	L	1	0
10	2012	L	L	0
10	2012	L	L	1	1	1	0
10	2012	L	L	1	1
10	2012	L	L	1	1
10	2012	L	L	0
10	2012	L	L	1	1	1	0
10	2012	L	L	0
10	2012	L	L	0
10	2012	L	L	1	1	1	0
10	2012	L	L	1	1
10	2012	L	L	1	1	1	0
10	2012	L	L	0
10	2012	L	L	1	1	1	0
10	2012	L	L	0
10	2012	L	L	1	0
10	2012	L	L	1	1	1	0
10	2012	L	L	1	0
10	2012	L	L	1	0
10	2012	L	L	1	0
10	2012	L	L	0
10	2012	L	L	1	1	1	0
10	2012	L	L	0
10	2012	L	L	1	1	1	0
10	2012	L	L	1	0
10	2012	L	L	0
10	2012	L	L	0
10	2012	L	L	0
10	2012	L	L	1	1	1	0
10	2012	L	L	1	0
10	2012	L	L	0
10	2012	L	L	0
10	2012	L	L	1	0
10	2012	L	L	0
10	2012	L	L	1	1	1	1
10	2012	L	L	1	0
10	2012	L	L	0
10	2012	L	L	1	0
10	2012	L	L	0
10	2012	L	L	1	1	1	1
10	2012	L	L	1	0
10	2012	L	L	1	1	1	0
10	2012	L	L	1	1
10	2012	L	L	0
10	2012	L	L	1	1	1	0
10	2012	L	L	0
10	2012	L	L	1	1
10	2012	L	L	0
10	2012	L	L	1	1	1	1
10	2012	L	L	1	1	1	0
10	2012	L	L	0
10	2012	L	L	0
10	2012	L	L	1	1	1	0
10	2012	L	L	0
10	2012	L	L	0
10	2012	L	L	0
10	2012	L	L	0
10	2012	L	L	1	1	1	0
10	2012	L	L	1	0
10	2012	L	L	0
10	2012	L	L	1	1	1	0
11	2012	M	M	1	0
11	2012	M	M	1	0
11	2012	M	M	1	1	1	0
11	2012	M	M	0
11	2012	M	M	1	1	1	0
11	2012	M	M	0
11	2012	M	M	1	1
11	2012	M	M	1	1
11	2012	M	M	1	1	1	0
11	2012	M	M	0
11	2012	M	M	1	1	1	0
11	2012	M	M	0
11	2012	M	M	1	0
11	2012	M	M	1	0
11	2012	M	M	1	0
11	2012	M	M	0
11	2012	M	M	0
11	2012	M	M	0
11	2012	M	M	0
11	2012	M	M	1	1	1	0
11	2012	M	M	1	0
11	2012	M	M	1	1
11	2012	M	M	1	1	1	0
11	2012	M	M	0
11	2012	M	M	0
11	2012	M	M	1	1	1	1
11	2012	M	M	0
11	2012	M	M	0
11	2012	M	M	1	1	1	0
11	2012	M	M	1	1
11	2012	M	M	1	1	1	0
11	2012	M	M	0
11	2012	M	M	1	0
11	2012	M	M	1	0
11	2012	M	M	0
11	2012	M	M	0
11	2012	M	M	1	1	1	0
11	2012	M	M	0
11	2012	M	M	1	0
11	2012	M	M	1	0
11	2012	M	M	0
11	2012	M	M	1	1	1	0
11	2012	M	M	0
11	2012	M	M	1	0
11	2012	M	M	1	0
11	2012	M	M	0
11	2012	M	M	0
11	2012	M	M	0
11	2012	M	M	1	1	1	0
11	2012	M	M	1	0
11	2012	M	M	1	0
11	2012	M	M	0
11	2012	M	M	0
11	2012	M	M	1	0
11	2012	M	M	0
11	2012	M	M	1	0
11	2012	M	M	0
11	2012	M	M	1	1	1	0
11	2012	M	M	0
11	2012	M	M	1	1
11	2012	M	M	0
11	2012	M	M	0
11	2012	M	M	1	1	1	1
11	2012	M	M	0
11	2012	M	M	0
11	2012	M	M	1	1	1	0
11	2012	M	M	1	1	1	1
11	2012	M	M	0
11	2012	M	M	0
11	2012	M	M	0
11	2012	M	M	0
11	2012	M	M	0
11	2012	M	M	0
11	2012	M	M	0
11	2012	M	M	1	1	1	1
11	2012	M	M	1	1	1	0
11	2012	M	M	0
11	2012	M	M	1	0
11	2012	M	M	1	1
11	2012	M	M	1	1	1	0
11	2012	M	M	0
11	2012	M	M	0
11	2012	M	M	1	1	1	0
11	2012	M	M	0
12	2012	M	M	0
12	2012	M	M	0
12	2012	M	M	0
12	2012	M	M	1	0
12	2012	M	M	1	0
12	2012	M	M	1	1	1	0
12	2012	M	M	0
12	2012	M	M	0
12	2012	M	M	1	0
12	2012	M	M	1	0
12	2012	M	M	0
12	2012	M	M	1	1	1	1
12	2012	M	M	1	1	1	0
12	2012	M	M	1	0
12	2012	M	M	1	0
12	2012	M	M	1	0
12	2012	M	M	0
12	2012	M	M	0
12	2012	M	M	1	0
12	2012	M	M	1	0
12	2012	M	M	1	0
12	2012	M	M	0
12	2012	M	M	1	0
12	2012	M	M	0
12	2012	M	M	1	1
12	2012	M	M	1	0
12	2012	M	M	1	1	1	0
12	2012	M	M	1	0
12	2012	M	M	0
12	2012	M	M	1	0
12	2012	M	M	0
12	2012	M	M	0
12	2012	M	M	1	0
12	2012	M	M	1	0
12	2012	M	M	0
12	2012	M	M	1	1	1	0
12	2012	M	M	0
12	2012	M	M	1	1	1	0
12	2012	M	M	1	0
12	2012	M	M	0
12	2012	M	M	0
12	2012	M	M	0
12	2012	M	M	0
12	2012	M	M	1	0
12	2012	M	M	0
12	2012	M	M	0
12	2012	M	M	0
12	2012	M	M	0
12	2012	M	M	1	0
12	2012	M	M	0
12	2012	M	M	1	0
12	2012	M	M	1	0
12	2012	M	M	0
12	2012	M	M	0
12	2012	M	M	1	1	1	0
12	2012	M	M	1	0
12	2012	M	M	0
12	2012	M	M	0
12	2012	M	M	1	1	1	0
12	2012	M	M	1	0
12	2012	M	M	1	0
12	2012	M	M	0
12	2012	M	M	0
12	2012	M	M	0
12	2012	M	M	0
12	2012	M	M	0
12	2012	M	M	1	0
12	2012	M	M	1	1	1	1
12	2012	M	M	0
12	2012	M	M	1	1	1	1
12	2012	M	M	0
12	2012	M	M	0
12	2012	M	M	0
12	2012	M	M	1	1	1	0
12	2012	M	M	0
12	2012	M	M	1	1	1	0
12	2012	M	M	0
12	2012	M	M	1	0
12	2012	M	M	0
12	2012	M	M	1	0
12	2012	M	M	1	0
12	2012	M	M	1	0
12	2012	M	M	0
12	2012	M	M	0
13	2012	M	M	1	1	1	0
13	2012	M	M	0
13	2012	M	M	1	0
13	2012	M	M	0
13	2012	M	M	0
13	2012	M	M	0
13	2012	M	M	0
13	2012	M	M	1	1
13	2012	M	M	1	1	1	0
13	2012	M	M	0
13	2012	M	M	0
13	2012	M	M	1	0
13	2012	M	M	1	1	1	0
13	2012	M	M	1	0
13	2012	M	M	1	0
13	2012	M	M	1	1	1	0
13	2012	M	M	0
13	2012	M	M	0
13	2012	M	M	0
13	2012	M	M	1	1	1	0
13	2012	M	M	0
13	2012	M	M	1	1	1	1
13	2012	M	M	0
13	2012	M	M	0
13	2012	M	M	1	1	1	0
13	2012	M	M	1	1
13	2012	M	M	0
13	2012	M	M	1	1
13	2012	M	M	0
13	2012	M	M	1	1	1	1
13	2012	M	M	0
13	2012	M	M	0
13	2012	M	M	1	1	1	0
13	2012	M	M	1	1
13	2012	M	M	1	1	1	0
13	2012	M	M	1	1
13	2012	M	M	1	1	1	0
13	2012	M	M	0
13	2012	M	M	1	1
13	2012	M	M	1	1	1	0
13	2012	M	M	1	0
13	2012	M	M	1	0
13	2012	M	M	0
13	2012	M	M	0
13	2012	M	M	0
13	2012	M	M	1	1
13	2012	M	M	1	1
13	2012	M	M	1	1	1	0
13	2012	M	M	0
13	2012	M	M	1	0
13	2012	M	M	1	0
13	2012	M	M	0
13	2012	M	M	0
13	2012	M	M	0
13	2012	M	M	0
13	2012	M	M	1	0
13	2012	M	M	1	1	1	0
13	2012	M	M	1	0
13	2012	M	M	1	0
13	2012	M	M	0
13	2012	M	M	1	1	1	0
13	2012	M	M	1	1
13	2012	M	M	0
13	2012	M	M	1	1	1	0
13	2012	M	M	0
13	2012	M	M	1	0
13	2012	M	M	0
13	2012	M	M	1	1	1	0
13	2012	M	M	0
13	2012	M	M	1	1
13	2012	M	M	0
13	2012	M	M	1	1	1	0
13	2012	M	M	1	1	1	0
13	2012	M	M	0
13	2012	M	M	0
13	2012	M	M	0
13	2012	M	M	0
13	2012	M	M	0
13	2012	M	M	0
13	2012	M	M	0
13	2012	M	M	0
13	2012	M	M	1	1	1	0
13	2012	M	M	1	0
13	2012	M	M	0
14	2012	M	M	0
14	2012	M	M	1	0
14	2012	M	M	0
14	2012	M	M	1	1	1	1
14	2012	M	M	1	1
14	2012	M	M	0
14	2012	M	M	0
14	2012	M	M	1	1	1	1
14	2012	M	M	0
14	2012	M	M	0
14	2012	M	M	1	1	1	0
14	2012	M	M	0
14	2012	M	M	0
14	2012	M	M	1	1	1	0
14	2012	M	M	0
14	2012	M	M	1	1
14	2012	M	M	0
14	2012	M	M	1	1	1	1
14	2012	M	M	1	0
14	2012	M	M	1	1	1	0
14	2012	M	M	0
14	2012	M	M	0
14	2012	M	M	1	0
14	2012	M	M	0
14	2012	M	M	0
14	2012	M	M	1	0
14	2012	M	M	1	1	1	0
14	2012	M	M	0
14	2012	M	M	0
14	2012	M	M	1	1	1	0
14	2012	M	M	1	1	1	1
14	2012	M	M	0
14	2012	M	M	0
14	2012	M	M	0
14	2012	M	M	0
14	2012	M	M	0
14	2012	M	M	1	1	1	0
14	2012	M	M	1	1
14	2012	M	M	1	1
14	2012	M	M	0
14	2012	M	M	1	1	1	0
14	2012	M	M	1	0
14	2012	M	M	1	0
14	2012	M	M	0
14	2012	M	M	0
14	2012	M	M	1	1	1	0
14	2012	M	M	1	0
14	2012	M	M	1	0
14	2012	M	M	0
14	2012	M	M	0
14	2012	M	M	1	1	1	1
14	2012	M	M	1	0
14	2012	M	M	1	1	1	0
14	2012	M	M	0
14	2012	M	M	1	0
14	2012	M	M	1	1	1	0
14	2012	M	M	1	1
14	2012	M	M	1	0
14	2012	M	M	0
14	2012	M	M	1	0
14	2012	M	M	1	1	1	0
14	2012	M	M	0
14	2012	M	M	1	0
14	2012	M	M	0
14	2012	M	M	0
14	2012	M	M	0
14	2012	M	M	0
14	2012	M	M	1	0
14	2012	M	M	0
14	2012	M	M	1	0
14	2012	M	M	1	0
14	2012	M	M	0
14	2012	M	M	0
14	2012	M	M	0
14	2012	M	M	1	1	1	1
14	2012	M	M	0
14	2012	M	M	1	1	1	0
14	2012	M	M	0
14	2012	M	M	1	1
14	2012	M	M	1	1	1	0
14	2012	M	M	0
14	2012	M	M	1	0
14	2012	M	M	0
14	2012	M	M	0
15	2012	L	L	1	0
15	2012	L	L	0
15	2012	L	L	1	0
15	2012	L	L	0
15	2012	L	L	0
15	2012	L	L	0
15	2012	L	L	1	0
15	2012	L	L	1	1	1	0
15	2012	L	L	1	1
15	2012	L	L	1	1
15	2012	L	L	0
15	2012	L	L	1	1	1	0
15	2012	L	L	1	0
15	2012	L	L	1	0
15	2012	L	L	1	0
15	2012	L	L	0
15	2012	L	L	0
15	2012	L	L	1	1	1	1
15	2012	L	L	0
15	2012	L	L	1	1	1	1
15	2012	L	L	1	0
15	2012	L	L	1	1
15	2012	L	L	1	1	1	1
15	2012	L	L	1	1
15	2012	L	L	0
15	2012	L	L	1	0
15	2012	L	L	1	1	1	0
15	2012	L	L	0
15	2012	L	L	1	1	1	1
15	2012	L	L	0
15	2012	L	L	1	1	1	0
15	2012	L	L	0
15	2012	L	L	1	0
15	2012	L	L	1	1
15	2012	L	L	0
15	2012	L	L	1	1	1	0
15	2012	L	L	1	1
15	2012	L	L	1	1	1	0
15	2012	L	L	0
15	2012	L	L	1	1
15	2012	L	L	0
15	2012	L	L	1	1	1	0
15	2012	L	L	1	0
15	2012	L	L	0
15	2012	L	L	0
15	2012	L	L	1	0
15	2012	L	L	0
15	2012	L	L	1	1	1	0
15	2012	L	L	1	1	1	1
15	2012	L	L	0
15	2012	L	L	1	1
15	2012	L	L	1	0
15	2012	L	L	1	1	1	0
15	2012	L	L	1	1
15	2012	L	L	0
15	2012	L	L	0
15	2012	L	L	1	1	1	1
15	2012	L	L	1	0
15	2012	L	L	0
15	2012	L	L	1	0
15	2012	L	L	1	1
15	2012	L	L	1	1	1	0
15	2012	L	L	0
15	2012	L	L	0
15	2012	L	L	0
15	2012	L	L	1	0
15	2012	L	L	0
15	2012	L	L	1	0
15	2012	L	L	0
15	2012	L	L	0
15	2012	L	L	1	1	1	1
15	2012	L	L	1	0
15	2012	L	L	1	1	1	0
15	2012	L	L	1	1
15	2012	L	L	1	0
15	2012	L	L	1	0
15	2012	L	L	1	1	1	1
15	2012	L	L	1	0
15	2012	L	L	1	1
15	2012	L	L	1	1
15	2012	L	L	1	1	1	0
15	2012	L	L	1	1	1	0
15	2012	L	L	1	0
15	2012	L	L	0
16	2012	L	L	0
16	2012	L	L	0
16	2012	L	L	0
16	2012	L	L	0
16	2012	L	L	0
16	2012	L	L	1	0
16	2012	L	L	1	1	1	1
16	2012	L	L	1	0
16	2012	L	L	1	0
16	2012	L	L	1	0
16	2012	L	L	0
16	2012	L	L	1	0
16	2012	L	L	0
16	2012	L	L	1	0
16	2012	L	L	1	1	1	1
16	2012	L	L	1	0
16	2012	L	L	0
16	2012	L	L	0
16	2012	L	L	1	0
16	2012	L	L	0
16	2012	L	L	1	1	1	1
16	2012	L	L	1	0
16	2012	L	L	0
16	2012	L	L	0
16	2012	L	L	1	0
16	2012	L	L	0
16	2012	L	L	1	1	1	1
16	2012	L	L	0
16	2012	L	L	0
16	2012	L	L	0
16	2012	L	L	0
16	2012	L	L	1	1	1	1
16	2012	L	L	0
16	2012	L	L	0
16	2012	L	L	0
16	2012	L	L	1	0
16	2012	L	L	0
16	2012	L	L	0
16	2012	L	L	1	1	1	0
16	2012	L	L	1	1	1	1
16	2012	L	L	1	0
16	2012	L	L	0
16	2012	L	L	0
16	2012	L	L	0
16	2012	L	L	0
16	2012	L	L	1	1	1	1
16	2012	L	L	1	0
16	2012	L	L	0
16	2012	L	L	0
16	2012	L	L	0
16	2012	L	L	1	1	0
16	2012	L	L	0
16	2012	L	L	0
16	2012	L	L	0
16	2012	L	L	0
16	2012	L	L	0
16	2012	L	L	0
16	2012	L	L	1	0
16	2012	L	L	0
16	2012	L	L	1	1	1	1
16	2012	L	L	0
16	2012	L	L	0
16	2012	L	L	0
16	2012	L	L	0
16	2012	L	L	0
16	2012	L	L	0
16	2012	L	L	0
16	2012	L	L	1	0
16	2012	L	L	1	0
16	2012	L	L	1	0
16	2012	L	L	0
16	2012	L	L	1	1	1	0
16	2012	L	L	0
16	2012	L	L	0
16	2012	L	L	0
16	2012	L	L	0
16	2012	L	L	0
16	2012	L	L	0
16	2012	L	L	0
16	2012	L	L	0
16	2012	L	L	1	1	1	0
16	2012	L	L	0
16	2012	L	L	1	1	1	0
16	2012	L	L	0
1	2013	M	L	1	0
1	2013	M	L	1	1
1	2013	M	L	1	1	0
1	2013	M	L	1	0
1	2013	M	L	1	0
1	2013	M	L	1	1	0
1	2013	M	L	1	1	1	0
1	2013	M	L	1	1
1	2013	M	L	1	1
1	2013	M	L	1	1
1	2013	M	L	1	1	0
1	2013	M	L	1	0
1	2013	M	L	1	1	1	0
1	2013	M	L	0
1	2013	M	L	0
1	2013	M	L	1	1	1	1
1	2013	M	L	0
1	2013	M	L	1	1
1	2013	M	L	1	1	1	0
1	2013	M	L	0
1	2013	M	L	0
2	2013	M	L	1	1
2	2013	M	L	1	1
2	2013	M	L	1	1	1	1
2	2013	M	L	1	1	1	1
2	2013	M	L	1	1
2	2013	M	L	1	1
2	2013	M	L	0
2	2013	M	L	1	1	1	0
2	2013	M	L	1	1
2	2013	M	L	1	1	1	0
2	2013	M	L	1	1
2	2013	M	L	1	1
2	2013	M	L	1	1
2	2013	M	L	1	1	1	0
2	2013	M	L	0
2	2013	M	L	1	1
2	2013	M	L	1	1	1	0
2	2013	M	L	1	1
2	2013	M	L	1	1	1	0
2	2013	M	L	1	1
2	2013	M	L	0
3	2013	L	M	1	1
3	2013	L	M	1	1	1	0
3	2013	L	M	1	0
3	2013	L	M	0
3	2013	L	M	0
3	2013	L	M	1	1	1	1
3	2013	L	M	1	1	1	1
3	2013	L	M	1	0
3	2013	L	M	0
3	2013	L	M	1	1	1	1
3	2013	L	M	0
3	2013	L	M	0
3	2013	L	M	0
3	2013	L	M	0
3	2013	L	M	1	1	1	1
3	2013	L	M	0
3	2013	L	M	1	1	1	0
3	2013	L	M	1	0
3	2013	L	M	0
3	2013	L	M	1	1
3	2013	L	M	1	1	1	0
4	2013	L	M	0
4	2013	L	M	0
4	2013	L	M	1	1	1	0
4	2013	L	M	0
4	2013	L	M	0
4	2013	L	M	0
4	2013	L	M	0
4	2013	L	M	0
4	2013	L	M	0
4	2013	L	M	0
4	2013	L	M	1	1	1	0
4	2013	L	M	0
4	2013	L	M	1	1
4	2013	L	M	1	1	1	0
4	2013	L	M	0
4	2013	L	M	1	1	1	0
4	2013	L	M	0
4	2013	L	M	0
4	2013	L	M	0
4	2013	L	M	0
4	2013	L	M	0
5	2013	L	M	0
5	2013	L	M	1	0
5	2013	L	M	1	1	1	0
5	2013	L	M	1	1	1	0
5	2013	L	M	1	1
5	2013	L	M	1	1
5	2013	L	M	1	1	1	1
5	2013	L	M	0
5	2013	L	M	1	0
5	2013	L	M	0
5	2013	L	M	1	1	1	1
5	2013	L	M	1	1
5	2013	L	M	0
5	2013	L	M	0
5	2013	L	M	1	1	1	1
5	2013	L	M	0
5	2013	L	M	0
5	2013	L	M	0
5	2013	L	M	0
5	2013	L	M	1	1	1	0
5	2013	L	M	1	1
6	2013	L	M	0
6	2013	L	M	0
6	2013	L	M	1	1	1	0
6	2013	L	M	0
6	2013	L	M	1	1
6	2013	L	M	1	1	1	0
6	2013	L	M	1	1
6	2013	L	M	1	1	1	0
6	2013	L	M	0
6	2013	L	M	1	1	1	1
6	2013	L	M	0
6	2013	L	M	0
6	2013	L	M	1	1	1	0
6	2013	L	M	1	1
6	2013	L	M	1	1
6	2013	L	M	1	1
6	2013	L	M	1	1
6	2013	L	M	1	1	1	0
6	2013	L	M	1	1
6	2013	L	M	1	1	1	1
6	2013	L	M	1	1
7	2013	M	L	1	1	1	1
7	2013	M	L	0
7	2013	M	L	1	1
7	2013	M	L	1	1	1	1
7	2013	M	L	1	1
7	2013	M	L	1	0
7	2013	M	L	1	1
7	2013	M	L	1	1	1	0
7	2013	M	L	0
7	2013	M	L	1	1	1	1
7	2013	M	L	0
7	2013	M	L	0
7	2013	M	L	0
7	2013	M	L	0
7	2013	M	L	1	1	1	0
7	2013	M	L	0
7	2013	M	L	0
7	2013	M	L	1	1	1	0
7	2013	M	L	1	1	1	0
7	2013	M	L	0
7	2013	M	L	0
8	2013	M	L	0
8	2013	M	L	0
8	2013	M	L	0
8	2013	M	L	0
8	2013	M	L	0
8	2013	M	L	0
8	2013	M	L	0
8	2013	M	L	1	1	1	0
8	2013	M	L	1	1
8	2013	M	L	1	1
8	2013	M	L	1	1
8	2013	M	L	1	1	1	0
8	2013	M	L	0
8	2013	M	L	1	1	1	1
8	2013	M	L	0
8	2013	M	L	1	1	1	0
8	2013	M	L	1	1
8	2013	M	L	1	1
8	2013	M	L	1	0
8	2013	M	L	1	1	1	0
8	2013	M	L	0
9	2013	L	L	0
9	2013	L	L	1	1	1	0
9	2013	L	L	0
9	2013	L	L	1	1	1	0
9	2013	L	L	0
9	2013	L	L	1	1
9	2013	L	L	0
9	2013	L	L	1	1	1	1
9	2013	L	L	1	1
9	2013	L	L	1	1
9	2013	L	L	1	1	1	1
9	2013	L	L	0
9	2013	L	L	0
9	2013	L	L	0
9	2013	L	L	0
9	2013	L	L	1	1
9	2013	L	L	1	1
9	2013	L	L	1	1	1	0
9	2013	L	L	0
9	2013	L	L	1	1	1	1
9	2013	L	L	0
10	2013	L	L	1	1
10	2013	L	L	1	1
10	2013	L	L	1	1	1	0
10	2013	L	L	1	1	1	0
10	2013	L	L	0
10	2013	L	L	0
10	2013	L	L	1	1
10	2013	L	L	1	1
10	2013	L	L	1	1	1	1
10	2013	L	L	1	0
10	2013	L	L	1	1
10	2013	L	L	1	1	1	0
10	2013	L	L	1	1
10	2013	L	L	1	1	1	0
10	2013	L	L	0
10	2013	L	L	0
10	2013	L	L	1	1	1	0
10	2013	L	L	0
10	2013	L	L	0
10	2013	L	L	1	1	1	0
10	2013	L	L	1	0
11	2013	M	M	0
11	2013	M	M	0
11	2013	M	M	0
11	2013	M	M	0
11	2013	M	M	0
11	2013	M	M	0
11	2013	M	M	0
11	2013	M	M	0
11	2013	M	M	0
11	2013	M	M	1	0
11	2013	M	M	0
11	2013	M	M	0
11	2013	M	M	0
11	2013	M	M	0
11	2013	M	M	0
11	2013	M	M	0
11	2013	M	M	0
11	2013	M	M	0
11	2013	M	M	0
11	2013	M	M	1	1
11	2013	M	M	1	1	1	0
12	2013	M	M	0
12	2013	M	M	1	1	1	0
12	2013	M	M	0
12	2013	M	M	1	1	1	0
12	2013	M	M	1	1
12	2013	M	M	1	1
12	2013	M	M	0
12	2013	M	M	0
12	2013	M	M	0
12	2013	M	M	0
12	2013	M	M	0
12	2013	M	M	0
12	2013	M	M	0
12	2013	M	M	1	1	1	1
12	2013	M	M	0
12	2013	M	M	0
12	2013	M	M	0
12	2013	M	M	0
12	2013	M	M	1	1	1	0
12	2013	M	M	1	1
12	2013	M	M	1	0
13	2013	M	M	0
13	2013	M	M	0
13	2013	M	M	0
13	2013	M	M	0
13	2013	M	M	0
13	2013	M	M	0
13	2013	M	M	1	0
13	2013	M	M	1	1	1	0
13	2013	M	M	1	0
13	2013	M	M	0
13	2013	M	M	0
13	2013	M	M	0
13	2013	M	M	1	1	1	1
13	2013	M	M	0
13	2013	M	M	1	1
13	2013	M	M	0
13	2013	M	M	0
13	2013	M	M	0
13	2013	M	M	0
13	2013	M	M	1	1
13	2013	M	M	1	1	1	0
14	2013	M	M	0
14	2013	M	M	1	1	1	0
14	2013	M	M	0
14	2013	M	M	0
14	2013	M	M	1	1	1	0
14	2013	M	M	1	1
14	2013	M	M	1	1
14	2013	M	M	1	1	1	0
14	2013	M	M	0
14	2013	M	M	1	0
14	2013	M	M	0
14	2013	M	M	1	1	1	0
14	2013	M	M	0
14	2013	M	M	0
14	2013	M	M	1	1	1	0
14	2013	M	M	1	0
14	2013	M	M	1	0
14	2013	M	M	0
14	2013	M	M	0
14	2013	M	M	0
14	2013	M	M	0
15	2013	L	L	0
15	2013	L	L	1	1
15	2013	L	L	1	1	1	1
15	2013	L	L	1	1
15	2013	L	L	0
15	2013	L	L	1	1	1	0
15	2013	L	L	0
15	2013	L	L	0
15	2013	L	L	1	0
15	2013	L	L	0
15	2013	L	L	1	1	1	1
15	2013	L	L	1	1
15	2013	L	L	0
15	2013	L	L	1	1	1	1
15	2013	L	L	0
15	2013	L	L	1	1	1	0
15	2013	L	L	1	0
15	2013	L	L	0
15	2013	L	L	0
15	2013	L	L	1	1	1	1
15	2013	L	L	0
16	2013	L	L	0
16	2013	L	L	1	1	1	1
16	2013	L	L	0
16	2013	L	L	0
16	2013	L	L	0
16	2013	L	L	0
16	2013	L	L	0
16	2013	L	L	0
16	2013	L	L	1	0
16	2013	L	L	0
16	2013	L	L	0
16	2013	L	L	1	1	1	1
16	2013	L	L	1	0
16	2013	L	L	0
16	2013	L	L	1	1	1	1
16	2013	L	L	0
16	2013	L	L	0
16	2013	L	L	0
16	2013	L	L	0
16	2013	L	L	1	1	1	1
16	2013	L	L	0
1	2014	L	M	1	1	1	1
1	2014	L	M	1	1
1	2014	L	M	1	0
1	2014	L	M	0
1	2014	L	M	0
1	2014	L	M	1	1	1	0
1	2014	L	M	0
1	2014	L	M	0
1	2014	L	M	0
1	2014	L	M	1	1	1	0
1	2014	L	M	1	1
1	2014	L	M	1	1
1	2014	L	M	0
1	2014	L	M	1	1
1	2014	L	M	1	1	1	1
1	2014	L	M	0	1
1	2014	L	M	0
1	2014	L	M	1	1
1	2014	L	M	1	0
1	2014	L	M	1	1	1	1
1	2014	L	M	1	1
1	2014	L	M	1	1	1	1
1	2014	L	M	1	1
1	2014	L	M	1	1
1	2014	L	M	0
1	2014	L	M	1	1	1	1
1	2014	L	M	0
1	2014	L	M	1	1
2	2014	L	M	1	1	1	0
2	2014	L	M	1	1
2	2014	L	M	1	1
2	2014	L	M	1	1
2	2014	L	M	1	1	1	0
2	2014	L	M	1	0
2	2014	L	M	1	1
2	2014	L	M	0
2	2014	L	M	1	1	1	0
2	2014	L	M	1	1
2	2014	L	M	1	1
2	2014	L	M	1	1
2	2014	L	M	1	1
2	2014	L	M	1	1	1	0
2	2014	L	M	0
2	2014	L	M	1	1
2	2014	L	M	1	1
2	2014	L	M	1	1	1	0
2	2014	L	M	1	1
2	2014	L	M	1	1
2	2014	L	M	1	1
2	2014	L	M	1	1	1	0
2	2014	L	M	1	1
2	2014	L	M	1	1
2	2014	L	M	1	1
2	2014	L	M	1	1	1	0
2	2014	L	M	0
2	2014	L	M	0
3	2014	M	L	1	1	1	0
3	2014	M	L	0
3	2014	M	L	1	1
3	2014	M	L	0
3	2014	M	L	1	1
3	2014	M	L	1	1	1	1
3	2014	M	L	1	1
3	2014	M	L	1	0
3	2014	M	L	1	0
3	2014	M	L	1	1	1	0
3	2014	M	L	0
3	2014	M	L	0
3	2014	M	L	1	1	1	1
3	2014	M	L	0
3	2014	M	L	0
3	2014	M	L	0
3	2014	M	L	1	1	1	0
3	2014	M	L	1	1
3	2014	M	L	1	1
3	2014	M	L	1	1
3	2014	M	L	1	1	1	0
3	2014	M	L	1	1
3	2014	M	L	1	1
3	2014	M	L	1	1
3	2014	M	L	0
3	2014	M	L	1	1
3	2014	M	L	1	1	1	1
3	2014	M	L	1	1
4	2014	M	L	1	1	1	0
4	2014	M	L	0
4	2014	M	L	0
4	2014	M	L	1	1
4	2014	M	L	0
4	2014	M	L	0
4	2014	M	L	0
4	2014	M	L	1	1	1	0
4	2014	M	L	0
4	2014	M	L	1	1	1	0
4	2014	M	L	1	1
4	2014	M	L	1	1
4	2014	M	L	0
4	2014	M	L	1	1	1	0
4	2014	M	L	1	0
4	2014	M	L	0
4	2014	M	L	0
4	2014	M	L	1	1	1	0
4	2014	M	L	0
4	2014	M	L	0
4	2014	M	L	0
4	2014	M	L	1	1	1	0
4	2014	M	L	0
4	2014	M	L	1	1
4	2014	M	L	0
4	2014	M	L	1	1	1	0
4	2014	M	L	0
4	2014	M	L	1	1
5	2014	M	L	0
5	2014	M	L	1	0
5	2014	M	L	1	0
5	2014	M	L	1	1	1	1
5	2014	M	L	0
5	2014	M	L	0
5	2014	M	L	1	1	1	1
5	2014	M	L	0
5	2014	M	L	0
5	2014	M	L	0
5	2014	M	L	0
5	2014	M	L	1	0
5	2014	M	L	1	1	1	1
5	2014	M	L	1	0
5	2014	M	L	1	0
5	2014	M	L	1	1
5	2014	M	L	0
5	2014	M	L	0
5	2014	M	L	1	0
5	2014	M	L	1	1	1	0
5	2014	M	L	0
5	2014	M	L	1	0
5	2014	M	L	0
5	2014	M	L	0
5	2014	M	L	0
5	2014	M	L	0
5	2014	M	L	0
5	2014	M	L	1	0
6	2014	M	L	0
6	2014	M	L	0
6	2014	M	L	1
6	2014	M	L	1	0
6	2014	M	L	0
6	2014	M	L	1	1	1	0
6	2014	M	L	0
6	2014	M	L	1	1
6	2014	M	L	1	1	1	0
6	2014	M	L	1	1
6	2014	M	L	0
6	2014	M	L	1	0
6	2014	M	L	1	1
6	2014	M	L	0
6	2014	M	L	1	0
6	2014	M	L	1	1	1	0
6	2014	M	L	1	0
6	2014	M	L	0
6	2014	M	L	1	0
6	2014	M	L	0
6	2014	M	L	0
6	2014	M	L	1	0
6	2014	M	L	1	0
6	2014	M	L	0
6	2014	M	L	1	0
6	2014	M	L	0
6	2014	M	L	1	0
6	2014	M	L	0
7	2014	L	M	0
7	2014	L	M	1	1	1	0
7	2014	L	M	1	1
7	2014	L	M	1	1
7	2014	L	M	0
7	2014	L	M	1	1	1	0
7	2014	L	M	1	1
7	2014	L	M	1	1
7	2014	L	M	1	1
7	2014	L	M	1	1	1	0
7	2014	L	M	1	0
7	2014	L	M	0
7	2014	L	M	1	1
7	2014	L	M	1	1	1	0
7	2014	L	M	1	1
7	2014	L	M	1	1
7	2014	L	M	1	0
7	2014	L	M	1	1	1	0
7	2014	L	M	1	1
7	2014	L	M	1	1
7	2014	L	M	1	1
7	2014	L	M	0
7	2014	L	M	1	1
7	2014	L	M	1	1	1	1
7	2014	L	M	1	1
7	2014	L	M	1	1
7	2014	L	M	1	1	1	0
7	2014	L	M	1	1
8	2014	L	M	0
8	2014	L	M	0
8	2014	L	M	1
8	2014	L	M	1	1	1	0
8	2014	L	M	0
8	2014	L	M	0
8	2014	L	M	1	0
8	2014	L	M	0
8	2014	L	M	1	1
8	2014	L	M	1	1	1	1
8	2014	L	M	1	0
8	2014	L	M	1	1
8	2014	L	M	1	1	1	1
8	2014	L	M	0
8	2014	L	M	0
8	2014	L	M	0
8	2014	L	M	0
8	2014	L	M	0
8	2014	L	M	0
8	2014	L	M	0
8	2014	L	M	1	1	1	0
8	2014	L	M	1	0
8	2014	L	M	1	0
8	2014	L	M	0
8	2014	L	M	1	0
8	2014	L	M	1	0
8	2014	L	M	1	0
8	2014	L	M	0
9	2014	L	L	1	0
9	2014	L	L	1	1
9	2014	L	L	1	1	1	0
9	2014	L	L	1	1
9	2014	L	L	0
9	2014	L	L	0
9	2014	L	L	1	1	1	1
9	2014	L	L	0
9	2014	L	L	1	1
9	2014	L	L	1	1
9	2014	L	L	1	1	1	1
9	2014	L	L	1	1
9	2014	L	L	1	1
9	2014	L	L	1	1
9	2014	L	L	1	1	1	1
9	2014	L	L	1	1
9	2014	L	L	1	1
9	2014	L	L	1	1	1	1
9	2014	L	L	0
9	2014	L	L	0
9	2014	L	L	1	1
9	2014	L	L	0
9	2014	L	L	1	1
9	2014	L	L	1	1	1	1
9	2014	L	L	0
9	2014	L	L	1	1
9	2014	L	L	1	1	1	0
9	2014	L	L	1	1
10	2014	L	L	0
10	2014	L	L	0
10	2014	L	L	1	1	1	0
10	2014	L	L	1	0
10	2014	L	L	1	1	1	0
10	2014	L	L	1	1
10	2014	L	L	0
10	2014	L	L	1	1
10	2014	L	L	1	1	1	0
10	2014	L	L	1	1
10	2014	L	L	1	0
10	2014	L	L	1	1
10	2014	L	L	0
10	2014	L	L	0
10	2014	L	L	0
10	2014	L	L	0
10	2014	L	L	1	1
10	2014	L	L	0
10	2014	L	L	1	1	1	0
10	2014	L	L	0
10	2014	L	L	1	1
10	2014	L	L	1	1
10	2014	L	L	0
10	2014	L	L	1	1	1	0
10	2014	L	L	0
10	2014	L	L	1	1	1	0
10	2014	L	L	1	1
10	2014	L	L	1	1
11	2014	M	M	0
11	2014	M	M	1	1	1	0
11	2014	M	M	1	0
11	2014	M	M	1	0
11	2014	M	M	0
11	2014	M	M	0
11	2014	M	M	0
11	2014	M	M	1	1	1	0
11	2014	M	M	1	1
11	2014	M	M	0
11	2014	M	M	1	1	1	0
11	2014	M	M	0
11	2014	M	M	1	0
11	2014	M	M	0
11	2014	M	M	1	1	1	0
11	2014	M	M	0
11	2014	M	M	1	0
11	2014	M	M	0
11	2014	M	M	1	0
11	2014	M	M	0
11	2014	M	M	1	1
11	2014	M	M	1	1
11	2014	M	M	1	1
11	2014	M	M	1	1	1	1
11	2014	M	M	0
11	2014	M	M	0
11	2014	M	M	1	1	1	0
11	2014	M	M	0
12	2014	M	M	0
12	2014	M	M	0
12	2014	M	M	0
12	2014	M	M	1	0
12	2014	M	M	0
12	2014	M	M	0
12	2014	M	M	1	0
12	2014	M	M	0
12	2014	M	M	0
12	2014	M	M	0
12	2014	M	M	1	1	1	0
[truncated: 577 more rows]

## Sheet: g0_p
PLOT	YEAR	E.	L.	EMERG	E_SURV	L_SURV	REP_RAT
1	2012	L	M	1	1	1	1
1	2012	L	M	1	0	0
1	2012	L	M	1	1	1	0
1	2012	L	M	1	0	0
1	2012	L	M	1	0	0
1	2012	L	M	1	0	0
1	2012	L	M	1	1	1	1
1	2012	L	M	1	0	0
1	2012	L	M	1	1	1	0
1	2012	L	M	1	1	1	1
1	2012	L	M	1	1	1	1
1	2012	L	M	1	0	0
1	2012	L	M	1	1	1	1
1	2012	L	M	1	1	1	1
1	2012	L	M	1	1	1	0
1	2012	L	M	1	1	1	1
1	2012	L	M	1	1	1	1
1	2012	L	M	1	1	1	1
1	2012	L	M	1	1	1	1
1	2012	L	M	1	0	0
1	2012	L	M	1	0	0
1	2012	L	M	0
1	2012	L	M	0
1	2012	L	M	1	1	1	1
1	2012	L	M	1	1	1	1
1	2012	L	M	1	0	0
1	2012	L	M	1	1	1	1
1	2012	L	M	1	0	0
2	2012	L	M	1	0	0
2	2012	L	M	1	0	0
2	2012	L	M	1	0	0
2	2012	L	M	1	0	0
2	2012	L	M	1	0	0
2	2012	L	M	1	0	0
2	2012	L	M	1	0	0
2	2012	L	M	1	0	0
2	2012	L	M	1	0	0
2	2012	L	M	1	0	0
2	2012	L	M	1	0	0
2	2012	L	M	1	0	0
2	2012	L	M	1	0	0
2	2012	L	M	1	0	0
2	2012	L	M	1	0	0
2	2012	L	M	1	0	0
2	2012	L	M	1	0	0
2	2012	L	M	1	0	0
2	2012	L	M	0
2	2012	L	M	1	1	1	0
2	2012	L	M	1	0	0
2	2012	L	M	1	0	0
2	2012	L	M	1	0	0
2	2012	L	M	1	0	0
2	2012	L	M	1	0	0
2	2012	L	M	1	0	0
2	2012	L	M	1	0	0
2	2012	L	M	1	0	0
3	2012	M	L	1	0	0
3	2012	M	L	1	0	0
3	2012	M	L	0
3	2012	M	L	0
3	2012	M	L	1	0	0
3	2012	M	L	0
3	2012	M	L	1	0	0
3	2012	M	L	1	0	0
3	2012	M	L	1	0	0
3	2012	M	L	0
3	2012	M	L	1	0	0
3	2012	M	L	0
3	2012	M	L	1	0	0
3	2012	M	L	1	0	0
3	2012	M	L	1	0	0
3	2012	M	L	1	0	0
3	2012	M	L	1	0	0
3	2012	M	L	1	0	0
3	2012	M	L	0
3	2012	M	L	1	0	0
3	2012	M	L	1	0	0
3	2012	M	L	1	0	0
3	2012	M	L	0
3	2012	M	L	0
3	2012	M	L	1	0	0
3	2012	M	L	1	0	0
3	2012	M	L	1	0	0
3	2012	M	L	1	0	0
4	2012	M	L	1	0	0
4	2012	M	L	1	0	0
4	2012	M	L	0
4	2012	M	L	1	0	0
4	2012	M	L	1	0	0
4	2012	M	L	1	0	0
4	2012	M	L	1	0	0
4	2012	M	L	1	0	0
4	2012	M	L	1	0	0
4	2012	M	L	1	0	0
4	2012	M	L	1	0	0
4	2012	M	L	1	0	0
4	2012	M	L	1	1	1	1
4	2012	M	L	1	0	0
4	2012	M	L	1	0	0
4	2012	M	L	1	0	0
4	2012	M	L	1	0	0
4	2012	M	L	1	0	0
4	2012	M	L	1	0	0
4	2012	M	L	1	0	0
4	2012	M	L	1	0	0
4	2012	M	L	1	0	0
4	2012	M	L	0
4	2012	M	L	0
4	2012	M	L	0
4	2012	M	L	1	0	0
4	2012	M	L	1	0	0
4	2012	M	L	0
5	2012	M	L	0
5	2012	M	L	1	0	0
5	2012	M	L	0
5	2012	M	L	1	0	0
5	2012	M	L	1	0	0
5	2012	M	L	0
5	2012	M	L	1	0	0
5	2012	M	L	1	0	0
5	2012	M	L	0
5	2012	M	L	1	0	0
5	2012	M	L	1	0	0
5	2012	M	L	1	0	0
5	2012	M	L	1	0	0
5	2012	M	L	1	0	0
5	2012	M	L	1	0	0
5	2012	M	L	0
5	2012	M	L	0
5	2012	M	L	0
5	2012	M	L	1	0	0
5	2012	M	L	1	0	0
5	2012	M	L	1	0	0
5	2012	M	L	1	0	0
5	2012	M	L	1	0	0
5	2012	M	L	1	0	0
5	2012	M	L	0
5	2012	M	L	1	0	0
5	2012	M	L	1	0	0
5	2012	M	L	1	0	0
6	2012	M	L	1	0	0
6	2012	M	L	0
6	2012	M	L	0
6	2012	M	L	1	0	0
6	2012	M	L	1	0	0
6	2012	M	L	0
6	2012	M	L	1	0	0
6	2012	M	L	1	0	0
6	2012	M	L	1	0	0
6	2012	M	L	1	0	0
6	2012	M	L	1	0	0
6	2012	M	L	0
6	2012	M	L	1	0	0
6	2012	M	L	1	0	0
6	2012	M	L	1	0	0
6	2012	M	L	1	0	0
6	2012	M	L	0
6	2012	M	L	1	0	0
6	2012	M	L	1	0	0
6	2012	M	L	0
6	2012	M	L	1	0	0
6	2012	M	L	1	0	0
6	2012	M	L	0
6	2012	M	L	0
6	2012	M	L	1	0	0
6	2012	M	L	1	0	0
6	2012	M	L	0
6	2012	M	L	1	0	0
7	2012	L	M	1	1	1	1
7	2012	L	M	1	0	0
7	2012	L	M	1	1	1	1
7	2012	L	M	1	1	1	1
7	2012	L	M	1	1	1	1
7	2012	L	M	1	1	1	1
7	2012	L	M	0
7	2012	L	M	1	0	0
7	2012	L	M	1	1	1	1
7	2012	L	M	1	0	0
7	2012	L	M	1	0	0
7	2012	L	M	1	0	0
7	2012	L	M	1	0	0
7	2012	L	M	1	1	1	1
7	2012	L	M	1	1	1	1
7	2012	L	M	1	1	1	1
7	2012	L	M	0
7	2012	L	M	1	1	1	1
7	2012	L	M	0
7	2012	L	M	1	0	0
7	2012	L	M	1	0	0
7	2012	L	M	1	0	0
7	2012	L	M	1	1	1	1
7	2012	L	M	1	0	0
7	2012	L	M	1	1	1	1
7	2012	L	M	1	0	0
7	2012	L	M	1	0	0
7	2012	L	M	1	1	1	0
8	2012	L	M	0
8	2012	L	M	1	0	0
8	2012	L	M	1	0	0
8	2012	L	M	1	1	1	1
8	2012	L	M	1	0	0
8	2012	L	M	1	1	1	1
8	2012	L	M	1	0	0
8	2012	L	M	0
8	2012	L	M	1	1	1	1
8	2012	L	M	1	1	1	0
8	2012	L	M	1	1	1	1
8	2012	L	M	1	0	0
8	2012	L	M	1	0	0
8	2012	L	M	1	0	0
8	2012	L	M	1	1	1	1
8	2012	L	M	1	0	0
8	2012	L	M	1	0	0
8	2012	L	M	1	0	0
8	2012	L	M	0
8	2012	L	M	1	1	1	1
8	2012	L	M	1	0	0
8	2012	L	M	1	1	1	1
8	2012	L	M	0
8	2012	L	M	0
8	2012	L	M	1	1	1	1
8	2012	L	M	1	0	0
8	2012	L	M	0
8	2012	L	M	1	0	0
9	2012	L	L	1	0	0
9	2012	L	L	1	0	0
9	2012	L	L	1	0	0
9	2012	L	L	1	0	0
9	2012	L	L	0
9	2012	L	L	1	0	0
9	2012	L	L	1	0	0
9	2012	L	L	1	0	0
9	2012	L	L	1	1	1	1
9	2012	L	L	0
9	2012	L	L	1	0	0
9	2012	L	L	1	0	0
9	2012	L	L	1	1	1	1
9	2012	L	L	1	1	1	0
9	2012	L	L	1	0	0
9	2012	L	L	1	0	0
9	2012	L	L	1	0	0
9	2012	L	L	1	0	0
9	2012	L	L	1	0	0
9	2012	L	L	0
9	2012	L	L	1	0	0
9	2012	L	L	1	0	0
9	2012	L	L	1	0	0
9	2012	L	L	1	0	0
9	2012	L	L	1	0	0
9	2012	L	L	1	0	0
9	2012	L	L	1	0	0
9	2012	L	L	0
10	2012	L	L	0
10	2012	L	L	1	1	1	1
10	2012	L	L	1	1	1	1
10	2012	L	L	1	1	1	1
10	2012	L	L	1	1	1	0
10	2012	L	L	0
10	2012	L	L	1	1	1	1
10	2012	L	L	1	1	1	1
10	2012	L	L	0
10	2012	L	L	1	1	1	1
10	2012	L	L	1	1	1	1
10	2012	L	L	1	1	1	1
10	2012	L	L	1	0	0
10	2012	L	L	1	1	1	1
10	2012	L	L	0
10	2012	L	L	0
10	2012	L	L	1	1	1	1
10	2012	L	L	1	0	0
10	2012	L	L	1	0	0
10	2012	L	L	1	0	0
10	2012	L	L	1	0	0
10	2012	L	L	1	1	1	1
10	2012	L	L	1	0	0
10	2012	L	L	1	1	1	1
10	2012	L	L	1	1	1	1
10	2012	L	L	1	1	1	1
10	2012	L	L	1	1	1	1
10	2012	L	L	1	0	0
11	2012	M	M	1	0	0
11	2012	M	M	1	0	0
11	2012	M	M	1	0	0
11	2012	M	M	1	0	0
11	2012	M	M	1	0	0
11	2012	M	M	1	0	0
11	2012	M	M	1	0	0
11	2012	M	M	1	0	0
11	2012	M	M	1	0	0
11	2012	M	M	1	0	0
11	2012	M	M	0
11	2012	M	M	1	0	0
11	2012	M	M	1	0	0
11	2012	M	M	1	0	0
11	2012	M	M	0
11	2012	M	M	1	0	0
11	2012	M	M	1	0	0
11	2012	M	M	1	0	0
11	2012	M	M	1	0	0
11	2012	M	M	1	0	0
11	2012	M	M	1	0	0
11	2012	M	M	1	0	0
11	2012	M	M	1	0	0
11	2012	M	M	1	0	0
11	2012	M	M	1	1	1	1
11	2012	M	M	1	0	0
11	2012	M	M	1	0	0
11	2012	M	M	1	1	1	0
12	2012	M	M	1	0	0
12	2012	M	M	1	0	0
12	2012	M	M	1	0	0
12	2012	M	M	1	0	0
12	2012	M	M	1	0	0
12	2012	M	M	1	0	0
12	2012	M	M	1	0	0
12	2012	M	M	1	0	0
12	2012	M	M	1	0	0
12	2012	M	M	1	0	0
12	2012	M	M	1	0	0
12	2012	M	M	1	0	0
12	2012	M	M	1	1	1	1
12	2012	M	M	1	0	0
12	2012	M	M	1	0	0
12	2012	M	M	0
12	2012	M	M	1	0	0
12	2012	M	M	1	1	1	1
12	2012	M	M	1	0	0
12	2012	M	M	1	0	0
12	2012	M	M	1	1	1	1
12	2012	M	M	1	0	0
12	2012	M	M	1	0	0
12	2012	M	M	1	0	0
12	2012	M	M	1	0	0
12	2012	M	M	1	0	0
12	2012	M	M	1	0	0
12	2012	M	M	1	0	0
13	2012	M	M	1	0	0
13	2012	M	M	1	0	0
13	2012	M	M	1	0	0
13	2012	M	M	1	0	0
13	2012	M	M	1	0	0
13	2012	M	M	1	0	0
13	2012	M	M	1	0	0
13	2012	M	M	1	1	1	1
13	2012	M	M	1	1	1	1
13	2012	M	M	1	0	0
13	2012	M	M	1	0	0
13	2012	M	M	0
13	2012	M	M	1	0	0
13	2012	M	M	0
13	2012	M	M	1	0	0
13	2012	M	M	1	0	0
13	2012	M	M	1	0	0
13	2012	M	M	1	0	0
13	2012	M	M	0
13	2012	M	M	1	0	0
13	2012	M	M	1	0	0
13	2012	M	M	1	0	0
13	2012	M	M	1	1	1	1
13	2012	M	M	1	0	0
13	2012	M	M	1	0	0
13	2012	M	M	0
13	2012	M	M	1	0	0
13	2012	M	M	1	0	0
14	2012	M	M	1	0	0
14	2012	M	M	1	0	0
14	2012	M	M	1	1	1	0
14	2012	M	M	1	0	0
14	2012	M	M	1	0	0
14	2012	M	M	1	0	0
14	2012	M	M	1	0	0
14	2012	M	M	1	0	0
14	2012	M	M	1	0	0
14	2012	M	M	1	0	0
14	2012	M	M	1	0	0
14	2012	M	M	1	0	0
14	2012	M	M	1	0	0
14	2012	M	M	1	1	1	1
14	2012	M	M	1	0	0
14	2012	M	M	1	0	0
14	2012	M	M	1	0	0
14	2012	M	M	1	0	0
14	2012	M	M	0
14	2012	M	M	1	0	0
14	2012	M	M	1	0	0
14	2012	M	M	1	1	1	1
14	2012	M	M	1	0	0
14	2012	M	M	1	0	0
14	2012	M	M	1	0	0
14	2012	M	M	1	0	0
14	2012	M	M	1	0	0
14	2012	M	M	1	0	0
15	2012	L	L	1	0	0
15	2012	L	L	1	0	0
15	2012	L	L	1	0	0
15	2012	L	L	1	0	0
15	2012	L	L	1	1	1	1
15	2012	L	L	1	0	0
15	2012	L	L	1	1	1	1
15	2012	L	L	1	0	0
15	2012	L	L	1	0	0
15	2012	L	L	1	1	1	0
15	2012	L	L	1	0	0
15	2012	L	L	1	0	0
15	2012	L	L	1	1	1	1
15	2012	L	L	1	0	0
15	2012	L	L	1	1	1	1
15	2012	L	L	0
15	2012	L	L	1	1	1	1
15	2012	L	L	1	0	0
15	2012	L	L	1	0	0
15	2012	L	L	0
15	2012	L	L	1	1	1	1
15	2012	L	L	1	0	0
15	2012	L	L	1	0	0
15	2012	L	L	0
15	2012	L	L	1	0	0
15	2012	L	L	1	0	0
15	2012	L	L	1	0	0
15	2012	L	L	1	0	0
16	2012	L	L	1	0	0
16	2012	L	L	1	0	0
16	2012	L	L	1	0	0
16	2012	L	L	1	0	0
16	2012	L	L	1	0	0
16	2012	L	L	1	0	0
16	2012	L	L	1	0	0
16	2012	L	L	0
16	2012	L	L	0
16	2012	L	L	1	0	0
16	2012	L	L	1	0	0
16	2012	L	L	1	0	0
16	2012	L	L	0
16	2012	L	L	1	0	0
16	2012	L	L	1	0	0
16	2012	L	L	1	0	0
16	2012	L	L	1	1	1	1
16	2012	L	L	1	0	0
16	2012	L	L	1	0	0
16	2012	L	L	1	1	1	1
16	2012	L	L	1	0	0
16	2012	L	L	0
16	2012	L	L	1	0	0
16	2012	L	L	1	0	0
16	2012	L	L	0
16	2012	L	L	1	0	0
16	2012	L	L	1	1	1	1
16	2012	L	L	1	0	0
1	2013	M	L	0
1	2013	M	L	1	0
1	2013	M	L	0
1	2013	M	L	0
1	2013	M	L	0
1	2013	M	L	0
1	2013	M	L	1	1	0
1	2013	M	L	0
1	2013	M	L	0
1	2013	M	L	1	1	1	1
1	2013	M	L	1	0
1	2013	M	L	0
1	2013	M	L	0
1	2013	M	L	1	1	1	1
1	2013	M	L	1	0
1	2013	M	L	1	1	1	0
1	2013	M	L	1	0
1	2013	M	L	1	0
1	2013	M	L	1	1	1	1
1	2013	M	L	0
1	2013	M	L	1	1
1	2013	M	L	1	0
1	2013	M	L	1	0
1	2013	M	L	1	0
1	2013	M	L	0
1	2013	M	L	0
1	2013	M	L	0
1	2013	M	L	1	1	1	1
1	2013	M	L	1	0
1	2013	M	L	0
1	2013	M	L	0
1	2013	M	L	0
1	2013	M	L	0
1	2013	M	L	0
1	2013	M	L	0
1	2013	M	L	0
1	2013	M	L	0
1	2013	M	L	0
1	2013	M	L	0
1	2013	M	L	1	0
1	2013	M	L	0
1	2013	M	L	0
1	2013	M	L	0
1	2013	M	L	0
1	2013	M	L	0
1	2013	M	L	0
1	2013	M	L	0
1	2013	M	L	0
1	2013	M	L	0
1	2013	M	L	0
1	2013	M	L	0
1	2013	M	L	0
1	2013	M	L	0
1	2013	M	L	1	1	1	0
1	2013	M	L	0
1	2013	M	L	0
1	2013	M	L	0
1	2013	M	L	0
1	2013	M	L	0
1	2013	M	L	1	1	1	1
1	2013	M	L	0
1	2013	M	L	0
1	2013	M	L	0
2	2013	M	L	0
2	2013	M	L	0
2	2013	M	L	0
2	2013	M	L	0
2	2013	M	L	0
2	2013	M	L	0
2	2013	M	L	0
2	2013	M	L	0
2	2013	M	L	0
2	2013	M	L	1	0
2	2013	M	L	1	0
2	2013	M	L	0
2	2013	M	L	0
2	2013	M	L	1	1	0
2	2013	M	L	1	0
2	2013	M	L	0
2	2013	M	L	0
2	2013	M	L	0
2	2013	M	L	1	0
2	2013	M	L	0
2	2013	M	L	0
2	2013	M	L	0
2	2013	M	L	0
2	2013	M	L	0
2	2013	M	L	0
2	2013	M	L	0
2	2013	M	L	0
2	2013	M	L	0
2	2013	M	L	0
2	2013	M	L	0
2	2013	M	L	0
2	2013	M	L	1	0
2	2013	M	L	0
2	2013	M	L	1	1	0
2	2013	M	L	0
2	2013	M	L	0
2	2013	M	L	0
2	2013	M	L	0
2	2013	M	L	0
2	2013	M	L	0
2	2013	M	L	0
2	2013	M	L	0
2	2013	M	L	0
2	2013	M	L	1	0
2	2013	M	L	0
2	2013	M	L	0
2	2013	M	L	0
2	2013	M	L	0
2	2013	M	L	0
2	2013	M	L	0
2	2013	M	L	0
2	2013	M	L	0
2	2013	M	L	0
2	2013	M	L	1	1	0
2	2013	M	L	0
2	2013	M	L	0
2	2013	M	L	0
2	2013	M	L	0
2	2013	M	L	0
2	2013	M	L	0
2	2013	M	L	1	1	1	1
2	2013	M	L	0
2	2013	M	L	0
3	2013	L	M	1	0
3	2013	L	M	1	0
3	2013	L	M	1	1	1	1
3	2013	L	M	1	1	1	1
3	2013	L	M	0
3	2013	L	M	1	0
3	2013	L	M	0
3	2013	L	M	1	1	1	1
3	2013	L	M	1	0
3	2013	L	M	1	0
3	2013	L	M	0
3	2013	L	M	0
3	2013	L	M	1	0
3	2013	L	M	1	1
3	2013	L	M	1	1	1	1
3	2013	L	M	0
3	2013	L	M	1	1	1	1
3	2013	L	M	0
3	2013	L	M	0
3	2013	L	M	0
3	2013	L	M	1	1	1
3	2013	L	M	1	1	1	1
3	2013	L	M	1	0
3	2013	L	M	1	1
3	2013	L	M	0
3	2013	L	M	1	1	1	1
3	2013	L	M	1	1
3	2013	L	M	1	0
3	2013	L	M	1	0
3	2013	L	M	1	0
3	2013	L	M	1	1	1	1
3	2013	L	M	1	1
3	2013	L	M	1	0
3	2013	L	M	0
3	2013	L	M	0
3	2013	L	M	0
3	2013	L	M	0
3	2013	L	M	0
3	2013	L	M	0
3	2013	L	M	0
3	2013	L	M	0
3	2013	L	M	0
3	2013	L	M	1	1	1	1
3	2013	L	M	0
3	2013	L	M	1	0
3	2013	L	M	1	1	1	1
3	2013	L	M	0
3	2013	L	M	0
3	2013	L	M	0
3	2013	L	M	0
3	2013	L	M	0
3	2013	L	M	1	1	1	1
3	2013	L	M	0
3	2013	L	M	1	0
3	2013	L	M	1	0
3	2013	L	M	0
3	2013	L	M	1	0
3	2013	L	M	1	0
3	2013	L	M	1	0
3	2013	L	M	0
3	2013	L	M	1	0
3	2013	L	M	1	0
3	2013	L	M	0
4	2013	L	M	0
4	2013	L	M	0
4	2013	L	M	1	0
4	2013	L	M	0
4	2013	L	M	0
4	2013	L	M	0
4	2013	L	M	1	0
4	2013	L	M	0
4	2013	L	M	1	0
4	2013	L	M	0
4	2013	L	M	0
4	2013	L	M	1	0
4	2013	L	M	0
4	2013	L	M	1	0
4	2013	L	M	0
4	2013	L	M	1	1	1	1
4	2013	L	M	0
4	2013	L	M	0
4	2013	L	M	0
4	2013	L	M	1	0
4	2013	L	M	0
4	2013	L	M	0
4	2013	L	M	0
4	2013	L	M	1	0
4	2013	L	M	0
4	2013	L	M	0
4	2013	L	M	1	0
4	2013	L	M	0
4	2013	L	M	1	1	1	1
4	2013	L	M	1	0
4	2013	L	M	1	0
4	2013	L	M	1	0
4	2013	L	M	0
4	2013	L	M	0
4	2013	L	M	1	0
4	2013	L	M	0
4	2013	L	M	1	0
4	2013	L	M	0
4	2013	L	M	0
4	2013	L	M	1	0
4	2013	L	M	1	0
4	2013	L	M	0
4	2013	L	M	0
4	2013	L	M	0
4	2013	L	M	0
4	2013	L	M	0
4	2013	L	M	0
4	2013	L	M	0
4	2013	L	M	0
4	2013	L	M	1	0
4	2013	L	M	0
4	2013	L	M	0
4	2013	L	M	0
4	2013	L	M	0
4	2013	L	M	0
4	2013	L	M	0
4	2013	L	M	0
4	2013	L	M	0
4	2013	L	M	0
4	2013	L	M	0
4	2013	L	M	0
4	2013	L	M	0
4	2013	L	M	0
5	2013	L	M	0
5	2013	L	M	0
5	2013	L	M	0
5	2013	L	M	1	1	0
5	2013	L	M	0
5	2013	L	M	1	1
5	2013	L	M	1	0
5	2013	L	M	0
5	2013	L	M	1	0
5	2013	L	M	0
5	2013	L	M	0
5	2013	L	M	1	0
5	2013	L	M	0
5	2013	L	M	0
5	2013	L	M	0
5	2013	L	M	0
5	2013	L	M	1	1	1	1
5	2013	L	M	1	0
5	2013	L	M	0
5	2013	L	M	0
5	2013	L	M	1	1	1	1
5	2013	L	M	1	0
5	2013	L	M	1	0
5	2013	L	M	0
5	2013	L	M	0
5	2013	L	M	0
5	2013	L	M	0
5	2013	L	M	0
5	2013	L	M	0
5	2013	L	M	0
5	2013	L	M	0
5	2013	L	M	0
5	2013	L	M	1	1	1	1
5	2013	L	M	0
5	2013	L	M	0
5	2013	L	M	0
5	2013	L	M	0
5	2013	L	M	0
5	2013	L	M	0
5	2013	L	M	0
5	2013	L	M	0
5	2013	L	M	0
5	2013	L	M	0
5	2013	L	M	0
5	2013	L	M	0
5	2013	L	M	0
5	2013	L	M	0
5	2013	L	M	0
5	2013	L	M	1	0
5	2013	L	M	0
5	2013	L	M	0
5	2013	L	M	0
5	2013	L	M	0
5	2013	L	M	0
5	2013	L	M	0
5	2013	L	M	0
5	2013	L	M	0
5	2013	L	M	0
5	2013	L	M	0
5	2013	L	M	0
5	2013	L	M	0
5	2013	L	M	0
5	2013	L	M	0
6	2013	L	M	0
6	2013	L	M	0
6	2013	L	M	0
6	2013	L	M	0
6	2013	L	M	0
6	2013	L	M	0
6	2013	L	M	0
6	2013	L	M	0
6	2013	L	M	0
6	2013	L	M	1	0
6	2013	L	M	1	0
6	2013	L	M	1	0
6	2013	L	M	0
6	2013	L	M	1	1	1	0
6	2013	L	M	1	0
6	2013	L	M	1	0
6	2013	L	M	0
6	2013	L	M	1	1	1	1
6	2013	L	M	1	0
6	2013	L	M	0
6	2013	L	M	1	0
6	2013	L	M	0
6	2013	L	M	0
6	2013	L	M	0
6	2013	L	M	1	0
6	2013	L	M	1	0
6	2013	L	M	0
6	2013	L	M	1	0
6	2013	L	M	0
6	2013	L	M	0
6	2013	L	M	1	1	1	1
6	2013	L	M	0
6	2013	L	M	0
6	2013	L	M	1	0
6	2013	L	M	0
6	2013	L	M	0
6	2013	L	M	0
6	2013	L	M	0
6	2013	L	M	0
6	2013	L	M	0
6	2013	L	M	0
6	2013	L	M	1	0
6	2013	L	M	0
6	2013	L	M	1	0
6	2013	L	M	0
6	2013	L	M	0
6	2013	L	M	0
6	2013	L	M	0
6	2013	L	M	1	0
6	2013	L	M	0
6	2013	L	M	1	0
6	2013	L	M	0
6	2013	L	M	0
6	2013	L	M	0
6	2013	L	M	1	0
6	2013	L	M	0
6	2013	L	M	0
6	2013	L	M	1	0
6	2013	L	M	0
6	2013	L	M	0
6	2013	L	M	1	0
6	2013	L	M	1	0
6	2013	L	M	1	0
7	2013	M	L	1	1
7	2013	M	L	0
7	2013	M	L	1	1	1	1
7	2013	M	L	0
7	2013	M	L	0
7	2013	M	L	0
7	2013	M	L	0
7	2013	M	L	1	1	1	1
7	2013	M	L	0
7	2013	M	L	1	0
7	2013	M	L	1	0
7	2013	M	L	1	0
7	2013	M	L	1	0
7	2013	M	L	0
7	2013	M	L	1	0
7	2013	M	L	1	0
7	2013	M	L	0
7	2013	M	L	1	1	1	1
7	2013	M	L	1	1	0
7	2013	M	L	0
7	2013	M	L	0
7	2013	M	L	0
7	2013	M	L	1	1	1	1
7	2013	M	L	1	0
7	2013	M	L	0
7	2013	M	L	1	1
7	2013	M	L	1	1	1	1
7	2013	M	L	0
7	2013	M	L	1	1	1	1
7	2013	M	L	1	1
7	2013	M	L	1	1
7	2013	M	L	1	1	0
7	2013	M	L	0
7	2013	M	L	0
7	2013	M	L	1	0
7	2013	M	L	1	0
7	2013	M	L	1	0
7	2013	M	L	0
7	2013	M	L	0
7	2013	M	L	1	1	1	1
7	2013	M	L	0
7	2013	M	L	1	1
7	2013	M	L	1	0
7	2013	M	L	0
7	2013	M	L	1	0
7	2013	M	L	0
7	2013	M	L	1	0
7	2013	M	L	1	1	1	1
7	2013	M	L	1	1
7	2013	M	L	1	1	1	1
7	2013	M	L	1	1
7	2013	M	L	0
7	2013	M	L	1	0
7	2013	M	L	0
7	2013	M	L	1	1
7	2013	M	L	1	1
7	2013	M	L	1	1	1	1
7	2013	M	L	0
7	2013	M	L	0
7	2013	M	L	1	1	1	1
7	2013	M	L	1	0
7	2013	M	L	0
7	2013	M	L	0
8	2013	M	L	0
8	2013	M	L	0
8	2013	M	L	0
8	2013	M	L	0
8	2013	M	L	0
8	2013	M	L	0
8	2013	M	L	0
8	2013	M	L	0
8	2013	M	L	0
8	2013	M	L	0
8	2013	M	L	0
8	2013	M	L	1	1	1	1
8	2013	M	L	0
8	2013	M	L	0
8	2013	M	L	0
8	2013	M	L	0
8	2013	M	L	0
8	2013	M	L	0
8	2013	M	L	1	0
8	2013	M	L	0
8	2013	M	L	1	0
8	2013	M	L	1	0
8	2013	M	L	0
8	2013	M	L	1	1	1	1
8	2013	M	L	0
8	2013	M	L	1	1	1	1
8	2013	M	L	1	0
8	2013	M	L	1	1	1	1
8	2013	M	L	0
8	2013	M	L	0
8	2013	M	L	0
8	2013	M	L	1	1	0
8	2013	M	L	0
8	2013	M	L	0
8	2013	M	L	0
8	2013	M	L	1	0
8	2013	M	L	1	1	1	1
8	2013	M	L	0
8	2013	M	L	0
8	2013	M	L	0
8	2013	M	L	0
8	2013	M	L	0
8	2013	M	L	1	1	0
8	2013	M	L	0
8	2013	M	L	0
8	2013	M	L	0
8	2013	M	L	1	1	0
8	2013	M	L	1	1
8	2013	M	L	0
8	2013	M	L	0
8	2013	M	L	0
8	2013	M	L	0
8	2013	M	L	0
8	2013	M	L	0
8	2013	M	L	0
8	2013	M	L	0
8	2013	M	L	0
8	2013	M	L	0
8	2013	M	L	1	1	0
8	2013	M	L	0
8	2013	M	L	0
8	2013	M	L	0
8	2013	M	L	0
9	2013	L	L	0
9	2013	L	L	0
9	2013	L	L	1	1	1	0
9	2013	L	L	1	1	1	1
9	2013	L	L	1	1
9	2013	L	L	0
9	2013	L	L	1	1
9	2013	L	L	1	1
9	2013	L	L	1	1	1	1
9	2013	L	L	1	0
9	2013	L	L	1	0
9	2013	L	L	0
9	2013	L	L	1	0
9	2013	L	L	1	0
9	2013	L	L	0
9	2013	L	L	1	1
9	2013	L	L	0
9	2013	L	L	1	1	1	1
9	2013	L	L	0
9	2013	L	L	0
9	2013	L	L	0
9	2013	L	L	0
9	2013	L	L	1	0
9	2013	L	L	1	1	1	1
9	2013	L	L	1	1	1	1
9	2013	L	L	1	1
9	2013	L	L	1	1
9	2013	L	L	0
9	2013	L	L	1	1	1	1
9	2013	L	L	1	1
9	2013	L	L	1	1	1	1
9	2013	L	L	0
9	2013	L	L	1	1
9	2013	L	L	1	1	1	1
9	2013	L	L	0
9	2013	L	L	0
9	2013	L	L	1	1	1	1
9	2013	L	L	1	0
9	2013	L	L	1	0
9	2013	L	L	0
9	2013	L	L	0
9	2013	L	L	1	1	1	1
9	2013	L	L	1	1	1	1
9	2013	L	L	0
9	2013	L	L	0
9	2013	L	L	1	0
9	2013	L	L	0
9	2013	L	L	1	1	1	1
9	2013	L	L	1	0
9	2013	L	L	1	0
9	2013	L	L	1	0
9	2013	L	L	1	0
9	2013	L	L	0
9	2013	L	L	0
9	2013	L	L	1	1	1	0
9	2013	L	L	0
9	2013	L	L	1	0
9	2013	L	L	0
9	2013	L	L	0
9	2013	L	L	0
9	2013	L	L	1	0
9	2013	L	L	1	0
9	2013	L	L	1	1	1	1
10	2013	L	L	1	0
10	2013	L	L	0
10	2013	L	L	1	0
10	2013	L	L	0
10	2013	L	L	0
10	2013	L	L	0
10	2013	L	L	0
10	2013	L	L	1	1	1	1
10	2013	L	L	1	0
10	2013	L	L	1	0
10	2013	L	L	0
10	2013	L	L	0
10	2013	L	L	0
10	2013	L	L	0
10	2013	L	L	1	0
10	2013	L	L	1	0
10	2013	L	L	0
10	2013	L	L	0
10	2013	L	L	0
10	2013	L	L	0
10	2013	L	L	0
10	2013	L	L	0
10	2013	L	L	0
10	2013	L	L	1	1	1	1
10	2013	L	L	0
10	2013	L	L	0
10	2013	L	L	1	1	1	1
10	2013	L	L	0
10	2013	L	L	0
10	2013	L	L	1	0
10	2013	L	L	1	1	1	1
10	2013	L	L	1	0
10	2013	L	L	0
10	2013	L	L	0
10	2013	L	L	0
10	2013	L	L	1	0
10	2013	L	L	0
10	2013	L	L	0
10	2013	L	L	0
10	2013	L	L	1	0
10	2013	L	L	1	0
10	2013	L	L	1	0
10	2013	L	L	0
10	2013	L	L	0
10	2013	L	L	0
10	2013	L	L	0
10	2013	L	L	0
10	2013	L	L	0
10	2013	L	L	1	0
10	2013	L	L	1	0
10	2013	L	L	0
10	2013	L	L	0
10	2013	L	L	0
10	2013	L	L	0
10	2013	L	L	1	0
10	2013	L	L	1	0
10	2013	L	L	0
10	2013	L	L	0
10	2013	L	L	0
10	2013	L	L	0
10	2013	L	L	1	0
10	2013	L	L	0
10	2013	L	L	0
11	2013	M	M	0
11	2013	M	M	1	0
11	2013	M	M	0
11	2013	M	M	0
11	2013	M	M	0
11	2013	M	M	1	1	1	1
11	2013	M	M	1	0
11	2013	M	M	1	0
11	2013	M	M	0
11	2013	M	M	0
11	2013	M	M	1	1	1	1
11	2013	M	M	0
11	2013	M	M	0
11	2013	M	M	0
11	2013	M	M	0
11	2013	M	M	1	0
11	2013	M	M	0
11	2013	M	M	0
11	2013	M	M	0
11	2013	M	M	0
11	2013	M	M	0
11	2013	M	M	1	0
11	2013	M	M	1	0
11	2013	M	M	1	0
11	2013	M	M	0
11	2013	M	M	0
11	2013	M	M	1	0
11	2013	M	M	0
11	2013	M	M	0
11	2013	M	M	0
11	2013	M	M	0
11	2013	M	M	0
11	2013	M	M	0
11	2013	M	M	0
11	2013	M	M	0
11	2013	M	M	0
11	2013	M	M	0
11	2013	M	M	0
11	2013	M	M	0
11	2013	M	M	0
11	2013	M	M	0
11	2013	M	M	0
11	2013	M	M	0
11	2013	M	M	0
11	2013	M	M	0
11	2013	M	M	1	0
11	2013	M	M	0
11	2013	M	M	0
11	2013	M	M	0
11	2013	M	M	0
11	2013	M	M	0
11	2013	M	M	0
11	2013	M	M	0
11	2013	M	M	1	0
11	2013	M	M	0
11	2013	M	M	0
11	2013	M	M	0
11	2013	M	M	0
11	2013	M	M	1	0
11	2013	M	M	1	0
11	2013	M	M	0
11	2013	M	M	0
11	2013	M	M	0
12	2013	M	M	1	0
12	2013	M	M	0
12	2013	M	M	0
12	2013	M	M	0
12	2013	M	M	1	0
12	2013	M	M	0
12	2013	M	M	1	0
12	2013	M	M	0
12	2013	M	M	0
12	2013	M	M	0
12	2013	M	M	0
12	2013	M	M	0
12	2013	M	M	0
12	2013	M	M	0
12	2013	M	M	1	0
12	2013	M	M	0
12	2013	M	M	1	0
12	2013	M	M	0
12	2013	M	M	1	0
12	2013	M	M	0
12	2013	M	M	0
12	2013	M	M	0
12	2013	M	M	0
12	2013	M	M	1	0
12	2013	M	M	0
12	2013	M	M	1	0
12	2013	M	M	0
12	2013	M	M	0
12	2013	M	M	0
12	2013	M	M	0
12	2013	M	M	0
12	2013	M	M	0
12	2013	M	M	0
12	2013	M	M	0
12	2013	M	M	0
12	2013	M	M	1	0
12	2013	M	M	0
12	2013	M	M	1	1	1	1
12	2013	M	M	1	0
12	2013	M	M	0
12	2013	M	M	1	0
12	2013	M	M	1	0
12	2013	M	M	0
12	2013	M	M	1	0
12	2013	M	M	0
12	2013	M	M	0
12	2013	M	M	0
12	2013	M	M	0
12	2013	M	M	0
12	2013	M	M	1	0
12	2013	M	M	0
12	2013	M	M	0
12	2013	M	M	0
12	2013	M	M	0
12	2013	M	M	0
12	2013	M	M	0
12	2013	M	M	0
12	2013	M	M	0
12	2013	M	M	1	0
12	2013	M	M	0
12	2013	M	M	0
12	2013	M	M	1	0
12	2013	M	M	0
13	2013	M	M	0
13	2013	M	M	0
13	2013	M	M	0
13	2013	M	M	0
13	2013	M	M	0
13	2013	M	M	0
13	2013	M	M	1	1	1	1
13	2013	M	M	0
13	2013	M	M	1	1
13	2013	M	M	0
13	2013	M	M	0
13	2013	M	M	0
13	2013	M	M	0
13	2013	M	M	1	0
13	2013	M	M	1	0
13	2013	M	M	0
13	2013	M	M	1	0
13	2013	M	M	1	1	1	1
13	2013	M	M	1	1	1	1
13	2013	M	M	1	0
13	2013	M	M	0
13	2013	M	M	0
13	2013	M	M	0
13	2013	M	M	0
13	2013	M	M	1	1	1	1
13	2013	M	M	0
13	2013	M	M	0
13	2013	M	M	0
13	2013	M	M	0
13	2013	M	M	0
13	2013	M	M	0
13	2013	M	M	1	1	1	1
13	2013	M	M	0
13	2013	M	M	1	1
13	2013	M	M	1	1	1	1
13	2013	M	M	0
13	2013	M	M	1	0
13	2013	M	M	1	0
13	2013	M	M	0
13	2013	M	M	0
13	2013	M	M	1	0
13	2013	M	M	0
13	2013	M	M	0
13	2013	M	M	0
13	2013	M	M	0
13	2013	M	M	0
13	2013	M	M	0
13	2013	M	M	0
13	2013	M	M	0
13	2013	M	M	0
13	2013	M	M	0
13	2013	M	M	1	1	1	1
13	2013	M	M	0
13	2013	M	M	0
13	2013	M	M	0
13	2013	M	M	0
13	2013	M	M	0
13	2013	M	M	0
13	2013	M	M	0
13	2013	M	M	0
13	2013	M	M	0
13	2013	M	M	0
13	2013	M	M	0
14	2013	M	M	1	0
14	2013	M	M	0
14	2013	M	M	0
14	2013	M	M	0
14	2013	M	M	1	0
14	2013	M	M	0
14	2013	M	M	0
14	2013	M	M	1	0
14	2013	M	M	0
14	2013	M	M	0
14	2013	M	M	0
14	2013	M	M	0
14	2013	M	M	1	1	1	1
14	2013	M	M	0
14	2013	M	M	0
14	2013	M	M	0
14	2013	M	M	1	0
14	2013	M	M	0
14	2013	M	M	0
14	2013	M	M	0
14	2013	M	M	0
14	2013	M	M	0
14	2013	M	M	0
14	2013	M	M	1	0
14	2013	M	M	0
14	2013	M	M	0
14	2013	M	M	0
14	2013	M	M	0
14	2013	M	M	1	0
14	2013	M	M	0
14	2013	M	M	0
14	2013	M	M	0
14	2013	M	M	0
14	2013	M	M	0
14	2013	M	M	1	0
14	2013	M	M	0
14	2013	M	M	0
14	2013	M	M	1	0
14	2013	M	M	0
14	2013	M	M	0
14	2013	M	M	0
14	2013	M	M	1	0
14	2013	M	M	0
14	2013	M	M	0
14	2013	M	M	1	0
14	2013	M	M	0
14	2013	M	M	0
14	2013	M	M	0
14	2013	M	M	0
14	2013	M	M	0
14	2013	M	M	1	0
14	2013	M	M	0
14	2013	M	M	0
14	2013	M	M	0
14	2013	M	M	0
14	2013	M	M	0
14	2013	M	M	1	0
14	2013	M	M	0
14	2013	M	M	1	0
14	2013	M	M	1	0
14	2013	M	M	1	0
14	2013	M	M	0
14	2013	M	M	0
15	2013	L	L	0
15	2013	L	L	0
15	2013	L	L	1	1	1	1
15	2013	L	L	0
15	2013	L	L	0
15	2013	L	L	0
15	2013	L	L	0
15	2013	L	L	1	1	1	1
15	2013	L	L	0
15	2013	L	L	0
15	2013	L	L	0
15	2013	L	L	0
15	2013	L	L	0
15	2013	L	L	0
15	2013	L	L	1	1	1	1
15	2013	L	L	1	1	1	1
15	2013	L	L	0
15	2013	L	L	0
15	2013	L	L	1	0
15	2013	L	L	0
15	2013	L	L	0
15	2013	L	L	0
15	2013	L	L	1	1	1	1
15	2013	L	L	0
15	2013	L	L	1	0
15	2013	L	L	1	0
15	2013	L	L	0
15	2013	L	L	0
15	2013	L	L	0
15	2013	L	L	0
15	2013	L	L	1	0
15	2013	L	L	1	1	1	1
15	2013	L	L	0
15	2013	L	L	0
15	2013	L	L	1	1	1	1
15	2013	L	L	1	0
15	2013	L	L	0
15	2013	L	L	1	1	1	1
15	2013	L	L	0
15	2013	L	L	0
15	2013	L	L	1	1	1	1
15	2013	L	L	0
15	2013	L	L	0
15	2013	L	L	0
15	2013	L	L	0
15	2013	L	L	1	1
15	2013	L	L	1	1	1	1
15	2013	L	L	1	1
15	2013	L	L	0
15	2013	L	L	1	1	1	1
15	2013	L	L	0
15	2013	L	L	0
15	2013	L	L	1	0
15	2013	L	L	0
15	2013	L	L	1	1
15	2013	L	L	1	1	1	1
15	2013	L	L	1	0
15	2013	L	L	0
15	2013	L	L	1	0
15	2013	L	L	0
15	2013	L	L	0
15	2013	L	L	1	0
15	2013	L	L	1	0
16	2013	L	L	0
16	2013	L	L	1	1	1	1
16	2013	L	L	0
16	2013	L	L	1	0
16	2013	L	L	1	1	1	0
16	2013	L	L	1	0
16	2013	L	L	1	1	0
16	2013	L	L	0
16	2013	L	L	1	0
16	2013	L	L	0
16	2013	L	L	1	0
16	2013	L	L	0
16	2013	L	L	0
16	2013	L	L	0
16	2013	L	L	0
16	2013	L	L	0
16	2013	L	L	0
16	2013	L	L	0
16	2013	L	L	0
16	2013	L	L	1	0
16	2013	L	L	1	0
16	2013	L	L	0
16	2013	L	L	0
16	2013	L	L	0
16	2013	L	L	1	0
16	2013	L	L	1	1	1	0
16	2013	L	L	0
16	2013	L	L	0
16	2013	L	L	0
16	2013	L	L	0
16	2013	L	L	1	0
16	2013	L	L	0
16	2013	L	L	0
16	2013	L	L	0
16	2013	L	L	0
16	2013	L	L	0
16	2013	L	L	0
16	2013	L	L	0
16	2013	L	L	0
16	2013	L	L	0
16	2013	L	L	0
16	2013	L	L	0
16	2013	L	L	0
16	2013	L	L	0
16	2013	L	L	1	1	1	1
16	2013	L	L	1	1	1	1
16	2013	L	L	1	0
16	2013	L	L	1	0
16	2013	L	L	1	1	1	1
16	2013	L	L	0
16	2013	L	L	0
16	2013	L	L	0
16	2013	L	L	1	0
16	2013	L	L	0
16	2013	L	L	0
16	2013	L	L	1	1
16	2013	L	L	1	1	1	1
16	2013	L	L	0
16	2013	L	L	0
16	2013	L	L	0
16	2013	L	L	0
16	2013	L	L	0
16	2013	L	L	0
1	2014	L	M	0
1	2014	L	M	0
1	2014	L	M	0
1	2014	L	M	0
1	2014	L	M	0
1	2014	L	M	1	0
1	2014	L	M	0
1	2014	L	M	0
1	2014	L	M	1	1	1	1
1	2014	L	M	0
1	2014	L	M	1	0
1	2014	L	M	1	1	1	1
1	2014	L	M	0
1	2014	L	M	1	0
1	2014	L	M	0
1	2014	L	M	0
1	2014	L	M	0
1	2014	L	M	1	1	1	1
1	2014	L	M	0
1	2014	L	M	0
1	2014	L	M	0
1	2014	L	M	0
1	2014	L	M	0
1	2014	L	M	1	1	1	1
1	2014	L	M	1	1	1	1
1	2014	L	M	0
1	2014	L	M	0
1	2014	L	M	0
1	2014	L	M	1	1	0
1	2014	L	M	0
1	2014	L	M	0
1	2014	L	M	1	1	1	1
1	2014	L	M	0
1	2014	L	M	0
1	2014	L	M	1	1	0
1	2014	L	M	0
1	2014	L	M	1	1	1	1
1	2014	L	M	1	1		1
1	2014	L	M	0
1	2014	L	M	1	1	1	1
1	2014	L	M	0
1	2014	L	M	0
1	2014	L	M	1	0
1	2014	L	M	1	1	1	1
1	2014	L	M	0
1	2014	L	M	0
1	2014	L	M	0
1	2014	L	M	0
1	2014	L	M	0
1	2014	L	M	1	1	1	1
1	2014	L	M	0
1	2014	L	M	0
1	2014	L	M	0
1	2014	L	M	0
1	2014	L	M	0
1	2014	L	M	1	1	1	1
1	2014	L	M	0
1	2014	L	M	0
1	2014	L	M	1	1	1	1
1	2014	L	M	0
1	2014	L	M	1	1	1	1
1	2014	L	M	0
1	2014	L	M	0
2	2014	L	M	1	0
2	2014	L	M	0
2	2014	L	M	0
2	2014	L	M	1	0
2	2014	L	M	1	1	1	0
2	2014	L	M	0
2	2014	L	M	0
2	2014	L	M	1	1	1	1
2	2014	L	M	1	1		1
2	2014	L	M	0
2	2014	L	M	0
2	2014	L	M	0
2	2014	L	M	0
2	2014	L	M	1	1	1	1
2	2014	L	M	1	1
2	2014	L	M	1	1
2	2014	L	M	1	1	1	1
2	2014	L	M	0
2	2014	L	M	0
2	2014	L	M	0
2	2014	L	M	1	0
2	2014	L	M	1	0
2	2014	L	M	1	1	1	0
2	2014	L	M	0
2	2014	L	M	1	1
2	2014	L	M	1	1	1	1
2	2014	L	M	0
2	2014	L	M	0
2	2014	L	M	0
2	2014	L	M	1	1	1	1
2	2014	L	M	1	1	1	0
2	2014	L	M	1	1		0
2	2014	L	M	0
2	2014	L	M	1	1	1	1
2	2014	L	M	0
2	2014	L	M	0
2	2014	L	M	1	1
2	2014	L	M	1	1	1	0
2	2014	L	M	1	1
2	2014	L	M	0
2	2014	L	M	0
2	2014	L	M	0
2	2014	L	M	0
2	2014	L	M	0
2	2014	L	M	0
2	2014	L	M	0
2	2014	L	M	1	1	0
2	2014	L	M	0
2	2014	L	M	1	1	0
2	2014	L	M	1	1
2	2014	L	M	1	1
2	2014	L	M	0
2	2014	L	M	1	0
2	2014	L	M	1	0
2	2014	L	M	0
2	2014	L	M	0
2	2014	L	M	0
2	2014	L	M	0
2	2014	L	M	1	1	0
2	2014	L	M	0
2	2014	L	M	0
2	2014	L	M	0
2	2014	L	M	0
3	2014	M	L	0
3	2014	M	L	0
3	2014	M	L	0
3	2014	M	L	1	0
3	2014	M	L	0
3	2014	M	L	1	0
3	2014	M	L	1	0
3	2014	M	L	1	1	1	1
3	2014	M	L	0
3	2014	M	L	0
3	2014	M	L	1	0
3	2014	M	L	0
3	2014	M	L	0
3	2014	M	L	1	1	1	1
3	2014	M	L	0
3	2014	M	L	0
3	2014	M	L	0
3	2014	M	L	0
3	2014	M	L	0
3	2014	M	L	0
3	2014	M	L	1	1	1	1
3	2014	M	L	1	1	0
3	2014	M	L	0
3	2014	M	L	0
3	2014	M	L	1	1
3	2014	M	L	1	1	1	1
3	2014	M	L	1	1
3	2014	M	L	1	1	1	1
3	2014	M	L	0
3	2014	M	L	1	1
3	2014	M	L	0
3	2014	M	L	0
3	2014	M	L	1	1	1	0
3	2014	M	L	0
3	2014	M	L	0
3	2014	M	L	1	1	0
3	2014	M	L	1	1	1	1
3	2014	M	L	1	1
3	2014	M	L	1	0
3	2014	M	L	0
3	2014	M	L	1	1	1	1
3	2014	M	L	0
3	2014	M	L	1	1	1	1
3	2014	M	L	0
3	2014	M	L	1	0
3	2014	M	L	1	1
3	2014	M	L	0
3	2014	M	L	1	1	1	1
3	2014	M	L	0
3	2014	M	L	1	1	1	1
3	2014	M	L	1	0
3	2014	M	L	1	1	1	0
3	2014	M	L	1	1
3	2014	M	L	1	1
3	2014	M	L	0
3	2014	M	L	0
3	2014	M	L	1	1	0
3	2014	M	L	0
3	2014	M	L	0
3	2014	M	L	0
3	2014	M	L	1	1	0
3	2014	M	L	0
3	2014	M	L	1	0
4	2014	M	L	1	0
4	2014	M	L	0
4	2014	M	L	0
4	2014	M	L	0
4	2014	M	L	1	0
4	2014	M	L	0
4	2014	M	L	0
4	2014	M	L	0
4	2014	M	L	0
4	2014	M	L	1	0
4	2014	M	L	0
4	2014	M	L	1	0
4	2014	M	L	0
4	2014	M	L	0
4	2014	M	L	0
4	2014	M	L	0
4	2014	M	L	0
4	2014	M	L	0
4	2014	M	L	0
4	2014	M	L	0
4	2014	M	L	0
4	2014	M	L	0
4	2014	M	L	0
4	2014	M	L	1	1	1	1
4	2014	M	L	0
4	2014	M	L	0
4	2014	M	L	0
4	2014	M	L	1	0
4	2014	M	L	0
4	2014	M	L	0
4	2014	M	L	0
4	2014	M	L	1	1	1	1
4	2014	M	L	0
4	2014	M	L	0
4	2014	M	L	0
4	2014	M	L	0
4	2014	M	L	0
4	2014	M	L	0
4	2014	M	L	1	0
4	2014	M	L	0
4	2014	M	L	0
4	2014	M	L	1	1	0
4	2014	M	L	0
4	2014	M	L	0
4	2014	M	L	0
4	2014	M	L	1	1	1	1
4	2014	M	L	0
4	2014	M	L	0
4	2014	M	L	1	0
4	2014	M	L	1	0
4	2014	M	L	1	1	0
4	2014	M	L	1	1	1	0
4	2014	M	L	1	0
4	2014	M	L	0
4	2014	M	L	1	1	1	1
4	2014	M	L	0
4	2014	M	L	0
4	2014	M	L	0
4	2014	M	L	1	1	0
4	2014	M	L	0
4	2014	M	L	1	1	1	1
4	2014	M	L	0
4	2014	M	L	0
5	2014	M	L	0
5	2014	M	L	1	0
5	2014	M	L	0
5	2014	M	L	0
5	2014	M	L	0
5	2014	M	L	0
5	2014	M	L	0
5	2014	M	L	0
5	2014	M	L	0
5	2014	M	L	0
5	2014	M	L	1	0
5	2014	M	L	1	0
5	2014	M	L	0
5	2014	M	L	0
5	2014	M	L	0
5	2014	M	L	1	1	0
5	2014	M	L	0
5	2014	M	L	1	0
5	2014	M	L	0
5	2014	M	L	0
5	2014	M	L	0
5	2014	M	L	0
5	2014	M	L	0
5	2014	M	L	0
5	2014	M	L	1	1	0
5	2014	M	L	1	1
5	2014	M	L	0
5	2014	M	L	0
5	2014	M	L	0
5	2014	M	L	0
5	2014	M	L	0
5	2014	M	L	0
5	2014	M	L	0
5	2014	M	L	0
5	2014	M	L	0
5	2014	M	L	0
5	2014	M	L	0
5	2014	M	L	0
5	2014	M	L	1	1	1	0
5	2014	M	L	0
5	2014	M	L	0
5	2014	M	L	0
5	2014	M	L	0
5	2014	M	L	0
5	2014	M	L	0
5	2014	M	L	0
5	2014	M	L	1	1	1	1
5	2014	M	L	0
5	2014	M	L	0
5	2014	M	L	0
5	2014	M	L	0
5	2014	M	L	0
5	2014	M	L	0
5	2014	M	L	0
5	2014	M	L	1	1	1	1
5	2014	M	L	0
5	2014	M	L	0
5	2014	M	L	1	0
5	2014	M	L	0
5	2014	M	L	0
5	2014	M	L	0
5	2014	M	L	0
5	2014	M	L	0
6	2014	M	L	0
6	2014	M	L	0
6	2014	M	L	0
6	2014	M	L	0
6	2014	M	L	1	1	1	1
6	2014	M	L	0
6	2014	M	L	0
6	2014	M	L	0
6	2014	M	L	0
6	2014	M	L	0
6	2014	M	L	0
6	2014	M	L	0
6	2014	M	L	0
6	2014	M	L	0
6	2014	M	L	0
6	2014	M	L	0
6	2014	M	L	1	1	1	1
6	2014	M	L	0
6	2014	M	L	1	1	0
6	2014	M	L	0
6	2014	M	L	1	1
6	2014	M	L	0
6	2014	M	L	1	1	0
6	2014	M	L	0
6	2014	M	L	1	0
6	2014	M	L	1	1	0
6	2014	M	L	0
6	2014	M	L	1	1		0
6	2014	M	L	1	1	1	0
6	2014	M	L	1	0
6	2014	M	L	1	1
6	2014	M	L	1	1	0
6	2014	M	L	0
6	2014	M	L	0
6	2014	M	L	0
6	2014	M	L	0
6	2014	M	L	0
6	2014	M	L	0
6	2014	M	L	0
6	2014	M	L	1	1	0
6	2014	M	L	0
6	2014	M	L	0
6	2014	M	L	0
6	2014	M	L	0
6	2014	M	L	0
6	2014	M	L	1	1
6	2014	M	L	1	1	0
6	2014	M	L	1	0
6	2014	M	L	0
6	2014	M	L	1	0
6	2014	M	L	0
6	2014	M	L	0
6	2014	M	L	0
6	2014	M	L	0
6	2014	M	L	1	1
6	2014	M	L	1	0
6	2014	M	L	1	1	1	0
6	2014	M	L	1	0
6	2014	M	L	1	1	0
6	2014	M	L	1	0
6	2014	M	L	1	0
6	2014	M	L	1	0
6	2014	M	L	1	0
7	2014	L	M	0
7	2014	L	M	0
7	2014	L	M	1	1	0
7	2014	L	M	1	1		1
7	2014	L	M	1	1	1	1
7	2014	L	M	0
7	2014	L	M	1	0
7	2014	L	M	0
7	2014	L	M	0
7	2014	L	M	0
7	2014	L	M	0
7	2014	L	M	1	1	0
7	2014	L	M	0
7	2014	L	M	1	1	0
7	2014	L	M	0
7	2014	L	M	0
7	2014	L	M	0
7	2014	L	M	1	1	1	0
7	2014	L	M	0
7	2014	L	M	1	1	1	1
7	2014	L	M	1	0
7	2014	L	M	1	0
7	2014	L	M	1	1	1	1
7	2014	L	M	1	0
7	2014	L	M	1	1	1	1
7	2014	L	M	0
7	2014	L	M	0
7	2014	L	M	1	0
7	2014	L	M	1	1	1	1
7	2014	L	M	1	0
7	2014	L	M	0
7	2014	L	M	1	1	1	0
7	2014	L	M	1	0
7	2014	L	M	0
7	2014	L	M	0
7	2014	L	M	0
7	2014	L	M	0
7	2014	L	M	0
7	2014	L	M	0
7	2014	L	M	1	1	1	1
7	2014	L	M	0
7	2014	L	M	0
7	2014	L	M	0
7	2014	L	M	1	1	0
7	2014	L	M	0
7	2014	L	M	1	0
7	2014	L	M	1	1	1	1
7	2014	L	M	0
7	2014	L	M	0
7	2014	L	M	1	1	1	1
7	2014	L	M	0
7	2014	L	M	0
7	2014	L	M	0
7	2014	L	M	1	1	1	0
7	2014	L	M	1	1	1	1
7	2014	L	M	1	0
7	2014	L	M	0
7	2014	L	M	1	1	1	1
7	2014	L	M	0
7	2014	L	M	0
7	2014	L	M	0
7	2014	L	M	1	1	1	1
7	2014	L	M	0
8	2014	L	M	1	1	0
8	2014	L	M	1	1
8	2014	L	M	0
8	2014	L	M	0
8	2014	L	M	1	1	1	0
8	2014	L	M	0
8	2014	L	M	1	1	0
8	2014	L	M	0
8	2014	L	M	0
8	2014	L	M	0
8	2014	L	M	0
8	2014	L	M	1	1	1	0
8	2014	L	M	0
8	2014	L	M	0
8	2014	L	M	1	1	1	0
8	2014	L	M	1	1	0
8	2014	L	M	0
8	2014	L	M	0
8	2014	L	M	0
8	2014	L	M	0
8	2014	L	M	0
8	2014	L	M	1	1
8	2014	L	M	0
8	2014	L	M	1	1	1	1
8	2014	L	M	1	1	1	1
8	2014	L	M	0
8	2014	L	M	0
8	2014	L	M	1	1	1	1
8	2014	L	M	0
8	2014	L	M	1	1
8	2014	L	M	0
8	2014	L	M	1	1
8	2014	L	M	1	1	0
8	2014	L	M	0
8	2014	L	M	0
8	2014	L	M	0
8	2014	L	M	1	0
8	2014	L	M	0
8	2014	L	M	0
8	2014	L	M	1	0
8	2014	L	M	1	1	0
8	2014	L	M	1	0
8	2014	L	M	1	0
8	2014	L	M	0
8	2014	L	M	1	0
8	2014	L	M	0
8	2014	L	M	0
8	2014	L	M	0
8	2014	L	M	0
8	2014	L	M	0
8	2014	L	M	1	1	0
8	2014	L	M	0
8	2014	L	M	1	0
8	2014	L	M	0
8	2014	L	M	0
8	2014	L	M	1	0
8	2014	L	M	1	1	1	1
8	2014	L	M	1	1	1	0
8	2014	L	M	1	0
8	2014	L	M	1	0
8	2014	L	M	1	0
8	2014	L	M	1	0
8	2014	L	M	0
9	2014	L	L	0
9	2014	L	L	0
9	2014	L	L	1	0
9	2014	L	L	0
9	2014	L	L	0
9	2014	L	L	0
9	2014	L	L	0
9	2014	L	L	0
9	2014	L	L	0
9	2014	L	L	0
9	2014	L	L	0
9	2014	L	L	1	0
9	2014	L	L	1	1		1
9	2014	L	L	1	1	1	1
9	2014	L	L	1	1		1
9	2014	L	L	0
9	2014	L	L	0
9	2014	L	L	0
9	2014	L	L	0
9	2014	L	L	0
9	2014	L	L	0
9	2014	L	L	0
9	2014	L	L	0
9	2014	L	L	0
9	2014	L	L	0
9	2014	L	L	0
9	2014	L	L	0
9	2014	L	L	0
9	2014	L	L	0
9	2014	L	L	0
9	2014	L	L	0
9	2014	L	L	1	0
9	2014	L	L	0
9	2014	L	L	1	1	0
9	2014	L	L	0
9	2014	L	L	0
9	2014	L	L	0
9	2014	L	L	0
9	2014	L	L	0
[truncated: 1,473 more rows]

## Sheet: ptr_o
PLOT	GEN	CODE	E.	L.	YEAR	EMERG	E_SURV	L_SURV
1	G0		M	L	2013	1	0
1	G0		M	L	2013	1	1
1	G0		M	L	2013	1	1	0
1	G0		M	L	2013	1	0
1	G0		M	L	2013	1	0
1	G0		M	L	2013	1	1	0
1	G0		M	L	2013	1	1	1
1	G0		M	L	2013	1	1
1	G0		M	L	2013	1	1
1	G0		M	L	2013	1	1
1	G0		M	L	2013	1	1	0
1	G0		M	L	2013	1	0
1	G0		M	L	2013	1	1	1
1	G0		M	L	2013	0
1	G0		M	L	2013	0
1	G0		M	L	2013	1	1	1
1	G0		M	L	2013	0
1	G0		M	L	2013	1	1
1	G0		M	L	2013	1	1	1
1	G0		M	L	2013	0
1	G0		M	L	2013	0
2	G0		M	L	2013	1	1
2	G0		M	L	2013	1	1
2	G0		M	L	2013	1	1	1
2	G0		M	L	2013	1	1	1
2	G0		M	L	2013	1	1
2	G0		M	L	2013	1	1
2	G0		M	L	2013	0
2	G0		M	L	2013	1	1	1
2	G0		M	L	2013	1	1
2	G0		M	L	2013	1	1	1
2	G0		M	L	2013	1	1
2	G0		M	L	2013	1	1
2	G0		M	L	2013	1	1
2	G0		M	L	2013	1	1	1
2	G0		M	L	2013	0
2	G0		M	L	2013	1	1
2	G0		M	L	2013	1	1	1
2	G0		M	L	2013	1	1
2	G0		M	L	2013	1	1	1
2	G0		M	L	2013	1	1
2	G0		M	L	2013	0
3	G0		L	M	2013	1	1
3	G0		L	M	2013	1	1	1
3	G0		L	M	2013	1	0
3	G0		L	M	2013	0
3	G0		L	M	2013	0
3	G0		L	M	2013	1	1	1
3	G0		L	M	2013	1	1	1
3	G0		L	M	2013	1	0
3	G0		L	M	2013	0
3	G0		L	M	2013	1	1	1
3	G0		L	M	2013	0
3	G0		L	M	2013	0
3	G0		L	M	2013	0
3	G0		L	M	2013	0
3	G0		L	M	2013	1	1	1
3	G0		L	M	2013	0
3	G0		L	M	2013	1	1	1
3	G0		L	M	2013	1	0
3	G0		L	M	2013	0
3	G0		L	M	2013	1	1
3	G0		L	M	2013	1	1	1
4	G0		L	M	2013	0
4	G0		L	M	2013	0
4	G0		L	M	2013	1	1	1
4	G0		L	M	2013	0
4	G0		L	M	2013	0
4	G0		L	M	2013	0
4	G0		L	M	2013	0
4	G0		L	M	2013	0
4	G0		L	M	2013	0
4	G0		L	M	2013	0
4	G0		L	M	2013	1	1	1
4	G0		L	M	2013	0
4	G0		L	M	2013	1	1
4	G0		L	M	2013	1	1	1
4	G0		L	M	2013	0
4	G0		L	M	2013	1	1	1
4	G0		L	M	2013	0
4	G0		L	M	2013	0
4	G0		L	M	2013	0
4	G0		L	M	2013	0
4	G0		L	M	2013	0
5	G0		L	M	2013	0
5	G0		L	M	2013	1	0
5	G0		L	M	2013	1	1	1
5	G0		L	M	2013	1	1	1
5	G0		L	M	2013	1	1
5	G0		L	M	2013	1	1
5	G0		L	M	2013	1	1	1
5	G0		L	M	2013	0
5	G0		L	M	2013	1	0
5	G0		L	M	2013	0
5	G0		L	M	2013	1	1	1
5	G0		L	M	2013	1	1
5	G0		L	M	2013	0
5	G0		L	M	2013	0
5	G0		L	M	2013	1	1	1
5	G0		L	M	2013	0
5	G0		L	M	2013	0
5	G0		L	M	2013	0
5	G0		L	M	2013	0
5	G0		L	M	2013	1	1	1
5	G0		L	M	2013	1	1
6	G0		L	M	2013	0
6	G0		L	M	2013	0
6	G0		L	M	2013	1	1	1
6	G0		L	M	2013	0
6	G0		L	M	2013	1	1
6	G0		L	M	2013	1	1	1
6	G0		L	M	2013	1	1
6	G0		L	M	2013	1	1	1
6	G0		L	M	2013	0
6	G0		L	M	2013	1	1	1
6	G0		L	M	2013	0
6	G0		L	M	2013	0
6	G0		L	M	2013	1	1	1
6	G0		L	M	2013	1	1
6	G0		L	M	2013	1	1
6	G0		L	M	2013	1	1
6	G0		L	M	2013	1	1
6	G0		L	M	2013	1	1	1
6	G0		L	M	2013	1	1
6	G0		L	M	2013	1	1	1
6	G0		L	M	2013	1	1
7	G0		M	L	2013	1	1	1
7	G0		M	L	2013	0
7	G0		M	L	2013	1	1
7	G0		M	L	2013	1	1	1
7	G0		M	L	2013	1	1
7	G0		M	L	2013	1	0
7	G0		M	L	2013	1	1
7	G0		M	L	2013	1	1	1
7	G0		M	L	2013	0
7	G0		M	L	2013	1	1	1
7	G0		M	L	2013	0
7	G0		M	L	2013	0
7	G0		M	L	2013	0
7	G0		M	L	2013	0
7	G0		M	L	2013	1	1	1
7	G0		M	L	2013	0
7	G0		M	L	2013	0
7	G0		M	L	2013	1	1	1
7	G0		M	L	2013	1	1	1
7	G0		M	L	2013	0
7	G0		M	L	2013	0
8	G0		M	L	2013	0
8	G0		M	L	2013	0
8	G0		M	L	2013	0
8	G0		M	L	2013	0
8	G0		M	L	2013	0
8	G0		M	L	2013	0
8	G0		M	L	2013	0
8	G0		M	L	2013	1	1	1
8	G0		M	L	2013	1	1
8	G0		M	L	2013	1	1
8	G0		M	L	2013	1	1
8	G0		M	L	2013	1	1	1
8	G0		M	L	2013	0
8	G0		M	L	2013	1	1	1
8	G0		M	L	2013	0
8	G0		M	L	2013	1	1	1
8	G0		M	L	2013	1	1
8	G0		M	L	2013	1	1
8	G0		M	L	2013	1	0
8	G0		M	L	2013	1	1	1
8	G0		M	L	2013	0
9	G0		L	L	2013	0
9	G0		L	L	2013	1	1	1
9	G0		L	L	2013	0
9	G0		L	L	2013	1	1	1
9	G0		L	L	2013	0
9	G0		L	L	2013	1	1
9	G0		L	L	2013	0
9	G0		L	L	2013	1	1	1
9	G0		L	L	2013	1	1
9	G0		L	L	2013	1	1
9	G0		L	L	2013	1	1	1
9	G0		L	L	2013	0
9	G0		L	L	2013	0
9	G0		L	L	2013	0
9	G0		L	L	2013	0
9	G0		L	L	2013	1	1
9	G0		L	L	2013	1	1
9	G0		L	L	2013	1	1	1
9	G0		L	L	2013	0
9	G0		L	L	2013	1	1	1
9	G0		L	L	2013	0
10	G0		L	L	2013	1	1
10	G0		L	L	2013	1	1
10	G0		L	L	2013	1	1	1
10	G0		L	L	2013	1	1	1
10	G0		L	L	2013	0
10	G0		L	L	2013	0
10	G0		L	L	2013	1	1
10	G0		L	L	2013	1	1
10	G0		L	L	2013	1	1	1
10	G0		L	L	2013	1	0
10	G0		L	L	2013	1	1
10	G0		L	L	2013	1	1	1
10	G0		L	L	2013	1	1
10	G0		L	L	2013	1	1	1
10	G0		L	L	2013	0
10	G0		L	L	2013	0
10	G0		L	L	2013	1	1	1
10	G0		L	L	2013	0
10	G0		L	L	2013	0
10	G0		L	L	2013	1	1	1
10	G0		L	L	2013	1	0
11	G0		M	M	2013	0
11	G0		M	M	2013	0
11	G0		M	M	2013	0
11	G0		M	M	2013	0
11	G0		M	M	2013	0
11	G0		M	M	2013	0
11	G0		M	M	2013	0
11	G0		M	M	2013	0
11	G0		M	M	2013	0
11	G0		M	M	2013	1	0
11	G0		M	M	2013	0
11	G0		M	M	2013	0
11	G0		M	M	2013	0
11	G0		M	M	2013	0
11	G0		M	M	2013	0
11	G0		M	M	2013	0
11	G0		M	M	2013	0
11	G0		M	M	2013	0
11	G0		M	M	2013	0
11	G0		M	M	2013	1	1
11	G0		M	M	2013	1	1	1
12	G0		M	M	2013	0
12	G0		M	M	2013	1	1	1
12	G0		M	M	2013	0
12	G0		M	M	2013	1	1	1
12	G0		M	M	2013	1	1
12	G0		M	M	2013	1	1
12	G0		M	M	2013	0
12	G0		M	M	2013	0
12	G0		M	M	2013	0
12	G0		M	M	2013	0
12	G0		M	M	2013	0
12	G0		M	M	2013	0
12	G0		M	M	2013	0
12	G0		M	M	2013	1	1	1
12	G0		M	M	2013	0
12	G0		M	M	2013	0
12	G0		M	M	2013	0
12	G0		M	M	2013	0
12	G0		M	M	2013	1	1	1
12	G0		M	M	2013	1	1
12	G0		M	M	2013	1	0
13	G0		M	M	2013	0
13	G0		M	M	2013	0
13	G0		M	M	2013	0
13	G0		M	M	2013	0
13	G0		M	M	2013	0
13	G0		M	M	2013	0
13	G0		M	M	2013	1	0
13	G0		M	M	2013	1	1	1
13	G0		M	M	2013	1	0
13	G0		M	M	2013	0
13	G0		M	M	2013	0
13	G0		M	M	2013	0
13	G0		M	M	2013	1	1	1
13	G0		M	M	2013	0
13	G0		M	M	2013	1	1
13	G0		M	M	2013	0
13	G0		M	M	2013	0
13	G0		M	M	2013	0
13	G0		M	M	2013	0
13	G0		M	M	2013	1	1
13	G0		M	M	2013	1	1	1
14	G0		M	M	2013	0
14	G0		M	M	2013	1	1	1
14	G0		M	M	2013	0
14	G0		M	M	2013	0
14	G0		M	M	2013	1	1	1
14	G0		M	M	2013	1	1
14	G0		M	M	2013	1	1
14	G0		M	M	2013	1	1	1
14	G0		M	M	2013	0
14	G0		M	M	2013	1	0
14	G0		M	M	2013	0
14	G0		M	M	2013	1	1
14	G0		M	M	2013	0
14	G0		M	M	2013	0
14	G0		M	M	2013	1	1	1
14	G0		M	M	2013	1	0
14	G0		M	M	2013	1	0
14	G0		M	M	2013	0
14	G0		M	M	2013	0
14	G0		M	M	2013	0
14	G0		M	M	2013	0
15	G0		L	L	2013	0
15	G0		L	L	2013	1	1
15	G0		L	L	2013	1	1	1
15	G0		L	L	2013	1	1
15	G0		L	L	2013	0
15	G0		L	L	2013	1	1	1
15	G0		L	L	2013	0
15	G0		L	L	2013	0
15	G0		L	L	2013	1	0
15	G0		L	L	2013	0
15	G0		L	L	2013	1	1	1
15	G0		L	L	2013	1	1
15	G0		L	L	2013	0
15	G0		L	L	2013	1	1	1
15	G0		L	L	2013	0
15	G0		L	L	2013	1	1	1
15	G0		L	L	2013	1	0
15	G0		L	L	2013	0
15	G0		L	L	2013	0
15	G0		L	L	2013	1	1	1
15	G0		L	L	2013	0
16	G0		L	L	2013	0
16	G0		L	L	2013	1	1	1
16	G0		L	L	2013	0
16	G0		L	L	2013	0
16	G0		L	L	2013	0
16	G0		L	L	2013	0
16	G0		L	L	2013	0
16	G0		L	L	2013	0
16	G0		L	L	2013	1	0
16	G0		L	L	2013	0
16	G0		L	L	2013	0
16	G0		L	L	2013	1	1	1
16	G0		L	L	2013	1	0
16	G0		L	L	2013	0
16	G0		L	L	2013	1	1	1
16	G0		L	L	2013	0
16	G0		L	L	2013	0
16	G0		L	L	2013	0
16	G0		L	L	2013	0
16	G0		L	L	2013	1	1	1
16	G0		L	L	2013	0
1	G0		L	M	2014	1	1	1
1	G0		L	M	2014	1	1
1	G0		L	M	2014	1	0
1	G0		L	M	2014	0
1	G0		L	M	2014	0
1	G0		L	M	2014	1	1	1
1	G0		L	M	2014	0
1	G0		L	M	2014	0
1	G0		L	M	2014	0
1	G0		L	M	2014	1	1	1
1	G0		L	M	2014	1	1
1	G0		L	M	2014	1	1
1	G0		L	M	2014	0
1	G0		L	M	2014	1	1
1	G0		L	M	2014	1	1	1
1	G0		L	M	2014	0	1
1	G0		L	M	2014	0
1	G0		L	M	2014	1	1
1	G0		L	M	2014	1	0
1	G0		L	M	2014	1	1	1
1	G0		L	M	2014	1	1
1	G0		L	M	2014	1	1	1
1	G0		L	M	2014	1	1
1	G0		L	M	2014	1	1
1	G0		L	M	2014	0
1	G0		L	M	2014	1	1	1
1	G0		L	M	2014	0
1	G0		L	M	2014	1	1
2	G0		L	M	2014	1	1	1
2	G0		L	M	2014	1	1
2	G0		L	M	2014	1	1
2	G0		L	M	2014	1	1
2	G0		L	M	2014	1	1	1
2	G0		L	M	2014	1	0
2	G0		L	M	2014	1	1
2	G0		L	M	2014	0
2	G0		L	M	2014	1	1	1
2	G0		L	M	2014	1	1
2	G0		L	M	2014	1	1
2	G0		L	M	2014	1	1
2	G0		L	M	2014	1	1
2	G0		L	M	2014	1	1	1
2	G0		L	M	2014	0
2	G0		L	M	2014	1	1
2	G0		L	M	2014	1	1
2	G0		L	M	2014	1	1	1
2	G0		L	M	2014	1	1
2	G0		L	M	2014	1	1
2	G0		L	M	2014	1	1
2	G0		L	M	2014	1	1	1
2	G0		L	M	2014	1	1
2	G0		L	M	2014	1	1
2	G0		L	M	2014	1	1
2	G0		L	M	2014	1	1	1
2	G0		L	M	2014	0
2	G0		L	M	2014	0
3	G0		M	L	2014	1	1	1
3	G0		M	L	2014	0
3	G0		M	L	2014	1	1
3	G0		M	L	2014	0
3	G0		M	L	2014	1	1
3	G0		M	L	2014	1	1	1
3	G0		M	L	2014	1	1
3	G0		M	L	2014	1	0
3	G0		M	L	2014	1	0
3	G0		M	L	2014	1	1	1
3	G0		M	L	2014	0
3	G0		M	L	2014	0
3	G0		M	L	2014	1	1	1
3	G0		M	L	2014	0
3	G0		M	L	2014	0
3	G0		M	L	2014	0
3	G0		M	L	2014	1	1	1
3	G0		M	L	2014	1	1
3	G0		M	L	2014	1	1
3	G0		M	L	2014	1	1
3	G0		M	L	2014	1	1	1
3	G0		M	L	2014	1	1
3	G0		M	L	2014	1	1
3	G0		M	L	2014	1	1
3	G0		M	L	2014	0
3	G0		M	L	2014	1	1
3	G0		M	L	2014	1	1	1
3	G0		M	L	2014	1	1
4	G0		M	L	2014	1	1	1
4	G0		M	L	2014	0
4	G0		M	L	2014	0
4	G0		M	L	2014	1	1
4	G0		M	L	2014	0
4	G0		M	L	2014	0
4	G0		M	L	2014	0
4	G0		M	L	2014	1	1	1
4	G0		M	L	2014	0
4	G0		M	L	2014	1	1	1
4	G0		M	L	2014	1	1
4	G0		M	L	2014	1	1
4	G0		M	L	2014	0
4	G0		M	L	2014	1	1	1
4	G0		M	L	2014	1	0
4	G0		M	L	2014	0
4	G0		M	L	2014	0
4	G0		M	L	2014	1	1	1
4	G0		M	L	2014	0
4	G0		M	L	2014	0
4	G0		M	L	2014	0
4	G0		M	L	2014	1	1	1
4	G0		M	L	2014	0
4	G0		M	L	2014	1	1
4	G0		M	L	2014	0
4	G0		M	L	2014	1	1	1
4	G0		M	L	2014	0
4	G0		M	L	2014	1	1
5	G0		M	L	2014	0
5	G0		M	L	2014	1	0
5	G0		M	L	2014	1	0
5	G0		M	L	2014	1	1	1
5	G0		M	L	2014	0
5	G0		M	L	2014	0
5	G0		M	L	2014	1	1	1
5	G0		M	L	2014	0
5	G0		M	L	2014	0
5	G0		M	L	2014	0
5	G0		M	L	2014	0
5	G0		M	L	2014	1	0
5	G0		M	L	2014	1	1	1
5	G0		M	L	2014	1	0
5	G0		M	L	2014	1	0
5	G0		M	L	2014	1	1
5	G0		M	L	2014	0
5	G0		M	L	2014	0
5	G0		M	L	2014	1	0
5	G0		M	L	2014	1	1	1
5	G0		M	L	2014	0
5	G0		M	L	2014	1	0
5	G0		M	L	2014	0
5	G0		M	L	2014	0
5	G0		M	L	2014	0
5	G0		M	L	2014	0
5	G0		M	L	2014	0
5	G0		M	L	2014	1	0
6	G0		M	L	2014	0
6	G0		M	L	2014	0
6	G0		M	L	2014	0
6	G0		M	L	2014	1	0
6	G0		M	L	2014	0
6	G0		M	L	2014	1	1	1
6	G0		M	L	2014	0
6	G0		M	L	2014	1	1
6	G0		M	L	2014	1	1	1
6	G0		M	L	2014	1	1
6	G0		M	L	2014	0
6	G0		M	L	2014	1	0
6	G0		M	L	2014	1	1
6	G0		M	L	2014	0
6	G0		M	L	2014	1	0
6	G0		M	L	2014	1	1	1
6	G0		M	L	2014	1	0
6	G0		M	L	2014	0
6	G0		M	L	2014	1	0
6	G0		M	L	2014	0
6	G0		M	L	2014	0
6	G0		M	L	2014	1	0
6	G0		M	L	2014	1	0
6	G0		M	L	2014	0
6	G0		M	L	2014	1	0
6	G0		M	L	2014	0
6	G0		M	L	2014	1	0
6	G0		M	L	2014	0
7	G0		L	M	2014	0
7	G0		L	M	2014	1	1	1
7	G0		L	M	2014	1	1
7	G0		L	M	2014	1	1
7	G0		L	M	2014	0
7	G0		L	M	2014	1	1	1
7	G0		L	M	2014	1	1
7	G0		L	M	2014	1	1
7	G0		L	M	2014	1	1
7	G0		L	M	2014	1	1	1
7	G0		L	M	2014	1	0
7	G0		L	M	2014	0
7	G0		L	M	2014	1	1
7	G0		L	M	2014	1	1	1
7	G0		L	M	2014	1	1
7	G0		L	M	2014	1	1
7	G0		L	M	2014	1	0
7	G0		L	M	2014	1	1	1
7	G0		L	M	2014	1	1
7	G0		L	M	2014	1	1
7	G0		L	M	2014	1	1
7	G0		L	M	2014	0
7	G0		L	M	2014	1	1
7	G0		L	M	2014	1	1	1
7	G0		L	M	2014	1	1
7	G0		L	M	2014	1	1
7	G0		L	M	2014	1	1	1
7	G0		L	M	2014	1	1
8	G0		L	M	2014	0
8	G0		L	M	2014	0
8	G0		L	M	2014	0
8	G0		L	M	2014	1	1	1
8	G0		L	M	2014	0
8	G0		L	M	2014	0
8	G0		L	M	2014	1	0
8	G0		L	M	2014	0
8	G0		L	M	2014	1	1
8	G0		L	M	2014	1	1	1
8	G0		L	M	2014	1	0
8	G0		L	M	2014	1	1
8	G0		L	M	2014	1	1	1
8	G0		L	M	2014	0
8	G0		L	M	2014	0
8	G0		L	M	2014	0
8	G0		L	M	2014	0
8	G0		L	M	2014	0
8	G0		L	M	2014	0
8	G0		L	M	2014	0
8	G0		L	M	2014	1	1	1
8	G0		L	M	2014	1	0
8	G0		L	M	2014	1	0
8	G0		L	M	2014	0
8	G0		L	M	2014	1	0
8	G0		L	M	2014	1	0
8	G0		L	M	2014	1	0
8	G0		L	M	2014	0
9	G0		L	L	2014	1	0
9	G0		L	L	2014	1	1
9	G0		L	L	2014	1	1	1
9	G0		L	L	2014	1	1
9	G0		L	L	2014	0
9	G0		L	L	2014	0
9	G0		L	L	2014	1	1	1
9	G0		L	L	2014	0
9	G0		L	L	2014	1	1
9	G0		L	L	2014	1	1
9	G0		L	L	2014	1	1	1
9	G0		L	L	2014	1	1
9	G0		L	L	2014	1	1
9	G0		L	L	2014	1	1
9	G0		L	L	2014	1	1	1
9	G0		L	L	2014	1	1
9	G0		L	L	2014	1	1
9	G0		L	L	2014	1	1	1
9	G0		L	L	2014	0
9	G0		L	L	2014	0
9	G0		L	L	2014	1	1
9	G0		L	L	2014	0
9	G0		L	L	2014	1	1
9	G0		L	L	2014	1	1	1
9	G0		L	L	2014	0
9	G0		L	L	2014	1	1
9	G0		L	L	2014	1	1	1
9	G0		L	L	2014	1	1
10	G0		L	L	2014	0
10	G0		L	L	2014	0
10	G0		L	L	2014	1	1	1
10	G0		L	L	2014	1	0
10	G0		L	L	2014	1	1	1
10	G0		L	L	2014	1	1
10	G0		L	L	2014	0
10	G0		L	L	2014	1	1
10	G0		L	L	2014	1	1	1
10	G0		L	L	2014	1	1
10	G0		L	L	2014	1	0
10	G0		L	L	2014	1	1
10	G0		L	L	2014	0
10	G0		L	L	2014	0
10	G0		L	L	2014	0
10	G0		L	L	2014	0
10	G0		L	L	2014	1	1
10	G0		L	L	2014	0
10	G0		L	L	2014	1	1	1
10	G0		L	L	2014	0
10	G0		L	L	2014	1	1
10	G0		L	L	2014	1	1
10	G0		L	L	2014	0
10	G0		L	L	2014	1	1	1
10	G0		L	L	2014	0
10	G0		L	L	2014	1	1	1
10	G0		L	L	2014	1	1
10	G0		L	L	2014	1	1
11	G0		M	M	2014	0
11	G0		M	M	2014	1	1	1
11	G0		M	M	2014	1	0
11	G0		M	M	2014	1	0
11	G0		M	M	2014	0
11	G0		M	M	2014	0
11	G0		M	M	2014	0
11	G0		M	M	2014	1	1	1
11	G0		M	M	2014	1	1
11	G0		M	M	2014	0
11	G0		M	M	2014	1	1	1
11	G0		M	M	2014	0
11	G0		M	M	2014	1	0
11	G0		M	M	2014	0
11	G0		M	M	2014	1	1	1
11	G0		M	M	2014	0
11	G0		M	M	2014	1	0
11	G0		M	M	2014	0
11	G0		M	M	2014	1	0
11	G0		M	M	2014	0
11	G0		M	M	2014	1	1
11	G0		M	M	2014	1	1
11	G0		M	M	2014	1	1
11	G0		M	M	2014	1	1	1
11	G0		M	M	2014	0
11	G0		M	M	2014	0
11	G0		M	M	2014	1	1	1
11	G0		M	M	2014	0
12	G0		M	M	2014	0
12	G0		M	M	2014	0
12	G0		M	M	2014	0
12	G0		M	M	2014	1	0
12	G0		M	M	2014	0
12	G0		M	M	2014	0
12	G0		M	M	2014	1	0
12	G0		M	M	2014	0
12	G0		M	M	2014	0
12	G0		M	M	2014	0
12	G0		M	M	2014	1	1	1
12	G0		M	M	2014	0
12	G0		M	M	2014	1	1
12	G0		M	M	2014	0
12	G0		M	M	2014	1	1	1
12	G0		M	M	2014	0
12	G0		M	M	2014	1	1
12	G0		M	M	2014	1	1
12	G0		M	M	2014	1	1	1
12	G0		M	M	2014	1	1
12	G0		M	M	2014	0
12	G0		M	M	2014	1	1	1
12	G0		M	M	2014	1	0
12	G0		M	M	2014	0
12	G0		M	M	2014	1	1
12	G0		M	M	2014	1	1	1
12	G0		M	M	2014	1	1
12	G0		M	M	2014	1	1
13	G0		M	M	2014	0
13	G0		M	M	2014	1	1	1
13	G0		M	M	2014	1	1
13	G0		M	M	2014	1	0
13	G0		M	M	2014	0
13	G0		M	M	2014	1	1
13	G0		M	M	2014	1	1	1
13	G0		M	M	2014	1	1
13	G0		M	M	2014	1	0
13	G0		M	M	2014	0
13	G0		M	M	2014	0
13	G0		M	M	2014	0
13	G0		M	M	2014	1	1
13	G0		M	M	2014	1	1
13	G0		M	M	2014	1	1	1
13	G0		M	M	2014	1
13	G0		M	M	2014	1	1
13	G0		M	M	2014	1	1	1
13	G0		M	M	2014	1	1
13	G0		M	M	2014	0
13	G0		M	M	2014	1	1
13	G0		M	M	2014	0
13	G0		M	M	2014	1	0
13	G0		M	M	2014	1	1	1
13	G0		M	M	2014	0
13	G0		M	M	2014	1	0
13	G0		M	M	2014	0
13	G0		M	M	2014	1	0
14	G0		M	M	2014	1	0
14	G0		M	M	2014	1	1
14	G0		M	M	2014	1	1	1
14	G0		M	M	2014	1	1
14	G0		M	M	2014	1	1
14	G0		M	M	2014	1	1	1
14	G0		M	M	2014	0
14	G0		M	M	2014	0
14	G0		M	M	2014	0
14	G0		M	M	2014	0
14	G0		M	M	2014	0
14	G0		M	M	2014	1	1	1
14	G0		M	M	2014	1	1
14	G0		M	M	2014	0
14	G0		M	M	2014	0
14	G0		M	M	2014	1	1	1
14	G0		M	M	2014	1	0
14	G0		M	M	2014	0
14	G0		M	M	2014	1	1	1
14	G0		M	M	2014	0
14	G0		M	M	2014	1	1	1
14	G0		M	M	2014	0
14	G0		M	M	2014	1	0
14	G0		M	M	2014	0
14	G0		M	M	2014	1	0
14	G0		M	M	2014	0
14	G0		M	M	2014	1	0
14	G0		M	M	2014	1	0
15	G0		L	L	2014	1	1	1
15	G0		L	L	2014	1	1
15	G0		L	L	2014	0
15	G0		L	L	2014	0
15	G0		L	L	2014	1	1	1
15	G0		L	L	2014	1	1
15	G0		L	L	2014	1	1
15	G0		L	L	2014	0
15	G0		L	L	2014	1	1
15	G0		L	L	2014	0
15	G0		L	L	2014	1	1	1
15	G0		L	L	2014	0
15	G0		L	L	2014	1	1	1
15	G0		L	L	2014	1	0
15	G0		L	L	2014	0
15	G0		L	L	2014	0
15	G0		L	L	2014	1	1
15	G0		L	L	2014	0
15	G0		L	L	2014	1	1	1
15	G0		L	L	2014	0
15	G0		L	L	2014	0
15	G0		L	L	2014	1	0
15	G0		L	L	2014	1	1	1
15	G0		L	L	2014	0
15	G0		L	L	2014	1	1
15	G0		L	L	2014	0
15	G0		L	L	2014	0
15	G0		L	L	2014	1	1	1
16	G0		L	L	2014	1	0
16	G0		L	L	2014	0
16	G0		L	L	2014	1	1	1
16	G0		L	L	2014	0
16	G0		L	L	2014	0
16	G0		L	L	2014	1	1	1
16	G0		L	L	2014	0
16	G0		L	L	2014	1	1
16	G0		L	L	2014	1	0
16	G0		L	L	2014	1	1
16	G0		L	L	2014	1	1	1
16	G0		L	L	2014	1	1
16	G0		L	L	2014	1	1	1
16	G0		L	L	2014	1	1
16	G0		L	L	2014	1	1
16	G0		L	L	2014	0
16	G0		L	L	2014	0
16	G0		L	L	2014	0
16	G0		L	L	2014	1	1	1
16	G0		L	L	2014	1	0
16	G0		L	L	2014	1	1	1
16	G0		L	L	2014	1	1
16	G0		L	L	2014	1	1
16	G0		L	L	2014	1
16	G0		L	L	2014	1	0
16	G0		L	L	2014	1	1
16	G0		L	L	2014	1	1	1
16	G0		L	L	2014	1	1
1	G0		M	L	2015	0
1	G0		M	L	2015	1	0
1	G0		M	L	2015	1	1
1	G0		M	L	2015	1	1	1
1	G0		M	L	2015	1	1
1	G0		M	L	2015	1	1
1	G0		M	L	2015	1	1	1
1	G0		M	L	2015	0
1	G0		M	L	2015	1	1
1	G0		M	L	2015	0
1	G0		M	L	2015	1	1
1	G0		M	L	2015	1	1	1
1	G0		M	L	2015	1	1	1
1	G0		M	L	2015	0
1	G0		M	L	2015	0
1	G0		M	L	2015	0
1	G0		M	L	2015	0
1	G0		M	L	2015	1	1	1
1	G0		M	L	2015	0
1	G0		M	L	2015	0
1	G0		M	L	2015	1	1	1
1	G0		M	L	2015	1	1
1	G0		M	L	2015	1	1
1	G0		M	L	2015	0
1	G0		M	L	2015	1	1	1
1	G0		M	L	2015	1	0
1	G0		M	L	2015	1	1
1	G0		M	L	2015	1	1
2	G0		M	L	2015	0
2	G0		M	L	2015	0
2	G0		M	L	2015	1	1
2	G0		M	L	2015	1	1	1
2	G0		M	L	2015	1	0
2	G0		M	L	2015	0
2	G0		M	L	2015	0
2	G0		M	L	2015	1	1	1
2	G0		M	L	2015	0
2	G0		M	L	2015	1	1	1
2	G0		M	L	2015	0
2	G0		M	L	2015	0
2	G0		M	L	2015	0
2	G0		M	L	2015	0
2	G0		M	L	2015	1	1	1
2	G0		M	L	2015	1	0
2	G0		M	L	2015	0
2	G0		M	L	2015	1	1
2	G0		M	L	2015	1	1	1
2	G0		M	L	2015	1	0
2	G0		M	L	2015	0
2	G0		M	L	2015	0
2	G0		M	L	2015	0
2	G0		M	L	2015	1	1	1
2	G0		M	L	2015	1	1	1
2	G0		M	L	2015	0
2	G0		M	L	2015	1	1
2	G0		M	L	2015	1	0
3	G0		L	M	2015	0
3	G0		L	M	2015	0
3	G0		L	M	2015	0
3	G0		L	M	2015	1	1	1
3	G0		L	M	2015	1	0
3	G0		L	M	2015	0
3	G0		L	M	2015	0
3	G0		L	M	2015	0
3	G0		L	M	2015	0
3	G0		L	M	2015	1	0
3	G0		L	M	2015	1	0
3	G0		L	M	2015	1	1	1
3	G0		L	M	2015	0
3	G0		L	M	2015	0
3	G0		L	M	2015	0
3	G0		L	M	2015	1	0
3	G0		L	M	2015	0
3	G0		L	M	2015	1	1	1
3	G0		L	M	2015	1	1
3	G0		L	M	2015	0
3	G0		L	M	2015	1	1
3	G0		L	M	2015	0
3	G0		L	M	2015	0
3	G0		L	M	2015	1	1	1
3	G0		L	M	2015	1	1	1
3	G0		L	M	2015	0
3	G0		L	M	2015	0
3	G0		L	M	2015	0
4	G0		L	M	2015	1	1
4	G0		L	M	2015	1	1	1
4	G0		L	M	2015	1	1
4	G0		L	M	2015	1	1
4	G0		L	M	2015	0
4	G0		L	M	2015	0
4	G0		L	M	2015	1	1	1
4	G0		L	M	2015	0
4	G0		L	M	2015	1	1	1
4	G0		L	M	2015	1	0
4	G0		L	M	2015	0
4	G0		L	M	2015	1	0
4	G0		L	M	2015	0
4	G0		L	M	2015	0
4	G0		L	M	2015	1	1	1
4	G0		L	M	2015	0
4	G0		L	M	2015	1	1	1
4	G0		L	M	2015	1	1
4	G0		L	M	2015	0
4	G0		L	M	2015	1	1
4	G0		L	M	2015	1	0
4	G0		L	M	2015	1	1
4	G0		L	M	2015	1	1	1
4	G0		L	M	2015	0
4	G0		L	M	2015	0
4	G0		L	M	2015	1	1	1
4	G0		L	M	2015	0
4	G0		L	M	2015	0
5	G0		L	M	2015	1	0
5	G0		L	M	2015	0
5	G0		L	M	2015	1	1	1
5	G0		L	M	2015	1	0
5	G0		L	M	2015	0
5	G0		L	M	2015	1	1	1
5	G0		L	M	2015	0
5	G0		L	M	2015	1	1
5	G0		L	M	2015	0
5	G0		L	M	2015	1	0
5	G0		L	M	2015	1	1
5	G0		L	M	2015	1	1	1
5	G0		L	M	2015	0
5	G0		L	M	2015	0
5	G0		L	M	2015	1	1	1
5	G0		L	M	2015	0
5	G0		L	M	2015	1	1
5	G0		L	M	2015	1	1	1
5	G0		L	M	2015	1	1
5	G0		L	M	2015	0
5	G0		L	M	2015	0
5	G0		L	M	2015	0
5	G0		L	M	2015	0
5	G0		L	M	2015	0
5	G0		L	M	2015	1	1	1
5	G0		L	M	2015	0
5	G0		L	M	2015	1	1
5	G0		L	M	2015	0
6	G0		L	M	2015	1	1	1
6	G0		L	M	2015	1	0
6	G0		L	M	2015	0
6	G0		L	M	2015	0
6	G0		L	M	2015	0
6	G0		L	M	2015	0
6	G0		L	M	2015	0
6	G0		L	M	2015	0
6	G0		L	M	2015	0
6	G0		L	M	2015	0
6	G0		L	M	2015	1	1	1
6	G0		L	M	2015	0
6	G0		L	M	2015	0
6	G0		L	M	2015	1	1	1
6	G0		L	M	2015	1	0
6	G0		L	M	2015	1	1
6	G0		L	M	2015	1	1
6	G0		L	M	2015	1	1	1
6	G0		L	M	2015	1	0
6	G0		L	M	2015	0
6	G0		L	M	2015	1	1	1
6	G0		L	M	2015	1	1
6	G0		L	M	2015	0
6	G0		L	M	2015	0
6	G0		L	M	2015	1	0
6	G0		L	M	2015	0
6	G0		L	M	2015	1	1	1
6	G0		L	M	2015	0
7	G0		M	L	2015	0
7	G0		M	L	2015	1	1
7	G0		M	L	2015	0
7	G0		M	L	2015	1	1	1
7	G0		M	L	2015	0
7	G0		M	L	2015	1	1	1
7	G0		M	L	2015	1	1
7	G0		M	L	2015	1	1
7	G0		M	L	2015	0
7	G0		M	L	2015	0
7	G0		M	L	2015	1		1
7	G0		M	L	2015	0
7	G0		M	L	2015	1	1	1
7	G0		M	L	2015	0
7	G0		M	L	2015	1	1
7	G0		M	L	2015	1	1
7	G0		M	L	2015	1	1	1
7	G0		M	L	2015	0
7	G0		M	L	2015	1	1
7	G0		M	L	2015	0
7	G0		M	L	2015	0
7	G0		M	L	2015	0
7	G0		M	L	2015	0
7	G0		M	L	2015	0
7	G0		M	L	2015	1	0
7	G0		M	L	2015	1	1	1
7	G0		M	L	2015	0
7	G0		M	L	2015	0
8	G0		M	L	2015	0
8	G0		M	L	2015	0
8	G0		M	L	2015	0
8	G0		M	L	2015	1	1	1
8	G0		M	L	2015	0
8	G0		M	L	2015	0
8	G0		M	L	2015	1	1	1
8	G0		M	L	2015	0
8	G0		M	L	2015	1	1	1
8	G0		M	L	2015	1	0
8	G0		M	L	2015	1	1
8	G0		M	L	2015	0
8	G0		M	L	2015	1	1
8	G0		M	L	2015	1	1	1
8	G0		M	L	2015	1	1
8	G0		M	L	2015	1	1
8	G0		M	L	2015	1	1	1
8	G0		M	L	2015	1	1
8	G0		M	L	2015	1	1
8	G0		M	L	2015	0
8	G0		M	L	2015	1	0
8	G0		M	L	2015	0
8	G0		M	L	2015	1	1
8	G0		M	L	2015	1	1	1
8	G0		M	L	2015	0
8	G0		M	L	2015	1	1	1
8	G0		M	L	2015	0
8	G0		M	L	2015	0
9	G0		L	L	2015	0
9	G0		L	L	2015	1	1	1
9	G0		L	L	2015	1	0
9	G0		L	L	2015	0
9	G0		L	L	2015	1	1
9	G0		L	L	2015	1	0
9	G0		L	L	2015	1	1	1
9	G0		L	L	2015	0
9	G0		L	L	2015	0
9	G0		L	L	2015	0
9	G0		L	L	2015	0
9	G0		L	L	2015	1	1	1
9	G0		L	L	2015	1	1	1
9	G0		L	L	2015	1	0
9	G0		L	L	2015	0
9	G0		L	L	2015	0
9	G0		L	L	2015	0
9	G0		L	L	2015	0
9	G0		L	L	2015	1	1
9	G0		L	L	2015	1	1	1
9	G0		L	L	2015	1	1
9	G0		L	L	2015	1	0
9	G0		L	L	2015	1	1	1
9	G0		L	L	2015	0
9	G0		L	L	2015	1	1	1
9	G0		L	L	2015	1	0
9	G0		L	L	2015	1	1
9	G0		L	L	2015	1	0
10	G0		L	L	2015	1	0
10	G0		L	L	2015	1	1	1
10	G0		L	L	2015	1	0
10	G0		L	L	2015	0
10	G0		L	L	2015	0
10	G0		L	L	2015	1	1
10	G0		L	L	2015	1	1	1
10	G0		L	L	2015	0
10	G0		L	L	2015	1	1	1
10	G0		L	L	2015	1	1
10	G0		L	L	2015	1	1
10	G0		L	L	2015	1	0
10	G0		L	L	2015	1	1	1
10	G0		L	L	2015	0
10	G0		L	L	2015	0
10	G0		L	L	2015	1	0
10	G0		L	L	2015	0
10	G0		L	L	2015	1	0
10	G0		L	L	2015	1	1	1
10	G0		L	L	2015	1	0
10	G0		L	L	2015	1	1	1
10	G0		L	L	2015	1	1
10	G0		L	L	2015	0
10	G0		L	L	2015	1	1
10	G0		L	L	2015	1	1	1
10	G0		L	L	2015	1	0
10	G0		L	L	2015	1	1
10	G0		L	L	2015	0
11	G0		M	M	2015	1	0
11	G0		M	M	2015	0
11	G0		M	M	2015	1	1
11	G0		M	M	2015	1	1	1
11	G0		M	M	2015	1	0
11	G0		M	M	2015	1	0
11	G0		M	M	2015	1	1	1
11	G0		M	M	2015	0
11	G0		M	M	2015	1	0
11	G0		M	M	2015	0
11	G0		M	M	2015	0
11	G0		M	M	2015	0
11	G0		M	M	2015	1	1
11	G0		M	M	2015	1	0
11	G0		M	M	2015	0
11	G0		M	M	2015	1	1	1
11	G0		M	M	2015	1	0
11	G0		M	M	2015	0
11	G0		M	M	2015	0
11	G0		M	M	2015	1	1	1
11	G0		M	M	2015	0
11	G0		M	M	2015	1	0
11	G0		M	M	2015	1	1	1
11	G0		M	M	2015	1	1
11	G0		M	M	2015	1	1	1
11	G0		M	M	2015	0
11	G0		M	M	2015	1	0
11	G0		M	M	2015	1	1
12	G0		M	M	2015	1	1	1
12	G0		M	M	2015	0
12	G0		M	M	2015	1	1
12	G0		M	M	2015	0
12	G0		M	M	2015	0
12	G0		M	M	2015	0
12	G0		M	M	2015	1	1	1
12	G0		M	M	2015	0
12	G0		M	M	2015	1	1
12	G0		M	M	2015	1	1	1
12	G0		M	M	2015	0
12	G0		M	M	2015	0
12	G0		M	M	2015	0
12	G0		M	M	2015	1	1	1
12	G0		M	M	2015	0
12	G0		M	M	2015	0
12	G0		M	M	2015	1	0
12	G0		M	M	2015	0
12	G0		M	M	2015	0
12	G0		M	M	2015	0
12	G0		M	M	2015	0
12	G0		M	M	2015	1	0
12	G0		M	M	2015	1	1	1
12	G0		M	M	2015	0
12	G0		M	M	2015	1	1
12	G0		M	M	2015	1	0
12	G0		M	M	2015	1	1	1
12	G0		M	M	2015	1	1
13	G0		M	M	2015	0
13	G0		M	M	2015	0
13	G0		M	M	2015	0
13	G0		M	M	2015	0
13	G0		M	M	2015	0
13	G0		M	M	2015	0
13	G0		M	M	2015	1	1	1
13	G0		M	M	2015	1	0
13	G0		M	M	2015	1	1	1
13	G0		M	M	2015	0
13	G0		M	M	2015	0
13	G0		M	M	2015	1	1
13	G0		M	M	2015	1	1	1
13	G0		M	M	2015	0
13	G0		M	M	2015	1	1
13	G0		M	M	2015	0
13	G0		M	M	2015	0
13	G0		M	M	2015	0
13	G0		M	M	2015	0
13	G0		M	M	2015	1	0
13	G0		M	M	2015	1	0
13	G0		M	M	2015	0
13	G0		M	M	2015	1	1	1
13	G0		M	M	2015	1	0
13	G0		M	M	2015	1	1	1
13	G0		M	M	2015	1	0
13	G0		M	M	2015	1	0
13	G0		M	M	2015	0
14	G0		M	M	2015	0
14	G0		M	M	2015	1	0
14	G0		M	M	2015	0
14	G0		M	M	2015	1	1	1
14	G0		M	M	2015	0
14	G0		M	M	2015	1	1
14	G0		M	M	2015	1	1	1
14	G0		M	M	2015	1	1
14	G0		M	M	2015	1	1
14	G0		M	M	2015	1	1
14	G0		M	M	2015	1	1	1
14	G0		M	M	2015	1	1
14	G0		M	M	2015	1	1	1
14	G0		M	M	2015	1	0
14	G0		M	M	2015	0
14	G0		M	M	2015	1	1
14	G0		M	M	2015	0
14	G0		M	M	2015	0
14	G0		M	M	2015	0
14	G0		M	M	2015	0
14	G0		M	M	2015	1	1	1
14	G0		M	M	2015	1	1
14	G0		M	M	2015	1	1
14	G0		M	M	2015	0
14	G0		M	M	2015	0
14	G0		M	M	2015	1	0
14	G0		M	M	2015	0
14	G0		M	M	2015	0
15	G0		L	L	2015	1	0
15	G0		L	L	2015	1	1	1
15	G0		L	L	2015	1	1
15	G0		L	L	2015	1	0
15	G0		L	L	2015	1	0
15	G0		L	L	2015	1	1	1
15	G0		L	L	2015	0
15	G0		L	L	2015	1	1
15	G0		L	L	2015	0
15	G0		L	L	2015	0
15	G0		L	L	2015	0
15	G0		L	L	2015	1	1	1
15	G0		L	L	2015	0
15	G0		L	L	2015	0
15	G0		L	L	2015	0
15	G0		L	L	2015	0
15	G0		L	L	2015	1	1	1
15	G0		L	L	2015	1	1
15	G0		L	L	2015	0
15	G0		L	L	2015	1	1
15	G0		L	L	2015	0
15	G0		L	L	2015	1	1
15	G0		L	L	2015	0
15	G0		L	L	2015	1	1	1
15	G0		L	L	2015	1	1	1
15	G0		L	L	2015	0
15	G0		L	L	2015	1	1
15	G0		L	L	2015	0
16	G0		L	L	2015	0
16	G0		L	L	2015	0
16	G0		L	L	2015	1	1	1
16	G0		L	L	2015	0
16	G0		L	L	2015	1	1	1
16	G0		L	L	2015	1	1
16	G0		L	L	2015	1	1
16	G0		L	L	2015	0
16	G0		L	L	2015	0
16	G0		L	L	2015	1	1
16	G0		L	L	2015	1	1
16	G0		L	L	2015	1	1	1
16	G0		L	L	2015	1	1
16	G0		L	L	2015	0
16	G0		L	L	2015	1	1
16	G0		L	L	2015	1	1	1
16	G0		L	L	2015	0
16	G0		L	L	2015	1	1	1
16	G0		L	L	2015	0
16	G0		L	L	2015	0
16	G0		L	L	2015	1	1
16	G0		L	L	2015	0
16	G0		L	L	2015	1	1	1
16	G0		L	L	2015	1	0
16	G0		L	L	2015	1	0
16	G0		L	L	2015	1	1	1
16	G0		L	L	2015	0
16	G0		L	L	2015	0
1	Gn	5.19	M	L	2013	0
1	Gn	5.19	M	L	2013	1	1	0
1	Gn	5.19	M	L	2013	0
1	Gn	3.16	M	L	2013	0
1	Gn	3.16	M	L	2013	1	0
1	Gn	3.16	M	L	2013	1	1	1
1	Gn	4.14	M	L	2013	0
1	Gn	4.14	M	L	2013	1	0
1	Gn	4.14	M	L	2013	1	1	1
1	Gn	3.12	M	L	2013	1	1
1	Gn	3.12	M	L	2013	1	0
1	Gn	3.12	M	L	2013	1	1	0
1	Gn	5.23	M	L	2013	1	0
1	Gn	5.23	M	L	2013	1	1
1	Gn	5.23	M	L	2013	1	1	1
2	Gn	3.16	M	L	2013	0
2	Gn	3.16	M	L	2013	0
2	Gn	3.16	M	L	2013	1	0
2	Gn	4.2	M	L	2013	0
2	Gn	4.2	M	L	2013	1	1	1
2	Gn	4.2	M	L	2013	1	1
2	Gn	4.2	M	L	2013	1	1
2	Gn	4.2	M	L	2013	1	1
2	Gn	4.2	M	L	2013	1	1	1
2	Gn	4.17	M	L	2013	0
2	Gn	4.17	M	L	2013	0
2	Gn	4.17	M	L	2013	0
2	Gn	3.16	M	L	2013	1	1
2	Gn	3.16	M	L	2013	1	1	1
2	Gn	3.16	M	L	2013	0
7	Gn	4.2	M	L	2013	1	0
7	Gn	4.2	M	L	2013	1	1	0
7	Gn	4.2	M	L	2013	0
7	Gn	3.12	M	L	2013	0
7	Gn	3.12	M	L	2013	1	1	1
7	Gn	3.12	M	L	2013	1
7	Gn	3.16	M	L	2013	1	1	1
7	Gn	3.16	M	L	2013	1	1
7	Gn	3.16	M	L	2013	1	1
7	Gn	3.12	M	L	2013	1	1
7	Gn	3.12	M	L	2013	1	1	1
7	Gn	3.12	M	L	2013	1	1
7	Gn	4.2	M	L	2013	1	1	1
7	Gn	4.2	M	L	2013	0
7	Gn	4.2	M	L	2013	0
7	Gn	5.23	M	L	2013	0
7	Gn	5.23	M	L	2013	0
7	Gn	5.23	M	L	2013	1	0
8	Gn	5.23	M	L	2013	1	1	1
8	Gn	5.23	M	L	2013	1	1
8	Gn	5.23	M	L	2013	1	1
8	Gn	3.12	M	L	2013	1	1	1
8	Gn	3.12	M	L	2013	1	1
8	Gn	3.12	M	L	2013	1	1
8	Gn	3.16	M	L	2013	1	1	1
8	Gn	3.16	M	L	2013	1	1
8	Gn	3.16	M	L	2013	0
8	Gn	5.23	M	L	2013	0
8	Gn	5.23	M	L	2013	0
8	Gn	5.23	M	L	2013	1	1	1
8	Gn	3.12	M	L	2013	0
8	Gn	3.12	M	L	2013	1	1
8	Gn	3.12	M	L	2013	1	1	1
3	Gn	1.19	L	M	2013	0
3	Gn	1.19	L	M	2013	0
3	Gn	1.19	L	M	2013	0
3	Gn	7.18	L	M	2013	0
3	Gn	7.18	L	M	2013	1
3	Gn	7.18	L	M	2013	0
3	Gn	7.18	L	M	2013	0
3	Gn	7.18	L	M	2013	1
3	Gn	7.18	L	M	2013	1	1	1
3	Gn	7.25	L	M	2013	1	1	1
3	Gn	7.25	L	M	2013	1	1
3	Gn	7.25	L	M	2013	1	1
3	Gn	7.25	L	M	2013	0
3	Gn	7.25	L	M	2013	1
3	Gn	7.25	L	M	2013	1
4	Gn	7.25	L	M	2013	0
4	Gn	7.25	L	M	2013	1
4	Gn	7.25	L	M	2013	1
4	Gn	1.27	L	M	2013	1	0
4	Gn	1.27	L	M	2013	1	1	1
4	Gn	1.27	L	M	2013	1	0
4	Gn	7.5	L	M	2013	0
4	Gn	7.5	L	M	2013	0
4	Gn	7.5	L	M	2013	0
4	Gn	7.25	L	M	2013	1
4	Gn	7.25	L	M	2013	1
4	Gn	7.25	L	M	2013	1	1	1
4	Gn	1.27	L	M	2013	0
4	Gn	1.27	L	M	2013	1
4	Gn	1.27	L	M	2013	1	1	1
5	Gn	7.18	L	M	2013	1
5	Gn	7.18	L	M	2013	1	0
5	Gn	7.18	L	M	2013	1
5	Gn	7.5	L	M	2013	0
5	Gn	7.5	L	M	2013	0
5	Gn	7.5	L	M	2013	0
5	Gn	8.5	L	M	2013	0
5	Gn	8.5	L	M	2013	0
5	Gn	8.5	L	M	2013	0
5	Gn	7.5	L	M	2013	0
5	Gn	7.5	L	M	2013	1
5	Gn	7.5	L	M	2013	0
5	Gn	7.18	L	M	2013	1
5	Gn	7.18	L	M	2013	1	1	1
5	Gn	7.18	L	M	2013	1
6	Gn	8.20	L	M	2013	0
6	Gn	8.20	L	M	2013	0
6	Gn	8.20	L	M	2013	0
6	Gn	7.18	L	M	2013	0
6	Gn	7.18	L	M	2013	1
6	Gn	7.18	L	M	2013	1	1	1
6	Gn	7.5	L	M	2013	0
6	Gn	7.5	L	M	2013	0
6	Gn	7.5	L	M	2013	0
6	Gn	1.19	L	M	2013	1
6	Gn	1.19	L	M	2013	1	1
6	Gn	1.19	L	M	2013	1	1	1
6	Gn	1.19	L	M	2013	1	0
6	Gn	1.19	L	M	2013	1
6	Gn	1.19	L	M	2013	1	1	1
6	Gn	7.25	L	M	2013	1	0
6	Gn	7.25	L	M	2013	1	1	1
6	Gn	7.25	L	M	2013	1	1
11	Gn	12.4	M	M	2013	0
11	Gn	12.4	M	M	2013	0
11	Gn	12.4	M	M	2013	0
11	Gn	12.24	M	M	2013	0
11	Gn	12.24	M	M	2013	1	1	1
11	Gn	12.24	M	M	2013	0
11	Gn	14.11	M	M	2013	0
11	Gn	14.11	M	M	2013	0
11	Gn	14.11	M	M	2013	0
11	Gn	12.4	M	M	2013	0
11	Gn	12.4	M	M	2013	0
11	Gn	12.4	M	M	2013	0
11	Gn	12.4	M	M	2013	0
11	Gn	12.4	M	M	2013	0
11	Gn	12.4	M	M	2013	1	1	1
12	Gn	11.21	M	M	2013	1	1	1
12	Gn	11.21	M	M	2013	1	0
12	Gn	11.21	M	M	2013	0
12	Gn	11.9	M	M	2013	1	1
12	Gn	11.9	M	M	2013	0
12	Gn	11.9	M	M	2013	1	1	1
12	Gn	14.6	M	M	2013	0
12	Gn	14.6	M	M	2013	1	0
12	Gn	14.6	M	M	2013	0
12	Gn	14.11	M	M	2013	0
12	Gn	14.11	M	M	2013	0
12	Gn	14.11	M	M	2013	0
12	Gn	14.2	M	M	2013	0
12	Gn	14.2	M	M	2013	0
12	Gn	14.2	M	M	2013	0
12	Gn	11.9	M	M	2013	0
12	Gn	11.9	M	M	2013	1	1	1
12	Gn	11.9	M	M	2013	0
13	Gn	12.24	M	M	2013	1	0
13	Gn	12.24	M	M	2013	0
13	Gn	12.24	M	M	2013	1	0
13	Gn	12.4	M	M	2013	1	1	1
13	Gn	12.4	M	M	2013	1	0
13	Gn	12.4	M	M	2013	1	1
13	Gn	14.17	M	M	2013	0
13	Gn	14.17	M	M	2013	0
13	Gn	14.17	M	M	2013	0
13	Gn	12.4	M	M	2013	1	1	1
13	Gn	12.4	M	M	2013	0
13	Gn	12.4	M	M	2013	0
13	Gn	12.24	M	M	2013	0
13	Gn	12.24	M	M	2013	0
13	Gn	12.24	M	M	2013	0
14	Gn	11.9	M	M	2013	0
14	Gn	11.9	M	M	2013	0
14	Gn	11.9	M	M	2013	0
14	Gn	12.24	M	M	2013	1	1	1
14	Gn	12.24	M	M	2013	0
14	Gn	12.24	M	M	2013	0
14	Gn	11.21	M	M	2013	1	0
14	Gn	11.21	M	M	2013	1	0
14	Gn	11.21	M	M	2013	1	1	1
14	Gn	11.9	M	M	2013	0
14	Gn	11.9	M	M	2013	1	1	1
14	Gn	11.9	M	M	2013	0
14	Gn	11.9	M	M	2013	0
14	Gn	11.9	M	M	2013	0
14	Gn	11.9	M	M	2013	0
9	Gn	15.7	L	L	2013	0
9	Gn	15.7	L	L	2013	0
9	Gn	15.7	L	L	2013	1
9	Gn	16.9	L	L	2013	0
9	Gn	16.9	L	L	2013	1
9	Gn	16.9	L	L	2013	0
9	Gn	16.14	L	L	2013	1
9	Gn	16.14	L	L	2013	1
9	Gn	16.14	L	L	2013	1	0
9	Gn	10.21	L	L	2013	0
9	Gn	10.21	L	L	2013	0
9	Gn	10.21	L	L	2013	0
9	Gn	15.7	L	L	2013	0
9	Gn	15.7	L	L	2013	0
9	Gn	15.7	L	L	2013	0
10	Gn	16.14	L	L	2013	0
10	Gn	16.14	L	L	2013	1
10	Gn	16.14	L	L	2013	0
10	Gn	15.7	L	L	2013	0
10	Gn	15.7	L	L	2013	0
10	Gn	15.7	L	L	2013	0
10	Gn	9.9	L	L	2013	1
10	Gn	9.9	L	L	2013	1
10	Gn	9.9	L	L	2013	1	0
10	Gn	9.9	L	L	2013	0
10	Gn	9.9	L	L	2013	1
10	Gn	9.9	L	L	2013	0
10	Gn	16.14	L	L	2013	0
10	Gn	16.14	L	L	2013	1
10	Gn	16.14	L	L	2013	0
10	Gn	16.9	L	L	2013	1
10	Gn	16.9	L	L	2013	1	1
10	Gn	16.9	L	L	2013	1	1	1
15	Gn	9.1	L	L	2013	0
15	Gn	9.1	L	L	2013	0
15	Gn	9.1	L	L	2013	0
15	Gn	9.9	L	L	2013	1
15	Gn	9.9	L	L	2013	0
15	Gn	9.9	L	L	2013	0
15	Gn	16.14	L	L	2013	1
15	Gn	16.14	L	L	2013	1	1	1
15	Gn	16.14	L	L	2013	1	1
15	Gn	16.14	L	L	2013	0
15	Gn	16.14	L	L	2013	1
15	Gn	16.14	L	L	2013	1	1	1
15	Gn	9.13	L	L	2013	0
15	Gn	9.13	L	L	2013	1
15	Gn	9.13	L	L	2013	0
16	Gn	9.9	L	L	2013	0
16	Gn	9.9	L	L	2013	1
16	Gn	9.9	L	L	2013	0
16	Gn	15.7	L	L	2013	0
16	Gn	15.7	L	L	2013	0
16	Gn	15.7	L	L	2013	0
16	Gn	9.13	L	L	2013	0
16	Gn	9.13	L	L	2013	1
16	Gn	9.13	L	L	2013	1
16	Gn	9.13	L	L	2013	0
16	Gn	9.13	L	L	2013	1
16	Gn	9.13	L	L	2013	1	1	1
16	Gn	9.9	L	L	2013	0
16	Gn	9.9	L	L	2013	0
16	Gn	9.9	L	L	2013	0
1	Gn	7.18	L	M	2014	0
1	Gn	7.18	L	M	2014	1	1	1
1	Gn	7.18	L	M	2014	1	1
1	Gn	7.18	L	M	2014	0
1	Gn	7.18	L	M	2014	1	1
1	Gn	7.18	L	M	2014	0
1	Gn	7.18	L	M	2014	1	1
1	Gn	7.18	L	M	2014	1	1
2	Gn	7.18	L	M	2014	1	1
2	Gn	7.18	L	M	2014	0
2	Gn	7.18	L	M	2014	0
2	Gn	7.18	L	M	2014	1	1
2	Gn	7.18	L	M	2014	0
2	Gn	7.18	L	M	2014	0
2	Gn	7.18	L	M	2014	1	1
2	Gn	7.18	L	M	2014	1	1	1
2	Gn	1.27	L	M	2014	1	1
2	Gn	1.27	L	M	2014	1	1
2	Gn	1.27	L	M	2014	1	1
2	Gn	1.27	L	M	2014	1	1
2	Gn	1.27	L	M	2014	1	1
2	Gn	1.27	L	M	2014	1	1	1
2	Gn	1.27	L	M	2014	1	1
2	Gn	1.27	L	M	2014	1	1
2	Gn	1.27	L	M	2014	0
2	Gn	1.27	L	M	2014	1	1	1
2	Gn	1.27	L	M	2014	1	1
2	Gn	1.27	L	M	2014	1	1
2	Gn	1.27	L	M	2014	1	1
2	Gn	1.27	L	M	2014	1	0
2	Gn	1.27	L	M	2014	1	1
2	Gn	1.27	L	M	2014	1	1
2	Gn	1.19	L	M	2014	1	1
2	Gn	1.19	L	M	2014	1	1
2	Gn	1.19	L	M	2014	0
2	Gn	1.19	L	M	2014	1	1	1
2	Gn	1.19	L	M	2014	1	0
2	Gn	1.19	L	M	2014	0
2	Gn	1.19	L	M	2014	1	1
2	Gn	1.19	L	M	2014	1	1
7	Gn	1.19	L	M	2014	1	1
7	Gn	1.19	L	M	2014	0
7	Gn	1.19	L	M	2014	1	1	1
7	Gn	1.19	L	M	2014	1	1
7	Gn	1.19	L	M	2014	0
7	Gn	1.19	L	M	2014	0
7	Gn	1.19	L	M	2014	1	1
7	Gn	1.19	L	M	2014	0
3	Gn	3.12	M	L	2014	0
3	Gn	3.12	M	L	2014	1	1
3	Gn	3.12	M	L	2014	0
3	Gn	3.12	M	L	2014	1	1
3	Gn	3.12	M	L	2014	1	1
3	Gn	3.12	M	L	2014	0
3	Gn	3.12	M	L	2014	0
3	Gn	3.12	M	L	2014	1	1	1
3	Gn	5.23	M	L	2014	1	1
3	Gn	5.23	M	L	2014	1	1
3	Gn	5.23	M	L	2014	1	1	1
3	Gn	5.23	M	L	2014	0
3	Gn	5.23	M	L	2014	0
3	Gn	5.23	M	L	2014	0
3	Gn	5.23	M	L	2014	0
3	Gn	5.23	M	L	2014	0
5	Gn	3.16	M	L	2014	0
5	Gn	3.16	M	L	2014	1	1
5	Gn	3.16	M	L	2014	0
5	Gn	3.16	M	L	2014	0
5	Gn	3.16	M	L	2014	0
5	Gn	3.16	M	L	2014	1	1	1
5	Gn	3.16	M	L	2014	1	1
5	Gn	3.16	M	L	2014	0
6	Gn	3.12	M	L	2014	1	0
6	Gn	3.12	M	L	2014	1	0
6	Gn	3.12	M	L	2014	0
6	Gn	3.12	M	L	2014	1	1	1
6	Gn	3.12	M	L	2014	1	0
6	Gn	3.12	M	L	2014	0
6	Gn	3.12	M	L	2014	0
6	Gn	3.12	M	L	2014	0
6	Gn	3.16	M	L	2014	1	1
6	Gn	3.16	M	L	2014	1	0
6	Gn	3.16	M	L	2014	0
6	Gn	3.16	M	L	2014	1	1
6	Gn	3.16	M	L	2014	1	1
6	Gn	3.16	M	L	2014	1	1	1
6	Gn	3.16	M	L	2014	1	1
6	Gn	3.16	M	L	2014	1	1
6	Gn	5.23	M	L	2014	0
6	Gn	5.23	M	L	2014	1	1
6	Gn	5.23	M	L	2014	1	1	1
6	Gn	5.23	M	L	2014	0
6	Gn	5.23	M	L	2014	1	1
6	Gn	5.23	M	L	2014	1	1
6	Gn	5.23	M	L	2014	0
6	Gn	5.23	M	L	2014	0
11	Gn	11.9	M	M	2014	1	1	1
11	Gn	11.9	M	M	2014	0
11	Gn	11.9	M	M	2014	0
11	Gn	11.9	M	M	2014	0
11	Gn	11.9	M	M	2014	0
11	Gn	11.9	M	M	2014	0
11	Gn	11.9	M	M	2014	0
11	Gn	11.9	M	M	2014	0
11	Gn	11.9	M	M	2014	0
11	Gn	11.9	M	M	2014	1	1
11	Gn	11.9	M	M	2014	0
11	Gn	11.9	M	M	2014	1	1
11	Gn	11.9	M	M	2014	0
11	Gn	11.9	M	M	2014	0
11	Gn	11.9	M	M	2014	1	1	1
11	Gn	11.9	M	M	2014	0
12	Gn	12.4	M	M	2014	1	1	1
12	Gn	12.4	M	M	2014	1	1
12	Gn	12.4	M	M	2014	1	1
12	Gn	12.4	M	M	2014	1	1
12	Gn	12.4	M	M	2014	0
12	Gn	12.4	M	M	2014	1	1
12	Gn	12.4	M	M	2014	1	1
12	Gn	12.4	M	M	2014	1	1
13	Gn	11.9	M	M	2014	0
13	Gn	11.9	M	M	2014	0
13	Gn	11.9	M	M	2014	1	0
13	Gn	11.9	M	M	2014	0
13	Gn	11.9	M	M	2014	0
13	Gn	11.9	M	M	2014	1	1	1
13	Gn	11.9	M	M	2014	1	1
13	Gn	11.9	M	M	2014	0
14	Gn	11.9	M	M	2014	0
14	Gn	11.9	M	M	2014	0
14	Gn	11.9	M	M	2014	1	1	1
14	Gn	11.9	M	M	2014	0
14	Gn	11.9	M	M	2014	1	1
14	Gn	11.9	M	M	2014	1	0
14	Gn	11.9	M	M	2014	1	1
14	Gn	11.9	M	M	2014	1	1
14	Gn	12.4	M	M	2014	1	0
14	Gn	12.4	M	M	2014	1	0
14	Gn	12.4	M	M	2014	1	0
14	Gn	12.4	M	M	2014	0
14	Gn	12.4	M	M	2014	0
14	Gn	12.4	M	M	2014	0
14	Gn	12.4	M	M	2014	0
14	Gn	12.4	M	M	2014	0
9	Gn	16.9	L	L	2014	1	1	1
9	Gn	16.9	L	L	2014	1	1
9	Gn	16.9	L	L	2014	1	1
9	Gn	16.9	L	L	2014	1	1
9	Gn	16.9	L	L	2014	1	1
9	Gn	16.9	L	L	2014	1	1
9	Gn	16.9	L	L	2014	1	1
9	Gn	16.9	L	L	2014	1	1
9	Gn	16.14	L	L	2014	1	1	1
9	Gn	16.14	L	L	2014	1	1
9	Gn	16.14	L	L	2014	0
9	Gn	16.14	L	L	2014	1	1
9	Gn	16.14	L	L	2014	1	1
9	Gn	16.14	L	L	2014	1	1
9	Gn	16.14	L	L	2014	1	1
9	Gn	16.14	L	L	2014	1	1
9	Gn	16.14	L	L	2014	0
9	Gn	16.14	L	L	2014	1	1	1
9	Gn	16.14	L	L	2014	1	1
9	Gn	16.14	L	L	2014	1	1
9	Gn	16.14	L	L	2014	1	1
9	Gn	16.14	L	L	2014	1	1
9	Gn	16.14	L	L	2014	1	1
9	Gn	16.14	L	L	2014	1	1
10	Gn	9.13	L	L	2014	1	1
10	Gn	9.13	L	L	2014	1	1	1
10	Gn	9.13	L	L	2014	1	1
10	Gn	9.13	L	L	2014	1	1
10	Gn	9.13	L	L	2014	1	1
10	Gn	9.13	L	L	2014	1	0
10	Gn	9.13	L	L	2014	1	1
10	Gn	9.13	L	L	2014	1	0
15	Gn	9.13	L	L	2014	0
15	Gn	9.13	L	L	2014	1	1
15	Gn	9.13	L	L	2014	0
15	Gn	9.13	L	L	2014	1	1	1
15	Gn	9.13	L	L	2014	1	1
15	Gn	9.13	L	L	2014	1	1
15	Gn	9.13	L	L	2014	1	1
15	Gn	9.13	L	L	2014	1	1
15	Gn	16.9	L	L	2014	1	1
15	Gn	16.9	L	L	2014	1	1
15	Gn	16.9	L	L	2014	1	1
15	Gn	16.9	L	L	2014	1	1
15	Gn	16.9	L	L	2014	1	1
15	Gn	16.9	L	L	2014	1	1	1
15	Gn	16.9	L	L	2014	1	1
15	Gn	16.9	L	L	2014	1	1
9	Gn	9.13	L	L	2015	0
9	Gn	9.13	L	L	2015	0
9	Gn	7.18	L	L	2015	1	0
9	Gn	7.18	L	L	2015	1	0
9	Gn	4.2	L	L	2015	1	1	1
9	Gn	4.2	L	L	2015	1	0
9	Gn	12.4	L	L	2015	0
9	Gn	12.4	L	L	2015	1	0
9	Gn	12.4	L	L	2015	0
9	Gn	12.4	L	L	2015	1	0
9	Gn	12.4	L	L	2015	1	0
9	Gn	12.4	L	L	2015	0
9	Gn	12.4	L	L	2015	0
9	Gn	12.4	L	L	2015	0
9	Gn	12.4	L	L	2015	0
9	Gn	12.4	L	L	2015	0
10	Gn	16.9	L	L	2015	1	1	1
10	Gn	16.9	L	L	2015	0
10	Gn	16.9	L	L	2015	0
10	Gn	16.9	L	L	2015	1	1
10	Gn	16.9	L	L	2015	1	1
10	Gn	16.9	L	L	2015	0
10	Gn	16.9	L	L	2015	1	1
10	Gn	16.9	L	L	2015	1	1
10	Gn	7.18	L	L	2015	1	1
10	Gn	7.18	L	L	2015	1	1
10	Gn	7.18	L	L	2015	1	1	1
10	Gn	7.18	L	L	2015	1	1
10	Gn	7.18	L	L	2015	1	1
10	Gn	7.18	L	L	2015	1	1
10	Gn	7.18	L	L	2015	1	1
10	Gn	7.18	L	L	2015	1	1
15	Gn	4.2	L	L	2015	1	1
15	Gn	4.2	L	L	2015	1	1
15	Gn	4.2	L	L	2015	1	0
15	Gn	4.2	L	L	2015	1	0
15	Gn	4.2	L	L	2015	0
15	Gn	4.2	L	L	2015	0
15	Gn	4.2	L	L	2015	1	0
15	Gn	4.2	L	L	2015	1	1	1
16	Gn	9.13	L	L	2015	1	1
16	Gn	9.13	L	L	2015	1	1
16	Gn	9.13	L	L	2015	1	1	1
16	Gn	9.13	L	L	2015	0
16	Gn	9.13	L	L	2015	1	1
16	Gn	9.13	L	L	2015	1	1
16	Gn	9.13	L	L	2015	0
16	Gn	9.13	L	L	2015	1	1
3	Gn	1.19	L	M	2015	1	1	1
3	Gn	1.19	L	M	2015	1	0
3	Gn	1.19	L	M	2015	1	1
3	Gn	1.19	L	M	2015	0
3	Gn	1.19	L	M	2015	1	1
3	Gn	1.19	L	M	2015	1	1
3	Gn	1.19	L	M	2015	1	1
3	Gn	1.19	L	M	2015	0
4	Gn	1.27	L	M	2015	0
4	Gn	1.27	L	M	2015	0
4	Gn	1.27	L	M	2015	0
4	Gn	1.27	L	M	2015	0
4	Gn	1.27	L	M	2015	0
4	Gn	1.27	L	M	2015	0
4	Gn	1.27	L	M	2015	0
4	Gn	1.27	L	M	2015	0
4	Gn	9.13	L	M	2015	1	1
4	Gn	9.13	L	M	2015	1	1
4	Gn	1.19	L	M	2015	1	1	1
4	Gn	1.19	L	M	2015	1	0
4	Gn	4.17	L	M	2015	1	0
4	Gn	4.17	L	M	2015	1	0
4	Gn	14.2	L	M	2015	0
4	Gn	14.2	L	M	2015	0
4	Gn	14.2	L	M	2015	1	1
4	Gn	14.2	L	M	2015	1	1
4	Gn	14.2	L	M	2015	0
4	Gn	14.2	L	M	2015	1	1	1
4	Gn	14.2	L	M	2015	1	1
4	Gn	14.2	L	M	2015	0
4	Gn	14.2	L	M	2015	1	1
4	Gn	14.2	L	M	2015	0
5	Gn	9.13	L	M	2015	1	1
5	Gn	9.13	L	M	2015	1	1	1
5	Gn	9.13	L	M	2015	0
5	Gn	9.13	L	M	2015	0
5	Gn	9.13	L	M	2015	0
5	Gn	9.13	L	M	2015	1	1
5	Gn	9.13	L	M	2015	0
5	Gn	9.13	L	M	2015	0
6	Gn	4.17	L	M	2015	1	0
6	Gn	4.17	L	M	2015	0
6	Gn	4.17	L	M	2015	0
6	Gn	4.17	L	M	2015	0
6	Gn	4.17	L	M	2015	0
6	Gn	4.17	L	M	2015	0
6	Gn	4.17	L	M	2015	1	1	1
6	Gn	4.17	L	M	2015	1	1
1	Gn	3.12	M	L	2015	1	1
1	Gn	3.12	M	L	2015	1	0
1	Gn	3.12	M	L	2015	0
1	Gn	3.12	M	L	2015	0
1	Gn	3.12	M	L	2015	1	1	1
1	Gn	3.12	M	L	2015	0
1	Gn	3.12	M	L	2015	0
1	Gn	3.12	M	L	2015	0
2	Gn	5.23	M	L	2015	1	0
2	Gn	5.23	M	L	2015	0
2	Gn	5.23	M	L	2015	1	1	1
2	Gn	5.23	M	L	2015	1	1
2	Gn	5.23	M	L	2015	0
2	Gn	5.23	M	L	2015	0
2	Gn	5.23	M	L	2015	1	1
2	Gn	5.23	M	L	2015	1	1
7	Gn	3.12	M	L	2015	1	1	1
7	Gn	3.12	M	L	2015	0
7	Gn	3.12	M	L	2015	0
7	Gn	3.12	M	L	2015	0
7	Gn	3.12	M	L	2015	0
7	Gn	3.12	M	L	2015	1	1
7	Gn	3.12	M	L	2015	0
7	Gn	3.12	M	L	2015	1	0
7	Gn	12.24	M	L	2015	0
7	Gn	12.24	M	L	2015	0
7	Gn	12.24	M	L	2015	0
7	Gn	12.24	M	L	2015	0
7	Gn	12.24	M	L	2015	0
7	Gn	12.24	M	L	2015	0
7	Gn	12.24	M	L	2015	1	1	1
7	Gn	12.24	M	L	2015	1	1
8	Gn	12.24	M	L	2015	1	1	1
8	Gn	12.24	M	L	2015	0
8	Gn	12.24	M	L	2015	0
8	Gn	12.24	M	L	2015	0
8	Gn	12.24	M	L	2015	0
8	Gn	12.24	M	L	2015	0
8	Gn	12.24	M	L	2015	0
8	Gn	12.24	M	L	2015	0
8	Gn	7.5	M	L	2015	1	1
8	Gn	7.5	M	L	2015	1	1
8	Gn	7.5	M	L	2015	1	1	1
8	Gn	7.5	M	L	2015	1	1
8	Gn	3.12	M	L	2015	1	1
8	Gn	3.12	M	L	2015	0
8	Gn	3.12	M	L	2015	1	1
8	Gn	3.12	M	L	2015	1	1
11	Gn	7.18	M	M	2015	0
11	Gn	7.18	M	M	2015	1	1	1
11	Gn	7.18	M	M	2015	0
11	Gn	7.18	M	M	2015	0
11	Gn	7.18	M	M	2015	0
11	Gn	7.18	M	M	2015	0
11	Gn		M	M	2015	0
11	Gn		M	M	2015	0
11	Gn	7.18	M	M	2015	1	1	1
11	Gn	7.18	M	M	2015	1	0
11	Gn	7.18	M	M	2015	1	0
11	Gn	7.18	M	M	2015	1	0
11	Gn	7.18	M	M	2015	1	0
11	Gn	7.18	M	M	2015	0
11	Gn		M	M	2015	0
11	Gn		M	M	2015	0
12	Gn	7.18	M	M	2015	0
12	Gn	7.18	M	M	2015	0
12	Gn	7.18	M	M	2015	1	1	1
12	Gn	7.18	M	M	2015	1	0
12	Gn	7.18	M	M	2015	0
12	Gn	7.18	M	M	2015	1	0
12	Gn		M	M	2015	0
12	Gn		M	M	2015	0
14	Gn	7.25	M	M	2015	1	1	1
14	Gn	7.25	M	M	2015	0
14	Gn	7.25	M	M	2015	0
14	Gn	7.25	M	M	2015	1	1
14	Gn	7.18	M	M	2015	1	1
14	Gn	7.18	M	M	2015	1	1
14	Gn		M	M	2015	0
14	Gn		M	M	2015	0
14	Gn	7.18	M	M	2015	0
14	Gn	7.18	M	M	2015	0
14	Gn	7.18	M	M	2015	0
14	Gn	7.18	M	M	2015	1	1	1
14	Gn	7.18	M	M	2015	0
14	Gn	7.18	M	M	2015	0
14	Gn		M	M	2015	0
14	Gn		M	M	2015	0

## Sheet: ptr_rep_o
PLOT	GEN	CODE	E.	L.	YEAR	REP_RAT
1	G0	P	M	L	2013
1	G0	P	M	L	2013
1	G0	P	M	L	2013	0
1	G0	P	M	L	2013
1	G0	P	M	L	2013	0
1	G0	P	M	L	2013	1
1	G0	P	M	L	2013	0
2	G0	P	M	L	2013	1
2	G0	P	M	L	2013	1
2	G0	P	M	L	2013	0
2	G0	P	M	L	2013	0
2	G0	P	M	L	2013	0
2	G0	P	M	L	2013	0
2	G0	P	M	L	2013	0
3	G0	P	L	M	2013	0
3	G0	P	L	M	2013	1
3	G0	P	L	M	2013	1
3	G0	P	L	M	2013	1
3	G0	P	L	M	2013	1
3	G0	P	L	M	2013	0
3	G0	P	L	M	2013	0
4	G0	P	L	M	2013	0
4	G0	P	L	M	2013
4	G0	P	L	M	2013
4	G0	P	L	M	2013	0
4	G0	P	L	M	2013	0
4	G0	P	L	M	2013	0
4	G0	P	L	M	2013
5	G0	P	L	M	2013	0
5	G0	P	L	M	2013	0
5	G0	P	L	M	2013	1
5	G0	P	L	M	2013	1
5	G0	P	L	M	2013	1
5	G0	P	L	M	2013
5	G0	P	L	M	2013	0
6	G0	P	L	M	2013	0
6	G0	P	L	M	2013	0
6	G0	P	L	M	2013	0
6	G0	P	L	M	2013	1
6	G0	P	L	M	2013	0
6	G0	P	L	M	2013	0
6	G0	P	L	M	2013	1
7	G0	P	M	L	2013	1
7	G0	P	M	L	2013	1
7	G0	P	M	L	2013	0
7	G0	P	M	L	2013	1
7	G0	P	M	L	2013	0
7	G0	P	M	L	2013	0
7	G0	P	M	L	2013	0
8	G0	P	M	L	2013
8	G0	P	M	L	2013
8	G0	P	M	L	2013	0
8	G0	P	M	L	2013	0
8	G0	P	M	L	2013	1
8	G0	P	M	L	2013	0
8	G0	P	M	L	2013	0
9	G0	P	L	L	2013	0
9	G0	P	L	L	2013	0
9	G0	P	L	L	2013	1
9	G0	P	L	L	2013	1
9	G0	P	L	L	2013
9	G0	P	L	L	2013	0
9	G0	P	L	L	2013	1
10	G0	P	L	L	2013	0
10	G0	P	L	L	2013	0
10	G0	P	L	L	2013	1
10	G0	P	L	L	2013	0
10	G0	P	L	L	2013	0
10	G0	P	L	L	2013	0
10	G0	P	L	L	2013	0
11	G0	P	M	M	2013
11	G0	P	M	M	2013
11	G0	P	M	M	2013
11	G0	P	M	M	2013
11	G0	P	M	M	2013
11	G0	P	M	M	2013
11	G0	P	M	M	2013	0
12	G0	P	M	M	2013	0
12	G0	P	M	M	2013	0
12	G0	P	M	M	2013
12	G0	P	M	M	2013
12	G0	P	M	M	2013	1
12	G0	P	M	M	2013
12	G0	P	M	M	2013	0
13	G0	P	M	M	2013
13	G0	P	M	M	2013
13	G0	P	M	M	2013	0
13	G0	P	M	M	2013
13	G0	P	M	M	2013	1
13	G0	P	M	M	2013
13	G0	P	M	M	2013	0
14	G0	P	M	M	2013	0
14	G0	P	M	M	2013	0
14	G0	P	M	M	2013	0
14	G0	P	M	M	2013	0
14	G0	P	M	M	2013	0
14	G0	P	M	M	2013
14	G0	P	M	M	2013
15	G0	P	L	L	2013	1
15	G0	P	L	L	2013	0
15	G0	P	L	L	2013
15	G0	P	L	L	2013	1
15	G0	P	L	L	2013	1
15	G0	P	L	L	2013	0
15	G0	P	L	L	2013	1
16	G0	P	L	L	2013	1
16	G0	P	L	L	2013
16	G0	P	L	L	2013
16	G0	P	L	L	2013	1
16	G0	P	L	L	2013	1
16	G0	P	L	L	2013
16	G0	P	L	L	2013	1
1	G0	P	L	M	2014	1
1	G0	P	L	M	2014	0
1	G0	P	L	M	2014	0
1	G0	P	L	M	2014	1
1	G0	P	L	M	2014	1
1	G0	P	L	M	2014	1
1	G0	P	L	M	2014	1
2	G0	P	L	M	2014	0
2	G0	P	L	M	2014	0
2	G0	P	L	M	2014	0
2	G0	P	L	M	2014	0
2	G0	P	L	M	2014	0
2	G0	P	L	M	2014	0
2	G0	P	L	M	2014	0
3	G0	P	M	L	2014	0
3	G0	P	M	L	2014	1
3	G0	P	M	L	2014	0
3	G0	P	M	L	2014	1
3	G0	P	M	L	2014	0
3	G0	P	M	L	2014	0
3	G0	P	M	L	2014	1
4	G0	P	M	L	2014	0
4	G0	P	M	L	2014	0
4	G0	P	M	L	2014	0
4	G0	P	M	L	2014	0
4	G0	P	M	L	2014	0
4	G0	P	M	L	2014	0
4	G0	P	M	L	2014	0
5	G0	P	M	L	2014	1
5	G0	P	M	L	2014	1
5	G0	P	M	L	2014
5	G0	P	M	L	2014	1
5	G0	P	M	L	2014	0
5	G0	P	M	L	2014
5	G0	P	M	L	2014
6	G0	P	M	L	2014	0
6	G0	P	M	L	2014	0
6	G0	P	M	L	2014	0
6	G0	P	M	L	2014	0
6	G0	P	M	L	2014
6	G0	P	M	L	2014
6	G0	P	M	L	2014
7	G0	P	L	M	2014	0
7	G0	P	L	M	2014	0
7	G0	P	L	M	2014	0
7	G0	P	L	M	2014	0
7	G0	P	L	M	2014	0
7	G0	P	L	M	2014	1
7	G0	P	L	M	2014	0
8	G0	P	L	M	2014	0
8	G0	P	L	M	2014
8	G0	P	L	M	2014	1
8	G0	P	L	M	2014	1
8	G0	P	L	M	2014
8	G0	P	L	M	2014	0
8	G0	P	L	M	2014
9	G0	P	L	L	2014	0
9	G0	P	L	L	2014	1
9	G0	P	L	L	2014	1
9	G0	P	L	L	2014	1
9	G0	P	L	L	2014	1
9	G0	P	L	L	2014	1
9	G0	P	L	L	2014	0
10	G0	P	L	L	2014	0
10	G0	P	L	L	2014	0
10	G0	P	L	L	2014	0
10	G0	P	L	L	2014
10	G0	P	L	L	2014	0
10	G0	P	L	L	2014	0
10	G0	P	L	L	2014	0
11	G0	P	M	M	2014	0
11	G0	P	M	M	2014	0
11	G0	P	M	M	2014	0
11	G0	P	M	M	2014	0
11	G0	P	M	M	2014
11	G0	P	M	M	2014	1
11	G0	P	M	M	2014	0
12	G0	P	M	M	2014
12	G0	P	M	M	2014
12	G0	P	M	M	2014	0
12	G0	P	M	M	2014	1
12	G0	P	M	M	2014	0
12	G0	P	M	M	2014	0
12	G0	P	M	M	2014	0
13	G0	P	M	M	2014	0
13	G0	P	M	M	2014	1
13	G0	P	M	M	2014
13	G0	P	M	M	2014	0
13	G0	P	M	M	2014	0
13	G0	P	M	M	2014	0
13	G0	P	M	M	2014
14	G0	P	M	M	2014	0
14	G0	P	M	M	2014	0
14	G0	P	M	M	2014	0
14	G0	P	M	M	2014	0
14	G0	P	M	M	2014	0
14	G0	P	M	M	2014	0
14	G0	P	M	M	2014
15	G0	P	L	L	2014	1
15	G0	P	L	L	2014	1
15	G0	P	L	L	2014	1
15	G0	P	L	L	2014	1
15	G0	P	L	L	2014	1
15	G0	P	L	L	2014	1
15	G0	P	L	L	2014	0
16	G0	P	L	L	2014	1
16	G0	P	L	L	2014	1
16	G0	P	L	L	2014	1
16	G0	P	L	L	2014	1
16	G0	P	L	L	2014	0
16	G0	P	L	L	2014	1
16	G0	P	L	L	2014	1
1	G0	P	M	L	2015	0
1	G0	P	M	L	2015	1
1	G0	P	M	L	2015	1
1	G0	P	M	L	2015	1
1	G0	P	M	L	2015	1
1	G0	P	M	L	2015	1
1	G0	P	M	L	2015	1
2	G0	P	M	L	2015	0
2	G0	P	M	L	2015	0
2	G0	P	M	L	2015	1
2	G0	P	M	L	2015	0
2	G0	P	M	L	2015	0
2	G0	P	M	L	2015	1
2	G0	P	M	L	2015	0
3	G0	P	L	M	2015	1
3	G0	P	L	M	2015
3	G0	P	L	M	2015	1
3	G0	P	L	M	2015
3	G0	P	L	M	2015	1
3	G0	P	L	M	2015	1
3	G0	P	L	M	2015	1
4	G0	P	L	M	2015	1
4	G0	P	L	M	2015	0
4	G0	P	L	M	2015	1
4	G0	P	L	M	2015	0
4	G0	P	L	M	2015	1
4	G0	P	L	M	2015	0
4	G0	P	L	M	2015	0
5	G0	P	L	M	2015	0
5	G0	P	L	M	2015	1
5	G0	P	L	M	2015	1
5	G0	P	L	M	2015	0
5	G0	P	L	M	2015	1
5	G0	P	L	M	2015
5	G0	P	L	M	2015	1
6	G0	P	L	M	2015	0
6	G0	P	L	M	2015
6	G0	P	L	M	2015	1
6	G0	P	L	M	2015	1
6	G0	P	L	M	2015	0
6	G0	P	L	M	2015	1
6	G0	P	L	M	2015	1
7	G0	P	M	L	2015	1
7	G0	P	M	L	2015	0
7	G0	P	M	L	2015	0
7	G0	P	M	L	2015	1
7	G0	P	M	L	2015	1
7	G0	P	M	L	2015
7	G0	P	M	L	2015	0
8	G0	P	M	L	2015	1
8	G0	P	M	L	2015	0
8	G0	P	M	L	2015	0
8	G0	P	M	L	2015	0
8	G0	P	M	L	2015	1
8	G0	P	M	L	2015	0
8	G0	P	M	L	2015	0
9	G0	P	L	L	2015	1
9	G0	P	L	L	2015	0
9	G0	P	L	L	2015	0
9	G0	P	L	L	2015	1
9	G0	P	L	L	2015	1
9	G0	P	L	L	2015	1
9	G0	P	L	L	2015	1
10	G0	P	L	L	2015	0
10	G0	P	L	L	2015	1
10	G0	P	L	L	2015	0
10	G0	P	L	L	2015	1
10	G0	P	L	L	2015	0
10	G0	P	L	L	2015	1
10	G0	P	L	L	2015	1
11	G0	P	M	M	2015	0
11	G0	P	M	M	2015	0
11	G0	P	M	M	2015
11	G0	P	M	M	2015	1
11	G0	P	M	M	2015	0
11	G0	P	M	M	2015	1
11	G0	P	M	M	2015	0
12	G0	P	M	M	2015	1
12	G0	P	M	M	2015	0
12	G0	P	M	M	2015	1
12	G0	P	M	M	2015	0
12	G0	P	M	M	2015
12	G0	P	M	M	2015	0
12	G0	P	M	M	2015	0
13	G0	P	M	M	2015
13	G0	P	M	M	2015	1
13	G0	P	M	M	2015	0
13	G0	P	M	M	2015	0
13	G0	P	M	M	2015
13	G0	P	M	M	2015	0
13	G0	P	M	M	2015	0
14	G0	P	M	M	2015	1
14	G0	P	M	M	2015	1
14	G0	P	M	M	2015	0
14	G0	P	M	M	2015	1
14	G0	P	M	M	2015
14	G0	P	M	M	2015	1
14	G0	P	M	M	2015
15	G0	P	L	L	2015	0
15	G0	P	L	L	2015	1
15	G0	P	L	L	2015	0
15	G0	P	L	L	2015
15	G0	P	L	L	2015	1
15	G0	P	L	L	2015	0
15	G0	P	L	L	2015	1
16	G0	P	L	L	2015	1
16	G0	P	L	L	2015	1
16	G0	P	L	L	2015	1
16	G0	P	L	L	2015	1
16	G0	P	L	L	2015	1
16	G0	P	L	L	2015	0
16	G0	P	L	L	2015	1
1	Gn	5.19	M	L	2013
1	Gn	3.16	M	L	2013	1
1	Gn	4.14	M	L	2013	0
1	Gn	3.12	M	L	2013
1	Gn	5.23	M	L	2013	0
2	Gn	3.16	M	L	2013
2	Gn	4.2	M	L	2013	1
2	Gn	4.2	M	L	2013	0
2	Gn	4.17	M	L	2013
2	Gn	3.16	M	L	2013	1
3	Gn	1.19	L	M	2013
3	Gn	7.18	L	M	2013
3	Gn	7.18	L	M	2013	1
3	Gn	7.25	L	M	2013	0
3	Gn	7.25	L	M	2013
4	Gn	7.25	L	M	2013
4	Gn	1.27	L	M	2013	1
4	Gn	7.5	L	M	2013
4	Gn	7.25	L	M	2013	0
4	Gn	1.27	L	M	2013	1
5	Gn	7.18	L	M	2013
5	Gn	7.5	L	M	2013
5	Gn	8.5	L	M	2013
5	Gn	7.5	L	M	2013
5	Gn	7.18	L	M	2013	1
6	Gn	8.20	L	M	2013
6	Gn	7.18	L	M	2013	1
6	Gn	7.5	L	M	2013
6	Gn	1.19	L	M	2013	0
6	Gn	1.19	L	M	2013	1
6	Gn	7.25	L	M	2013	0
7	Gn	4.2	M	L	2013
7	Gn	3.12	M	L	2013	1
7	Gn	3.16	M	L	2013	1
7	Gn	3.12	M	L	2013	1
7	Gn	4.2	M	L	2013	0
7	Gn	5.23	M	L	2013
8	Gn	5.23	M	L	2013	1
8	Gn	3.12	M	L	2013	1
8	Gn	3.16	M	L	2013	1
8	Gn	5.23	M	L	2013	1
8	Gn	3.12	M	L	2013	1
9	Gn	15.7	L	L	2013
9	Gn	16.9	L	L	2013
9	Gn	16.14	L	L	2013
9	Gn	10.21	L	L	2013
9	Gn	15.7	L	L	2013
10	Gn	16.14	L	L	2013
10	Gn	15.7	L	L	2013
10	Gn	9.9	L	L	2013
10	Gn	9.9	L	L	2013
10	Gn	16.14	L	L	2013
10	Gn	16.9	L	L	2013	1
11	Gn	12.4	M	M	2013
11	Gn	12.24	M	M	2013	0
11	Gn	14.11	M	M	2013
11	Gn	12.4	M	M	2013
11	Gn	12.4	M	M	2013	0
12	Gn	11.21	M	M	2013	0
12	Gn	11.9	M	M	2013	1
12	Gn	14.6	M	M	2013
12	Gn	14.11	M	M	2013
12	Gn	14.2	M	M	2013
12	Gn	11.9	M	M	2013	1
13	Gn	12.24	M	M	2013
13	Gn	12.4	M	M	2013	1
13	Gn	14.17	M	M	2013
13	Gn	12.4	M	M	2013	1
13	Gn	12.24	M	M	2013
14	Gn	11.9	M	M	2013
14	Gn	12.24	M	M	2013	0
14	Gn	11.21	M	M	2013	0
14	Gn	11.9	M	M	2013	0
14	Gn	11.9	M	M	2013
15	Gn	9.1	L	L	2013
15	Gn	9.9	L	L	2013
15	Gn	16.14	L	L	2013	1
15	Gn	16.14	L	L	2013	1
15	Gn	9.13	L	L	2013
16	Gn	9.9	L	L	2013
16	Gn	15.7	L	L	2013
16	Gn	9.13	L	L	2013
16	Gn	9.13	L	L	2013	1
16	Gn	9.9	L	L	2013
1	Gn	7.18	L	M	2014	1
2	Gn	7.18	L	M	2014	1
2	Gn	1.27	L	M	2014	1
2	Gn	1.27	L	M	2014	1
2	Gn	1.19	L	M	2014	1
3	Gn	3.12	M	L	2014	1
3	Gn	5.23	M	L	2014	1
5	Gn	3.16	M	L	2014	1
6	Gn	3.12	M	L	2014	0
6	Gn	3.16	M	L	2014	1
6	Gn	5.23	M	L	2014	0
7	Gn	1.19	L	M	2014	1
9	Gn	16.9	L	L	2014	1
9	Gn	16.14	L	L	2014	1
9	Gn	16.14	L	L	2014	1
10	Gn	9.13	L	L	2014	1
11	Gn	11.9	M	M	2014	0
11	Gn	11.9	M	M	2014	0
12	Gn	12.4	M	M	2014	0
13	Gn	11.9	M	M	2014	0
14	Gn	11.9	M	M	2014	0
14	Gn	12.4	M	M	2014
15	Gn	9.13	L	L	2014	1
15	Gn	16.9	L	L	2014	0
1	Gn	3.12	M	L	2015	1
2	Gn	5.23	M	L	2015	1
3	Gn	1.19	L	M	2015	1
4	Gn	1.27	L	M	2015
4	Gn	1.19	L	M	2015	0
4	Gn	14.2	L	M	2015	1
5	Gn	9.13	L	M	2015	1
6	Gn	4.17	L	M	2015	1
7	Gn	3.12	M	L	2015	0
7	Gn	12.24	M	L	2015	1
8	Gn	12.24	M	L	2015	0
8	Gn	7.5	M	L	2015	1
9	Gn	4.2	L	L	2015	1
9	Gn	12.4	L	L	2015
10	Gn	16.9	L	L	2015	0
10	Gn	7.18	L	L	2015	1
11	Gn	7.18	M	M	2015	1
11	Gn	7.18	M	M	2015	1
12	Gn	7.18	M	M	2015	1
14	Gn	7.25	M	M	2015	1
14	Gn	7.18	M	M	2015	1
15	Gn	4.2	L	L	2015	1
16	Gn	9.13	L	L	2015	1

## Sheet: ptr_p
POLT	GEN	CODe	E.	L.	YEAR	Emerg	E_SURV	L_SURV	REP_RAT
1	G0	P	M	L	2013	0
1	G0	P	M	L	2013	1	0
1	G0	P	M	L	2013	0
1	G0	P	M	L	2013	0
1	G0	P	M	L	2013	0
1	G0	P	M	L	2013	0
1	G0	P	M	L	2013	1	1	0
1	G0	P	M	L	2013	0
1	G0	P	M	L	2013	0
1	G0	P	M	L	2013	1	1	1	1
1	G0	P	M	L	2013	1	0
1	G0	P	M	L	2013	0
1	G0	P	M	L	2013	0
1	G0	P	M	L	2013	1	1	1	1
1	G0	P	M	L	2013	1	0
1	G0	P	M	L	2013	1	1	1	0
1	G0	P	M	L	2013	1	0
1	G0	P	M	L	2013	1	0
1	G0	P	M	L	2013	1	1	1	1
1	G0	P	M	L	2013	0
1	G0	P	M	L	2013	1	1
1	G0	P	M	L	2013	1	0
1	G0	P	M	L	2013	1	0
1	G0	P	M	L	2013	1	0
1	G0	P	M	L	2013	0
1	G0	P	M	L	2013	0
1	G0	P	M	L	2013	0
1	G0	P	M	L	2013	1	1	1	1
1	G0	P	M	L	2013	1	0
1	G0	P	M	L	2013	0
1	G0	P	M	L	2013	0
1	G0	P	M	L	2013	0
1	G0	P	M	L	2013	0
1	G0	P	M	L	2013	0
1	G0	P	M	L	2013	0
1	G0	P	M	L	2013	0
1	G0	P	M	L	2013	0
1	G0	P	M	L	2013	0
1	G0	P	M	L	2013	0
1	G0	P	M	L	2013	1	0
1	G0	P	M	L	2013	0
1	G0	P	M	L	2013	0
1	G0	P	M	L	2013	0
1	G0	P	M	L	2013	0
1	G0	P	M	L	2013	0
1	G0	P	M	L	2013	0
1	G0	P	M	L	2013	0
1	G0	P	M	L	2013	0
1	G0	P	M	L	2013	0
1	G0	P	M	L	2013	0
1	G0	P	M	L	2013	0
1	G0	P	M	L	2013	0
1	G0	P	M	L	2013	0
1	G0	P	M	L	2013	1	1	1	0
1	G0	P	M	L	2013	0
1	G0	P	M	L	2013	0
1	G0	P	M	L	2013	0
1	G0	P	M	L	2013	0
1	G0	P	M	L	2013	0
1	G0	P	M	L	2013	1	1	1	1
1	G0	P	M	L	2013	0
1	G0	P	M	L	2013	0
1	G0	P	M	L	2013	0
2	G0	P	M	L	2013	0
2	G0	P	M	L	2013	0
2	G0	P	M	L	2013	0
2	G0	P	M	L	2013	0
2	G0	P	M	L	2013	0
2	G0	P	M	L	2013	0
2	G0	P	M	L	2013	0
2	G0	P	M	L	2013	0
2	G0	P	M	L	2013	0
2	G0	P	M	L	2013	1	0
2	G0	P	M	L	2013	1	0
2	G0	P	M	L	2013	0
2	G0	P	M	L	2013	0
2	G0	P	M	L	2013	1	1	0
2	G0	P	M	L	2013	1	0
2	G0	P	M	L	2013	0
2	G0	P	M	L	2013	0
2	G0	P	M	L	2013	0
2	G0	P	M	L	2013	1	0
2	G0	P	M	L	2013	0
2	G0	P	M	L	2013	0
2	G0	P	M	L	2013	0
2	G0	P	M	L	2013	0
2	G0	P	M	L	2013	0
2	G0	P	M	L	2013	0
2	G0	P	M	L	2013	0
2	G0	P	M	L	2013	0
2	G0	P	M	L	2013	0
2	G0	P	M	L	2013	0
2	G0	P	M	L	2013	0
2	G0	P	M	L	2013	0
2	G0	P	M	L	2013	1	0
2	G0	P	M	L	2013	0
2	G0	P	M	L	2013	1	1	0
2	G0	P	M	L	2013	0
2	G0	P	M	L	2013	0
2	G0	P	M	L	2013	0
2	G0	P	M	L	2013	0
2	G0	P	M	L	2013	0
2	G0	P	M	L	2013	0
2	G0	P	M	L	2013	0
2	G0	P	M	L	2013	0
2	G0	P	M	L	2013	0
2	G0	P	M	L	2013	1	0
2	G0	P	M	L	2013	0
2	G0	P	M	L	2013	0
2	G0	P	M	L	2013	0
2	G0	P	M	L	2013	0
2	G0	P	M	L	2013	0
2	G0	P	M	L	2013	0
2	G0	P	M	L	2013	0
2	G0	P	M	L	2013	0
2	G0	P	M	L	2013	0
2	G0	P	M	L	2013	1	1	0
2	G0	P	M	L	2013	0
2	G0	P	M	L	2013	0
2	G0	P	M	L	2013	0
2	G0	P	M	L	2013	0
2	G0	P	M	L	2013	0
2	G0	P	M	L	2013	0
2	G0	P	M	L	2013	1	1	1	1
2	G0	P	M	L	2013	0
2	G0	P	M	L	2013	0
3	G0	P	L	M	2013	1	0
3	G0	P	L	M	2013	1	0
3	G0	P	L	M	2013	1	1	1	1
3	G0	P	L	M	2013	1	1	1	1
3	G0	P	L	M	2013	0
3	G0	P	L	M	2013	1	0
3	G0	P	L	M	2013	0
3	G0	P	L	M	2013	1	1	1	1
3	G0	P	L	M	2013	1	0
3	G0	P	L	M	2013	1	0
3	G0	P	L	M	2013	0
3	G0	P	L	M	2013	0
3	G0	P	L	M	2013	1	0
3	G0	P	L	M	2013	1	1
3	G0	P	L	M	2013	1	1	1	1
3	G0	P	L	M	2013	0
3	G0	P	L	M	2013	1	1	1	1
3	G0	P	L	M	2013	0
3	G0	P	L	M	2013	0
3	G0	P	L	M	2013	0
3	G0	P	L	M	2013	1	1	1	0
3	G0	P	L	M	2013	1	1	1	1
3	G0	P	L	M	2013	1	0
3	G0	P	L	M	2013	1	1
3	G0	P	L	M	2013	0
3	G0	P	L	M	2013	1	1	1	1
3	G0	P	L	M	2013	1	1
3	G0	P	L	M	2013	1	0
3	G0	P	L	M	2013	1	0
3	G0	P	L	M	2013	1	0
3	G0	P	L	M	2013	1	1	1	1
3	G0	P	L	M	2013	1	1
3	G0	P	L	M	2013	1	0
3	G0	P	L	M	2013	0
3	G0	P	L	M	2013	0
3	G0	P	L	M	2013	0
3	G0	P	L	M	2013	0
3	G0	P	L	M	2013	0
3	G0	P	L	M	2013	0
3	G0	P	L	M	2013	0
3	G0	P	L	M	2013	0
3	G0	P	L	M	2013	0
3	G0	P	L	M	2013	1	1	1	1
3	G0	P	L	M	2013	0
3	G0	P	L	M	2013	1	0
3	G0	P	L	M	2013	1	1	1	1
3	G0	P	L	M	2013	0
3	G0	P	L	M	2013	0
3	G0	P	L	M	2013	0
3	G0	P	L	M	2013	0
3	G0	P	L	M	2013	0
3	G0	P	L	M	2013	1	1	1	1
3	G0	P	L	M	2013	0
3	G0	P	L	M	2013	1	0
3	G0	P	L	M	2013	1	0
3	G0	P	L	M	2013	0
3	G0	P	L	M	2013	1	0
3	G0	P	L	M	2013	1	0
3	G0	P	L	M	2013	1	0
3	G0	P	L	M	2013	0
3	G0	P	L	M	2013	1	0
3	G0	P	L	M	2013	1	0
3	G0	P	L	M	2013	0
4	G0	P	L	M	2013	0
4	G0	P	L	M	2013	0
4	G0	P	L	M	2013	1	0
4	G0	P	L	M	2013	0
4	G0	P	L	M	2013	0
4	G0	P	L	M	2013	0
4	G0	P	L	M	2013	1	0
4	G0	P	L	M	2013	0
4	G0	P	L	M	2013	1	0
4	G0	P	L	M	2013	0
4	G0	P	L	M	2013	0
4	G0	P	L	M	2013	1	0
4	G0	P	L	M	2013	0
4	G0	P	L	M	2013	1	0
4	G0	P	L	M	2013	0
4	G0	P	L	M	2013	1	1	1	1
4	G0	P	L	M	2013	0
4	G0	P	L	M	2013	0
4	G0	P	L	M	2013	0
4	G0	P	L	M	2013	1	0
4	G0	P	L	M	2013	0
4	G0	P	L	M	2013	0
4	G0	P	L	M	2013	0
4	G0	P	L	M	2013	1	0
4	G0	P	L	M	2013	0
4	G0	P	L	M	2013	0
4	G0	P	L	M	2013	1	0
4	G0	P	L	M	2013	0
4	G0	P	L	M	2013	1	1	1	1
4	G0	P	L	M	2013	1	0
4	G0	P	L	M	2013	1	0
4	G0	P	L	M	2013	1	0
4	G0	P	L	M	2013	0
4	G0	P	L	M	2013	0
4	G0	P	L	M	2013	1	0
4	G0	P	L	M	2013	0
4	G0	P	L	M	2013	1	0
4	G0	P	L	M	2013	0
4	G0	P	L	M	2013	0
4	G0	P	L	M	2013	1	0
4	G0	P	L	M	2013	1	0
4	G0	P	L	M	2013	0
4	G0	P	L	M	2013	0
4	G0	P	L	M	2013	0
4	G0	P	L	M	2013	0
4	G0	P	L	M	2013	0
4	G0	P	L	M	2013	0
4	G0	P	L	M	2013	0
4	G0	P	L	M	2013	0
4	G0	P	L	M	2013	1	0
4	G0	P	L	M	2013	0
4	G0	P	L	M	2013	0
4	G0	P	L	M	2013	0
4	G0	P	L	M	2013	0
4	G0	P	L	M	2013	0
4	G0	P	L	M	2013	0
4	G0	P	L	M	2013	0
4	G0	P	L	M	2013	0
4	G0	P	L	M	2013	0
4	G0	P	L	M	2013	0
4	G0	P	L	M	2013	0
4	G0	P	L	M	2013	0
4	G0	P	L	M	2013	0
5	G0	P	L	M	2013	0
5	G0	P	L	M	2013	0
5	G0	P	L	M	2013	0
5	G0	P	L	M	2013	1	1	0
5	G0	P	L	M	2013	0
5	G0	P	L	M	2013	1	1
5	G0	P	L	M	2013	1	0
5	G0	P	L	M	2013	0
5	G0	P	L	M	2013	1	0
5	G0	P	L	M	2013	0
5	G0	P	L	M	2013	0
5	G0	P	L	M	2013	1	0
5	G0	P	L	M	2013	0
5	G0	P	L	M	2013	0
5	G0	P	L	M	2013	0
5	G0	P	L	M	2013	0
5	G0	P	L	M	2013	1	1	1	1
5	G0	P	L	M	2013	1	0
5	G0	P	L	M	2013	0
5	G0	P	L	M	2013	0
5	G0	P	L	M	2013	1	1	1	1
5	G0	P	L	M	2013	1	0
5	G0	P	L	M	2013	1	0
5	G0	P	L	M	2013	0
5	G0	P	L	M	2013	0
5	G0	P	L	M	2013	0
5	G0	P	L	M	2013	0
5	G0	P	L	M	2013	0
5	G0	P	L	M	2013	0
5	G0	P	L	M	2013	0
5	G0	P	L	M	2013	0
5	G0	P	L	M	2013	0
5	G0	P	L	M	2013	1	1	1	1
5	G0	P	L	M	2013	0
5	G0	P	L	M	2013	0
5	G0	P	L	M	2013	0
5	G0	P	L	M	2013	0
5	G0	P	L	M	2013	0
5	G0	P	L	M	2013	0
5	G0	P	L	M	2013	0
5	G0	P	L	M	2013	0
5	G0	P	L	M	2013	0
5	G0	P	L	M	2013	0
5	G0	P	L	M	2013	0
5	G0	P	L	M	2013	0
5	G0	P	L	M	2013	0
5	G0	P	L	M	2013	0
5	G0	P	L	M	2013	0
5	G0	P	L	M	2013	1	0
5	G0	P	L	M	2013	0
5	G0	P	L	M	2013	0
5	G0	P	L	M	2013	0
5	G0	P	L	M	2013	0
5	G0	P	L	M	2013	0
5	G0	P	L	M	2013	0
5	G0	P	L	M	2013	0
5	G0	P	L	M	2013	0
5	G0	P	L	M	2013	0
5	G0	P	L	M	2013	0
5	G0	P	L	M	2013	0
5	G0	P	L	M	2013	0
5	G0	P	L	M	2013	0
5	G0	P	L	M	2013	0
6	G0	P	L	M	2013	0
6	G0	P	L	M	2013	0
6	G0	P	L	M	2013	0
6	G0	P	L	M	2013	0
6	G0	P	L	M	2013	0
6	G0	P	L	M	2013	0
6	G0	P	L	M	2013	0
6	G0	P	L	M	2013	0
6	G0	P	L	M	2013	0
6	G0	P	L	M	2013	1	0
6	G0	P	L	M	2013	1	0
6	G0	P	L	M	2013	1	0
6	G0	P	L	M	2013	0
6	G0	P	L	M	2013	1	1	1	0
6	G0	P	L	M	2013	1	0
6	G0	P	L	M	2013	1	0
6	G0	P	L	M	2013	0
6	G0	P	L	M	2013	1	1	1	1
6	G0	P	L	M	2013	1	0
6	G0	P	L	M	2013	0
6	G0	P	L	M	2013	1	0
6	G0	P	L	M	2013	0
6	G0	P	L	M	2013	0
6	G0	P	L	M	2013	0
6	G0	P	L	M	2013	1	0
6	G0	P	L	M	2013	1	0
6	G0	P	L	M	2013	0
6	G0	P	L	M	2013	1	0
6	G0	P	L	M	2013	0
6	G0	P	L	M	2013	0
6	G0	P	L	M	2013	1	1	1	1
6	G0	P	L	M	2013	0
6	G0	P	L	M	2013	0
6	G0	P	L	M	2013	1	0
6	G0	P	L	M	2013	0
6	G0	P	L	M	2013	0
6	G0	P	L	M	2013	0
6	G0	P	L	M	2013	0
6	G0	P	L	M	2013	0
6	G0	P	L	M	2013	0
6	G0	P	L	M	2013	0
6	G0	P	L	M	2013	1	0
6	G0	P	L	M	2013	0
6	G0	P	L	M	2013	1	0
6	G0	P	L	M	2013	0
6	G0	P	L	M	2013	0
6	G0	P	L	M	2013	0
6	G0	P	L	M	2013	0
6	G0	P	L	M	2013	1	0
6	G0	P	L	M	2013	0
6	G0	P	L	M	2013	1	0
6	G0	P	L	M	2013	0
6	G0	P	L	M	2013	0
6	G0	P	L	M	2013	0
6	G0	P	L	M	2013	1	0
6	G0	P	L	M	2013	0
6	G0	P	L	M	2013	0
6	G0	P	L	M	2013	1	0
6	G0	P	L	M	2013	0
6	G0	P	L	M	2013	0
6	G0	P	L	M	2013	1	0
6	G0	P	L	M	2013	1	0
6	G0	P	L	M	2013	1	0
7	G0	P	M	L	2013	1	1
7	G0	P	M	L	2013	0
7	G0	P	M	L	2013	1	1	1	1
7	G0	P	M	L	2013	0
7	G0	P	M	L	2013	0
7	G0	P	M	L	2013	0
7	G0	P	M	L	2013	0
7	G0	P	M	L	2013	1	1	1	1
7	G0	P	M	L	2013	0
7	G0	P	M	L	2013	1	0
7	G0	P	M	L	2013	1	0
7	G0	P	M	L	2013	1	0
7	G0	P	M	L	2013	1	0
7	G0	P	M	L	2013	0
7	G0	P	M	L	2013	1	0
7	G0	P	M	L	2013	1	0
7	G0	P	M	L	2013	0
7	G0	P	M	L	2013	1	1	1	1
7	G0	P	M	L	2013	1	1	0
7	G0	P	M	L	2013	0
7	G0	P	M	L	2013	0
7	G0	P	M	L	2013	0
7	G0	P	M	L	2013	1	1	1	1
7	G0	P	M	L	2013	1	0
7	G0	P	M	L	2013	0
7	G0	P	M	L	2013	1	1
7	G0	P	M	L	2013	1	1	1	1
7	G0	P	M	L	2013	0
7	G0	P	M	L	2013	1	1	1	1
7	G0	P	M	L	2013	1	1
7	G0	P	M	L	2013	1	1
7	G0	P	M	L	2013	1	1	0
7	G0	P	M	L	2013	0
7	G0	P	M	L	2013	0
7	G0	P	M	L	2013	1	0
7	G0	P	M	L	2013	1	0
7	G0	P	M	L	2013	1	0
7	G0	P	M	L	2013	0
7	G0	P	M	L	2013	0
7	G0	P	M	L	2013	1	1	1	1
7	G0	P	M	L	2013	0
7	G0	P	M	L	2013	1	1
7	G0	P	M	L	2013	1	0
7	G0	P	M	L	2013	0
7	G0	P	M	L	2013	1	0
7	G0	P	M	L	2013	0
7	G0	P	M	L	2013	1	0
7	G0	P	M	L	2013	1	1	1	1
7	G0	P	M	L	2013	1	1
7	G0	P	M	L	2013	1	1	1	1
7	G0	P	M	L	2013	1	1
7	G0	P	M	L	2013	0
7	G0	P	M	L	2013	1	0
7	G0	P	M	L	2013	0
7	G0	P	M	L	2013	1	1
7	G0	P	M	L	2013	1	1
7	G0	P	M	L	2013	1	1	1	1
7	G0	P	M	L	2013	0
7	G0	P	M	L	2013	0
7	G0	P	M	L	2013	1	1	1	1
7	G0	P	M	L	2013	1	0
7	G0	P	M	L	2013	0
7	G0	P	M	L	2013	0
8	G0	P	M	L	2013	0
8	G0	P	M	L	2013	0
8	G0	P	M	L	2013	0
8	G0	P	M	L	2013	0
8	G0	P	M	L	2013	0
8	G0	P	M	L	2013	0
8	G0	P	M	L	2013	0
8	G0	P	M	L	2013	0
8	G0	P	M	L	2013	0
8	G0	P	M	L	2013	0
8	G0	P	M	L	2013	0
8	G0	P	M	L	2013	1	1	1	1
8	G0	P	M	L	2013	0
8	G0	P	M	L	2013	0
8	G0	P	M	L	2013	0
8	G0	P	M	L	2013	0
8	G0	P	M	L	2013	0
8	G0	P	M	L	2013	0
8	G0	P	M	L	2013	1	0
8	G0	P	M	L	2013	0
8	G0	P	M	L	2013	1	0
8	G0	P	M	L	2013	1	0
8	G0	P	M	L	2013	0
8	G0	P	M	L	2013	1	1	1	1
8	G0	P	M	L	2013	0
8	G0	P	M	L	2013	1	1	1	1
8	G0	P	M	L	2013	1	0
8	G0	P	M	L	2013	1	1	1	1
8	G0	P	M	L	2013	0
8	G0	P	M	L	2013	0
8	G0	P	M	L	2013	0
8	G0	P	M	L	2013	1	1	0
8	G0	P	M	L	2013	0
8	G0	P	M	L	2013	0
8	G0	P	M	L	2013	0
8	G0	P	M	L	2013	1	0
8	G0	P	M	L	2013	1	1	1	1
8	G0	P	M	L	2013	0
8	G0	P	M	L	2013	0
8	G0	P	M	L	2013	0
8	G0	P	M	L	2013	0
8	G0	P	M	L	2013	0
8	G0	P	M	L	2013	1	1	0
8	G0	P	M	L	2013	0
8	G0	P	M	L	2013	0
8	G0	P	M	L	2013	0
8	G0	P	M	L	2013	1	1	0
8	G0	P	M	L	2013	1	1
8	G0	P	M	L	2013	0
8	G0	P	M	L	2013	0
8	G0	P	M	L	2013	0
8	G0	P	M	L	2013	0
8	G0	P	M	L	2013	0
8	G0	P	M	L	2013	0
8	G0	P	M	L	2013	0
8	G0	P	M	L	2013	0
8	G0	P	M	L	2013	0
8	G0	P	M	L	2013	0
8	G0	P	M	L	2013	1	1	0
8	G0	P	M	L	2013	0
8	G0	P	M	L	2013	0
8	G0	P	M	L	2013	0
8	G0	P	M	L	2013	0
9	G0	P	L	L	2013	0
9	G0	P	L	L	2013	0
9	G0	P	L	L	2013	1	1	1	0
9	G0	P	L	L	2013	1	1	1	1
9	G0	P	L	L	2013	1	1
9	G0	P	L	L	2013	0
9	G0	P	L	L	2013	1	1
9	G0	P	L	L	2013	1	1
9	G0	P	L	L	2013	1	1	1	1
9	G0	P	L	L	2013	1	0
9	G0	P	L	L	2013	1	0
9	G0	P	L	L	2013	0
9	G0	P	L	L	2013	1	0
9	G0	P	L	L	2013	1	0
9	G0	P	L	L	2013	0
9	G0	P	L	L	2013	1	1
9	G0	P	L	L	2013	0
9	G0	P	L	L	2013	1	1	1	1
9	G0	P	L	L	2013	0
9	G0	P	L	L	2013	0
9	G0	P	L	L	2013	0
9	G0	P	L	L	2013	0
9	G0	P	L	L	2013	1	0
9	G0	P	L	L	2013	1	1	1	1
9	G0	P	L	L	2013	1	1	1	1
9	G0	P	L	L	2013	1	1
9	G0	P	L	L	2013	1	1
9	G0	P	L	L	2013	0
9	G0	P	L	L	2013	1	1	1	1
9	G0	P	L	L	2013	1	1
9	G0	P	L	L	2013	1	1	1	1
9	G0	P	L	L	2013	0
9	G0	P	L	L	2013	1	1
9	G0	P	L	L	2013	1	1	1	1
9	G0	P	L	L	2013	0
9	G0	P	L	L	2013	0
9	G0	P	L	L	2013	1	1	1	1
9	G0	P	L	L	2013	1	0
9	G0	P	L	L	2013	1	0
9	G0	P	L	L	2013	0
9	G0	P	L	L	2013	0
9	G0	P	L	L	2013	1	1	1	1
9	G0	P	L	L	2013	1	1	1	1
9	G0	P	L	L	2013	0
9	G0	P	L	L	2013	0
9	G0	P	L	L	2013	1	0
9	G0	P	L	L	2013	0
9	G0	P	L	L	2013	1	1	1	1
9	G0	P	L	L	2013	1	0
9	G0	P	L	L	2013	1	0
9	G0	P	L	L	2013	1	0
9	G0	P	L	L	2013	1	0
9	G0	P	L	L	2013	0
9	G0	P	L	L	2013	0
9	G0	P	L	L	2013	1	1	1	0
9	G0	P	L	L	2013	0
9	G0	P	L	L	2013	1	0
9	G0	P	L	L	2013	0
9	G0	P	L	L	2013	0
9	G0	P	L	L	2013	0
9	G0	P	L	L	2013	1	0
9	G0	P	L	L	2013	1	0
9	G0	P	L	L	2013	1	1	1	1
10	G0	P	L	L	2013	1	0
10	G0	P	L	L	2013	0
10	G0	P	L	L	2013	1	0
10	G0	P	L	L	2013	0
10	G0	P	L	L	2013	0
10	G0	P	L	L	2013	0
10	G0	P	L	L	2013	0
10	G0	P	L	L	2013	1	1	1	1
10	G0	P	L	L	2013	1	0
10	G0	P	L	L	2013	1	0
10	G0	P	L	L	2013	0
10	G0	P	L	L	2013	0
10	G0	P	L	L	2013	0
10	G0	P	L	L	2013	0
10	G0	P	L	L	2013	1	0
10	G0	P	L	L	2013	1	0
10	G0	P	L	L	2013	0
10	G0	P	L	L	2013	0
10	G0	P	L	L	2013	0
10	G0	P	L	L	2013	0
10	G0	P	L	L	2013	0
10	G0	P	L	L	2013	0
10	G0	P	L	L	2013	0
10	G0	P	L	L	2013	1	1	1	1
10	G0	P	L	L	2013	0
10	G0	P	L	L	2013	0
10	G0	P	L	L	2013	1	1	1	1
10	G0	P	L	L	2013	0
10	G0	P	L	L	2013	0
10	G0	P	L	L	2013	1	0
10	G0	P	L	L	2013	1	1	1	1
10	G0	P	L	L	2013	1	0
10	G0	P	L	L	2013	0
10	G0	P	L	L	2013	0
10	G0	P	L	L	2013	0
10	G0	P	L	L	2013	1	0
10	G0	P	L	L	2013	0
10	G0	P	L	L	2013	0
10	G0	P	L	L	2013	0
10	G0	P	L	L	2013	1	0
10	G0	P	L	L	2013	1	0
10	G0	P	L	L	2013	1	0
10	G0	P	L	L	2013	0
10	G0	P	L	L	2013	0
10	G0	P	L	L	2013	0
10	G0	P	L	L	2013	0
10	G0	P	L	L	2013	0
10	G0	P	L	L	2013	0
10	G0	P	L	L	2013	1	0
10	G0	P	L	L	2013	1	0
10	G0	P	L	L	2013	0
10	G0	P	L	L	2013	0
10	G0	P	L	L	2013	0
10	G0	P	L	L	2013	0
10	G0	P	L	L	2013	1	0
10	G0	P	L	L	2013	1	0
10	G0	P	L	L	2013	0
10	G0	P	L	L	2013	0
10	G0	P	L	L	2013	0
10	G0	P	L	L	2013	0
10	G0	P	L	L	2013	1	0
10	G0	P	L	L	2013	0
10	G0	P	L	L	2013	0
11	G0	P	M	M	2013	0
11	G0	P	M	M	2013	1	0
11	G0	P	M	M	2013	0
11	G0	P	M	M	2013	0
11	G0	P	M	M	2013	0
11	G0	P	M	M	2013	1	1	1	1
11	G0	P	M	M	2013	1	0
11	G0	P	M	M	2013	1	0
11	G0	P	M	M	2013	0
11	G0	P	M	M	2013	0
11	G0	P	M	M	2013	1	1	1	1
11	G0	P	M	M	2013	0
11	G0	P	M	M	2013	0
11	G0	P	M	M	2013	0
11	G0	P	M	M	2013	0
11	G0	P	M	M	2013	1	0
11	G0	P	M	M	2013	0
11	G0	P	M	M	2013	0
11	G0	P	M	M	2013	0
11	G0	P	M	M	2013	0
11	G0	P	M	M	2013	0
11	G0	P	M	M	2013	1	0
11	G0	P	M	M	2013	1	0
11	G0	P	M	M	2013	1	0
11	G0	P	M	M	2013	0
11	G0	P	M	M	2013	0
11	G0	P	M	M	2013	1	0
11	G0	P	M	M	2013	0
11	G0	P	M	M	2013	0
11	G0	P	M	M	2013	0
11	G0	P	M	M	2013	0
11	G0	P	M	M	2013	0
11	G0	P	M	M	2013	0
11	G0	P	M	M	2013	0
11	G0	P	M	M	2013	0
11	G0	P	M	M	2013	0
11	G0	P	M	M	2013	0
11	G0	P	M	M	2013	0
11	G0	P	M	M	2013	0
11	G0	P	M	M	2013	0
11	G0	P	M	M	2013	0
11	G0	P	M	M	2013	0
11	G0	P	M	M	2013	0
11	G0	P	M	M	2013	0
11	G0	P	M	M	2013	0
11	G0	P	M	M	2013	1	0
11	G0	P	M	M	2013	0
11	G0	P	M	M	2013	0
11	G0	P	M	M	2013	0
11	G0	P	M	M	2013	0
11	G0	P	M	M	2013	0
11	G0	P	M	M	2013	0
11	G0	P	M	M	2013	0
11	G0	P	M	M	2013	1	0
11	G0	P	M	M	2013	0
11	G0	P	M	M	2013	0
11	G0	P	M	M	2013	0
11	G0	P	M	M	2013	0
11	G0	P	M	M	2013	1	0
11	G0	P	M	M	2013	1	0
11	G0	P	M	M	2013	0
11	G0	P	M	M	2013	0
11	G0	P	M	M	2013	0
12	G0	P	M	M	2013	1	0
12	G0	P	M	M	2013	0
12	G0	P	M	M	2013	0
12	G0	P	M	M	2013	0
12	G0	P	M	M	2013	1	0
12	G0	P	M	M	2013	0
12	G0	P	M	M	2013	1	0
12	G0	P	M	M	2013	0
12	G0	P	M	M	2013	0
12	G0	P	M	M	2013	0
12	G0	P	M	M	2013	0
12	G0	P	M	M	2013	0
12	G0	P	M	M	2013	0
12	G0	P	M	M	2013	0
12	G0	P	M	M	2013	1	0
12	G0	P	M	M	2013	0
12	G0	P	M	M	2013	1	0
12	G0	P	M	M	2013	0
12	G0	P	M	M	2013	1	0
12	G0	P	M	M	2013	0
12	G0	P	M	M	2013	0
12	G0	P	M	M	2013	0
12	G0	P	M	M	2013	0
12	G0	P	M	M	2013	1	0
12	G0	P	M	M	2013	0
12	G0	P	M	M	2013	1	0
12	G0	P	M	M	2013	0
12	G0	P	M	M	2013	0
12	G0	P	M	M	2013	0
12	G0	P	M	M	2013	0
12	G0	P	M	M	2013	0
12	G0	P	M	M	2013	0
12	G0	P	M	M	2013	0
12	G0	P	M	M	2013	0
12	G0	P	M	M	2013	0
12	G0	P	M	M	2013	1	0
12	G0	P	M	M	2013	0
12	G0	P	M	M	2013	1	1	1	1
12	G0	P	M	M	2013	1	0
12	G0	P	M	M	2013	0
12	G0	P	M	M	2013	1	0
12	G0	P	M	M	2013	1	0
12	G0	P	M	M	2013	0
12	G0	P	M	M	2013	1	0
12	G0	P	M	M	2013	0
12	G0	P	M	M	2013	0
12	G0	P	M	M	2013	0
12	G0	P	M	M	2013	0
12	G0	P	M	M	2013	0
12	G0	P	M	M	2013	1	0
12	G0	P	M	M	2013	0
12	G0	P	M	M	2013	0
12	G0	P	M	M	2013	0
12	G0	P	M	M	2013	0
12	G0	P	M	M	2013	0
12	G0	P	M	M	2013	0
12	G0	P	M	M	2013	0
12	G0	P	M	M	2013	0
12	G0	P	M	M	2013	1	0
12	G0	P	M	M	2013	0
12	G0	P	M	M	2013	0
12	G0	P	M	M	2013	1	0
12	G0	P	M	M	2013	0
13	G0	P	M	M	2013	0
13	G0	P	M	M	2013	0
13	G0	P	M	M	2013	0
13	G0	P	M	M	2013	0
13	G0	P	M	M	2013	0
13	G0	P	M	M	2013	0
13	G0	P	M	M	2013	1	1	1	1
13	G0	P	M	M	2013	0
13	G0	P	M	M	2013	1	1
13	G0	P	M	M	2013	0
13	G0	P	M	M	2013	0
13	G0	P	M	M	2013	0
13	G0	P	M	M	2013	0
13	G0	P	M	M	2013	1	0
13	G0	P	M	M	2013	1	0
13	G0	P	M	M	2013	0
13	G0	P	M	M	2013	1	0
13	G0	P	M	M	2013	1	1	1	1
13	G0	P	M	M	2013	1	1	1	1
13	G0	P	M	M	2013	1	0
13	G0	P	M	M	2013	0
13	G0	P	M	M	2013	0
13	G0	P	M	M	2013	0
13	G0	P	M	M	2013	0
13	G0	P	M	M	2013	1	1	1	1
13	G0	P	M	M	2013	0
13	G0	P	M	M	2013	0
13	G0	P	M	M	2013	0
13	G0	P	M	M	2013	0
13	G0	P	M	M	2013	0
13	G0	P	M	M	2013	0
13	G0	P	M	M	2013	1	1	1	1
13	G0	P	M	M	2013	0
13	G0	P	M	M	2013	1	1
13	G0	P	M	M	2013	1	1	1	1
13	G0	P	M	M	2013	0
13	G0	P	M	M	2013	1	0
13	G0	P	M	M	2013	1	0
13	G0	P	M	M	2013	0
13	G0	P	M	M	2013	0
13	G0	P	M	M	2013	1	0
13	G0	P	M	M	2013	0
13	G0	P	M	M	2013	0
13	G0	P	M	M	2013	0
13	G0	P	M	M	2013	0
13	G0	P	M	M	2013	0
13	G0	P	M	M	2013	0
13	G0	P	M	M	2013	0
13	G0	P	M	M	2013	0
13	G0	P	M	M	2013	0
13	G0	P	M	M	2013	0
13	G0	P	M	M	2013	1	1	1	1
13	G0	P	M	M	2013	0
13	G0	P	M	M	2013	0
13	G0	P	M	M	2013	0
13	G0	P	M	M	2013	0
13	G0	P	M	M	2013	0
13	G0	P	M	M	2013	0
13	G0	P	M	M	2013	0
13	G0	P	M	M	2013	0
13	G0	P	M	M	2013	0
13	G0	P	M	M	2013	0
13	G0	P	M	M	2013	0
14	G0	P	M	M	2013	1	0
14	G0	P	M	M	2013	0
14	G0	P	M	M	2013	0
14	G0	P	M	M	2013	0
14	G0	P	M	M	2013	1	0
14	G0	P	M	M	2013	0
14	G0	P	M	M	2013	0
14	G0	P	M	M	2013	1	0
14	G0	P	M	M	2013	0
14	G0	P	M	M	2013	0
14	G0	P	M	M	2013	0
14	G0	P	M	M	2013	0
14	G0	P	M	M	2013	1	1	1	1
14	G0	P	M	M	2013	0
14	G0	P	M	M	2013	0
14	G0	P	M	M	2013	0
14	G0	P	M	M	2013	1	0
14	G0	P	M	M	2013	0
14	G0	P	M	M	2013	0
14	G0	P	M	M	2013	0
14	G0	P	M	M	2013	0
14	G0	P	M	M	2013	0
14	G0	P	M	M	2013	0
14	G0	P	M	M	2013	1	0
14	G0	P	M	M	2013	0
14	G0	P	M	M	2013	0
14	G0	P	M	M	2013	0
14	G0	P	M	M	2013	0
14	G0	P	M	M	2013	1	0
14	G0	P	M	M	2013	0
14	G0	P	M	M	2013	0
14	G0	P	M	M	2013	0
14	G0	P	M	M	2013	0
14	G0	P	M	M	2013	0
14	G0	P	M	M	2013	1	0
14	G0	P	M	M	2013	0
14	G0	P	M	M	2013	0
14	G0	P	M	M	2013	1	0
14	G0	P	M	M	2013	0
14	G0	P	M	M	2013	0
14	G0	P	M	M	2013	0
14	G0	P	M	M	2013	1	0
14	G0	P	M	M	2013	0
14	G0	P	M	M	2013	0
14	G0	P	M	M	2013	1	0
14	G0	P	M	M	2013	0
14	G0	P	M	M	2013	0
14	G0	P	M	M	2013	0
14	G0	P	M	M	2013	0
14	G0	P	M	M	2013	0
14	G0	P	M	M	2013	1	0
14	G0	P	M	M	2013	0
14	G0	P	M	M	2013	0
14	G0	P	M	M	2013	0
14	G0	P	M	M	2013	0
14	G0	P	M	M	2013	0
14	G0	P	M	M	2013	1	0
14	G0	P	M	M	2013	0
14	G0	P	M	M	2013	1	0
14	G0	P	M	M	2013	1	0
14	G0	P	M	M	2013	1	0
14	G0	P	M	M	2013	0
14	G0	P	M	M	2013	0
15	G0	P	L	L	2013	0
15	G0	P	L	L	2013	0
15	G0	P	L	L	2013	1	1	1	1
15	G0	P	L	L	2013	0
15	G0	P	L	L	2013	0
15	G0	P	L	L	2013	0
15	G0	P	L	L	2013	0
15	G0	P	L	L	2013	1	1	1	1
15	G0	P	L	L	2013	0
15	G0	P	L	L	2013	0
15	G0	P	L	L	2013	0
15	G0	P	L	L	2013	0
15	G0	P	L	L	2013	0
15	G0	P	L	L	2013	0
15	G0	P	L	L	2013	1	1	1	1
15	G0	P	L	L	2013	1	1	1	1
15	G0	P	L	L	2013	0
15	G0	P	L	L	2013	0
15	G0	P	L	L	2013	1	0
15	G0	P	L	L	2013	0
15	G0	P	L	L	2013	0
15	G0	P	L	L	2013	0
15	G0	P	L	L	2013	1	1	1	1
15	G0	P	L	L	2013	0
15	G0	P	L	L	2013	1	0
15	G0	P	L	L	2013	1	0
15	G0	P	L	L	2013	0
15	G0	P	L	L	2013	0
15	G0	P	L	L	2013	0
15	G0	P	L	L	2013	0
15	G0	P	L	L	2013	1	0
15	G0	P	L	L	2013	1	1	1	1
15	G0	P	L	L	2013	0
15	G0	P	L	L	2013	0
15	G0	P	L	L	2013	1	1	1	1
15	G0	P	L	L	2013	1	0
15	G0	P	L	L	2013	0
15	G0	P	L	L	2013	1	1	1	1
15	G0	P	L	L	2013	0
15	G0	P	L	L	2013	0
15	G0	P	L	L	2013	1	1	1	1
15	G0	P	L	L	2013	0
15	G0	P	L	L	2013	0
15	G0	P	L	L	2013	0
15	G0	P	L	L	2013	0
15	G0	P	L	L	2013	1	1
15	G0	P	L	L	2013	1	1	1	1
15	G0	P	L	L	2013	1	1
15	G0	P	L	L	2013	0
15	G0	P	L	L	2013	1	1	1	1
15	G0	P	L	L	2013	0
15	G0	P	L	L	2013	0
15	G0	P	L	L	2013	1	0
15	G0	P	L	L	2013	0
15	G0	P	L	L	2013	1	1
15	G0	P	L	L	2013	1	1	1	1
15	G0	P	L	L	2013	1	0
15	G0	P	L	L	2013	0
15	G0	P	L	L	2013	1	0
15	G0	P	L	L	2013	0
15	G0	P	L	L	2013	0
15	G0	P	L	L	2013	1	0
15	G0	P	L	L	2013	1	0
16	G0	P	L	L	2013	0
16	G0	P	L	L	2013	1	1	1	1
16	G0	P	L	L	2013	0
16	G0	P	L	L	2013	1	0
16	G0	P	L	L	2013	1	1	1	0
16	G0	P	L	L	2013	1	0
16	G0	P	L	L	2013	1	1	0
16	G0	P	L	L	2013	0
16	G0	P	L	L	2013	1	0
16	G0	P	L	L	2013	0
16	G0	P	L	L	2013	1	0
16	G0	P	L	L	2013	0
16	G0	P	L	L	2013	0
16	G0	P	L	L	2013	0
16	G0	P	L	L	2013	0
16	G0	P	L	L	2013	0
16	G0	P	L	L	2013	0
16	G0	P	L	L	2013	0
16	G0	P	L	L	2013	0
16	G0	P	L	L	2013	1	0
16	G0	P	L	L	2013	1	0
16	G0	P	L	L	2013	0
16	G0	P	L	L	2013	0
16	G0	P	L	L	2013	0
16	G0	P	L	L	2013	1	0
16	G0	P	L	L	2013	1	1	1	0
16	G0	P	L	L	2013	0
16	G0	P	L	L	2013	0
16	G0	P	L	L	2013	0
16	G0	P	L	L	2013	0
16	G0	P	L	L	2013	1	0
16	G0	P	L	L	2013	0
16	G0	P	L	L	2013	0
16	G0	P	L	L	2013	0
16	G0	P	L	L	2013	0
16	G0	P	L	L	2013	0
16	G0	P	L	L	2013	0
16	G0	P	L	L	2013	0
16	G0	P	L	L	2013	0
16	G0	P	L	L	2013	0
16	G0	P	L	L	2013	0
16	G0	P	L	L	2013	0
16	G0	P	L	L	2013	0
16	G0	P	L	L	2013	0
16	G0	P	L	L	2013	1	1	1	1
16	G0	P	L	L	2013	1	1	1	1
16	G0	P	L	L	2013	1	0
16	G0	P	L	L	2013	1	0
16	G0	P	L	L	2013	1	1	1	1
16	G0	P	L	L	2013	0
16	G0	P	L	L	2013	0
16	G0	P	L	L	2013	0
16	G0	P	L	L	2013	1	0
16	G0	P	L	L	2013	0
16	G0	P	L	L	2013	0
16	G0	P	L	L	2013	1	1
16	G0	P	L	L	2013	1	1	1	1
16	G0	P	L	L	2013	0
16	G0	P	L	L	2013	0
16	G0	P	L	L	2013	0
16	G0	P	L	L	2013	0
16	G0	P	L	L	2013	0
16	G0	P	L	L	2013	0
1	G0	P	L	M	2014	0
1	G0	P	L	M	2014	0
1	G0	P	L	M	2014	0
1	G0	P	L	M	2014	0
1	G0	P	L	M	2014	0
1	G0	P	L	M	2014	1	0
1	G0	P	L	M	2014	0
1	G0	P	L	M	2014	0
1	G0	P	L	M	2014	1	1	1	1
1	G0	P	L	M	2014	0
1	G0	P	L	M	2014	1	0
1	G0	P	L	M	2014	1	1	1	1
1	G0	P	L	M	2014	0
1	G0	P	L	M	2014	1	0
1	G0	P	L	M	2014	0
1	G0	P	L	M	2014	0
1	G0	P	L	M	2014	0
1	G0	P	L	M	2014	1	1	1	1
1	G0	P	L	M	2014	0
1	G0	P	L	M	2014	0
1	G0	P	L	M	2014	0
1	G0	P	L	M	2014	0
1	G0	P	L	M	2014	0
1	G0	P	L	M	2014	1	1	1	1
1	G0	P	L	M	2014	1	1	1	1
1	G0	P	L	M	2014	0
1	G0	P	L	M	2014	0
1	G0	P	L	M	2014	0
1	G0	P	L	M	2014	1	1	0
1	G0	P	L	M	2014	0
1	G0	P	L	M	2014	0
1	G0	P	L	M	2014	1	1	1	1
1	G0	P	L	M	2014	0
1	G0	P	L	M	2014	0
1	G0	P	L	M	2014	1	1	0
1	G0	P	L	M	2014	0
1	G0	P	L	M	2014	1	1	1	1
1	G0	P	L	M	2014	1	1
1	G0	P	L	M	2014	0
1	G0	P	L	M	2014	1	1	1	1
1	G0	P	L	M	2014	0
1	G0	P	L	M	2014	0
1	G0	P	L	M	2014	1	0
1	G0	P	L	M	2014	1	1	1	1
1	G0	P	L	M	2014	0
1	G0	P	L	M	2014	0
1	G0	P	L	M	2014	0
1	G0	P	L	M	2014	0
1	G0	P	L	M	2014	0
1	G0	P	L	M	2014	1	1	1	1
1	G0	P	L	M	2014	0
1	G0	P	L	M	2014	0
1	G0	P	L	M	2014	0
1	G0	P	L	M	2014	0
1	G0	P	L	M	2014	0
1	G0	P	L	M	2014	1	1	1	1
1	G0	P	L	M	2014	0
1	G0	P	L	M	2014	0
1	G0	P	L	M	2014	1	1	1	1
1	G0	P	L	M	2014	0
1	G0	P	L	M	2014	1	1	1	1
1	G0	P	L	M	2014	0
1	G0	P	L	M	2014	0
2	G0	P	L	M	2014	1	0
2	G0	P	L	M	2014	0
2	G0	P	L	M	2014	0
2	G0	P	L	M	2014	1	0
2	G0	P	L	M	2014	1	1	1	0
2	G0	P	L	M	2014	0
2	G0	P	L	M	2014	0
2	G0	P	L	M	2014	1	1	1	1
2	G0	P	L	M	2014	1	1
2	G0	P	L	M	2014	0
2	G0	P	L	M	2014	0
2	G0	P	L	M	2014	0
2	G0	P	L	M	2014	0
2	G0	P	L	M	2014	1	1	1	1
2	G0	P	L	M	2014	1	1
2	G0	P	L	M	2014	1	1
2	G0	P	L	M	2014	1	1	1	1
2	G0	P	L	M	2014	0
2	G0	P	L	M	2014	0
2	G0	P	L	M	2014	0
2	G0	P	L	M	2014	1	0
2	G0	P	L	M	2014	1	0
2	G0	P	L	M	2014	1	1	1	0
2	G0	P	L	M	2014	0
2	G0	P	L	M	2014	1	1
2	G0	P	L	M	2014	1	1	1	1
2	G0	P	L	M	2014	0
2	G0	P	L	M	2014	0
2	G0	P	L	M	2014	0
2	G0	P	L	M	2014	1	1	1	1
2	G0	P	L	M	2014	1	1	1	0
2	G0	P	L	M	2014	1	1
2	G0	P	L	M	2014	0
2	G0	P	L	M	2014	1	1	1	1
2	G0	P	L	M	2014	0
2	G0	P	L	M	2014	0
2	G0	P	L	M	2014	1	1
2	G0	P	L	M	2014	1	1	1	0
2	G0	P	L	M	2014	1	1
2	G0	P	L	M	2014	0
2	G0	P	L	M	2014	0
2	G0	P	L	M	2014	0
2	G0	P	L	M	2014	0
2	G0	P	L	M	2014	0
2	G0	P	L	M	2014	0
2	G0	P	L	M	2014	0
2	G0	P	L	M	2014	1	1	0
2	G0	P	L	M	2014	0
2	G0	P	L	M	2014	1	1	0
2	G0	P	L	M	2014	1	1
2	G0	P	L	M	2014	1	1
2	G0	P	L	M	2014	0
2	G0	P	L	M	2014	1	0
2	G0	P	L	M	2014	1	0
2	G0	P	L	M	2014	0
2	G0	P	L	M	2014	0
2	G0	P	L	M	2014	0
2	G0	P	L	M	2014	0
2	G0	P	L	M	2014	1	1	0
2	G0	P	L	M	2014	0
2	G0	P	L	M	2014	0
2	G0	P	L	M	2014	0
2	G0	P	L	M	2014	0
3	G0	P	M	L	2014	0
3	G0	P	M	L	2014	0
3	G0	P	M	L	2014	0
3	G0	P	M	L	2014	1	0
3	G0	P	M	L	2014	0
3	G0	P	M	L	2014	1	0
3	G0	P	M	L	2014	1	0
3	G0	P	M	L	2014	1	1	1	1
3	G0	P	M	L	2014	0
3	G0	P	M	L	2014	0
3	G0	P	M	L	2014	1	0
3	G0	P	M	L	2014	0
3	G0	P	M	L	2014	0
3	G0	P	M	L	2014	1	1	1	1
3	G0	P	M	L	2014	0
3	G0	P	M	L	2014	0
3	G0	P	M	L	2014	0
3	G0	P	M	L	2014	0
3	G0	P	M	L	2014	0
3	G0	P	M	L	2014	0
3	G0	P	M	L	2014	1	1	1	1
3	G0	P	M	L	2014	1	1	0
3	G0	P	M	L	2014	0
3	G0	P	M	L	2014	0
3	G0	P	M	L	2014	1	1
3	G0	P	M	L	2014	1	1	1	1
3	G0	P	M	L	2014	1	1
3	G0	P	M	L	2014	1	1	1	1
3	G0	P	M	L	2014	0
3	G0	P	M	L	2014	1	1
3	G0	P	M	L	2014	0
3	G0	P	M	L	2014	0
3	G0	P	M	L	2014	1	1	1	0
3	G0	P	M	L	2014	0
3	G0	P	M	L	2014	0
3	G0	P	M	L	2014	1	1	0
3	G0	P	M	L	2014	1	1	1	1
3	G0	P	M	L	2014	1	1
3	G0	P	M	L	2014	1	0
3	G0	P	M	L	2014	0
3	G0	P	M	L	2014	1	1	1	1
3	G0	P	M	L	2014	0
3	G0	P	M	L	2014	1	1	1	1
3	G0	P	M	L	2014	0
3	G0	P	M	L	2014	1	0
3	G0	P	M	L	2014	1	1
3	G0	P	M	L	2014	0
3	G0	P	M	L	2014	1	1	1	1
3	G0	P	M	L	2014	0
3	G0	P	M	L	2014	1	1	1	1
3	G0	P	M	L	2014	1	0
3	G0	P	M	L	2014	1	1	1	0
3	G0	P	M	L	2014	1	1
3	G0	P	M	L	2014	1	1
3	G0	P	M	L	2014	0
3	G0	P	M	L	2014	0
3	G0	P	M	L	2014	1	1	0
3	G0	P	M	L	2014	0
3	G0	P	M	L	2014	0
3	G0	P	M	L	2014	0
3	G0	P	M	L	2014	1	1	0
3	G0	P	M	L	2014	0
3	G0	P	M	L	2014	1	0
4	G0	P	M	L	2014	1	0
4	G0	P	M	L	2014	0
4	G0	P	M	L	2014	0
4	G0	P	M	L	2014	0
4	G0	P	M	L	2014	1	0
4	G0	P	M	L	2014	0
4	G0	P	M	L	2014	0
4	G0	P	M	L	2014	0
4	G0	P	M	L	2014	0
4	G0	P	M	L	2014	1	0
4	G0	P	M	L	2014	0
4	G0	P	M	L	2014	1	0
4	G0	P	M	L	2014	0
4	G0	P	M	L	2014	0
4	G0	P	M	L	2014	0
4	G0	P	M	L	2014	0
4	G0	P	M	L	2014	0
4	G0	P	M	L	2014	0
4	G0	P	M	L	2014	0
4	G0	P	M	L	2014	0
4	G0	P	M	L	2014	0
4	G0	P	M	L	2014	0
4	G0	P	M	L	2014	0
4	G0	P	M	L	2014	1	1	1	1
4	G0	P	M	L	2014	0
4	G0	P	M	L	2014	0
4	G0	P	M	L	2014	0
4	G0	P	M	L	2014	1	0
4	G0	P	M	L	2014	0
4	G0	P	M	L	2014	0
4	G0	P	M	L	2014	0
4	G0	P	M	L	2014	1	1	1	1
4	G0	P	M	L	2014	0
4	G0	P	M	L	2014	0
4	G0	P	M	L	2014	0
4	G0	P	M	L	2014	0
4	G0	P	M	L	2014	0
4	G0	P	M	L	2014	0
4	G0	P	M	L	2014	1	0
4	G0	P	M	L	2014	0
4	G0	P	M	L	2014	0
4	G0	P	M	L	2014	1	1	0
4	G0	P	M	L	2014	0
4	G0	P	M	L	2014	0
4	G0	P	M	L	2014	0
4	G0	P	M	L	2014	1	1	1	1
4	G0	P	M	L	2014	0
4	G0	P	M	L	2014	0
4	G0	P	M	L	2014	1	0
4	G0	P	M	L	2014	1	0
4	G0	P	M	L	2014	1	1	0
4	G0	P	M	L	2014	1	1	1	0
4	G0	P	M	L	2014	1	0
4	G0	P	M	L	2014	0
4	G0	P	M	L	2014	1	1	1	1
4	G0	P	M	L	2014	0
4	G0	P	M	L	2014	0
4	G0	P	M	L	2014	0
4	G0	P	M	L	2014	1	1	0
4	G0	P	M	L	2014	0
4	G0	P	M	L	2014	1	1	1	1
4	G0	P	M	L	2014	0
4	G0	P	M	L	2014	0
5	G0	P	M	L	2014	0
5	G0	P	M	L	2014	1	0
5	G0	P	M	L	2014	0
5	G0	P	M	L	2014	0
5	G0	P	M	L	2014	0
5	G0	P	M	L	2014	0
5	G0	P	M	L	2014	0
5	G0	P	M	L	2014	0
5	G0	P	M	L	2014	0
5	G0	P	M	L	2014	0
5	G0	P	M	L	2014	1	0
5	G0	P	M	L	2014	1	0
5	G0	P	M	L	2014	0
5	G0	P	M	L	2014	0
5	G0	P	M	L	2014	0
5	G0	P	M	L	2014	1	1	0
5	G0	P	M	L	2014	0
5	G0	P	M	L	2014	1	0
5	G0	P	M	L	2014	0
5	G0	P	M	L	2014	0
5	G0	P	M	L	2014	0
5	G0	P	M	L	2014	0
5	G0	P	M	L	2014	0
5	G0	P	M	L	2014	0
5	G0	P	M	L	2014	1	1	0
5	G0	P	M	L	2014	1	1
5	G0	P	M	L	2014	0
5	G0	P	M	L	2014	0
5	G0	P	M	L	2014	0
5	G0	P	M	L	2014	0
5	G0	P	M	L	2014	0
5	G0	P	M	L	2014	0
5	G0	P	M	L	2014	0
5	G0	P	M	L	2014	0
5	G0	P	M	L	2014	0
5	G0	P	M	L	2014	0
5	G0	P	M	L	2014	0
5	G0	P	M	L	2014	0
5	G0	P	M	L	2014	1	1	1	0
5	G0	P	M	L	2014	0
5	G0	P	M	L	2014	0
5	G0	P	M	L	2014	0
5	G0	P	M	L	2014	0
5	G0	P	M	L	2014	0
5	G0	P	M	L	2014	0
5	G0	P	M	L	2014	0
5	G0	P	M	L	2014	1	1	1	1
5	G0	P	M	L	2014	0
5	G0	P	M	L	2014	0
5	G0	P	M	L	2014	0
5	G0	P	M	L	2014	0
5	G0	P	M	L	2014	0
5	G0	P	M	L	2014	0
5	G0	P	M	L	2014	0
5	G0	P	M	L	2014	1	1	1	1
5	G0	P	M	L	2014	0
5	G0	P	M	L	2014	0
5	G0	P	M	L	2014	1	0
5	G0	P	M	L	2014	0
5	G0	P	M	L	2014	0
5	G0	P	M	L	2014	0
5	G0	P	M	L	2014	0
5	G0	P	M	L	2014	0
6	G0	P	M	L	2014	0
6	G0	P	M	L	2014	0
6	G0	P	M	L	2014	0
6	G0	P	M	L	2014	0
6	G0	P	M	L	2014	1	1	1	1
6	G0	P	M	L	2014	0
6	G0	P	M	L	2014	0
6	G0	P	M	L	2014	0
6	G0	P	M	L	2014	0
6	G0	P	M	L	2014	0
6	G0	P	M	L	2014	0
6	G0	P	M	L	2014	0
6	G0	P	M	L	2014	0
6	G0	P	M	L	2014	0
6	G0	P	M	L	2014	0
6	G0	P	M	L	2014	0
6	G0	P	M	L	2014	1	1	1	1
6	G0	P	M	L	2014	0
6	G0	P	M	L	2014	1	1	0
6	G0	P	M	L	2014	0
6	G0	P	M	L	2014	1	1
6	G0	P	M	L	2014	0
6	G0	P	M	L	2014	1	1	0
6	G0	P	M	L	2014	0
6	G0	P	M	L	2014	1	0
6	G0	P	M	L	2014	1	1	0
6	G0	P	M	L	2014	0
6	G0	P	M	L	2014	1	1
6	G0	P	M	L	2014	1	1	1	0
6	G0	P	M	L	2014	1	0
6	G0	P	M	L	2014	1	1
6	G0	P	M	L	2014	1	1	0
6	G0	P	M	L	2014	0
6	G0	P	M	L	2014	0
6	G0	P	M	L	2014	0
6	G0	P	M	L	2014	0
6	G0	P	M	L	2014	0
6	G0	P	M	L	2014	0
6	G0	P	M	L	2014	0
6	G0	P	M	L	2014	1	1	0
6	G0	P	M	L	2014	0
6	G0	P	M	L	2014	0
6	G0	P	M	L	2014	0
6	G0	P	M	L	2014	0
6	G0	P	M	L	2014	0
6	G0	P	M	L	2014	1	1
6	G0	P	M	L	2014	1	1	0
6	G0	P	M	L	2014	1	0
6	G0	P	M	L	2014	0
6	G0	P	M	L	2014	1	0
6	G0	P	M	L	2014	0
6	G0	P	M	L	2014	0
6	G0	P	M	L	2014	0
6	G0	P	M	L	2014	0
6	G0	P	M	L	2014	1	1
6	G0	P	M	L	2014	1	0
6	G0	P	M	L	2014	1	1	1	0
6	G0	P	M	L	2014	1	0
6	G0	P	M	L	2014	1	1	0
6	G0	P	M	L	2014	1	0
6	G0	P	M	L	2014	1	0
6	G0	P	M	L	2014	1	0
6	G0	P	M	L	2014	1	0
7	G0	P	L	M	2014	0
7	G0	P	L	M	2014	0
7	G0	P	L	M	2014	1	1	0
7	G0	P	L	M	2014	1	1
7	G0	P	L	M	2014	1	1	1	1
7	G0	P	L	M	2014	0
7	G0	P	L	M	2014	1	0
7	G0	P	L	M	2014	0
7	G0	P	L	M	2014	0
7	G0	P	L	M	2014	0
7	G0	P	L	M	2014	0
7	G0	P	L	M	2014	1	1	0
7	G0	P	L	M	2014	0
7	G0	P	L	M	2014	1	1	0
7	G0	P	L	M	2014	0
7	G0	P	L	M	2014	0
7	G0	P	L	M	2014	0
7	G0	P	L	M	2014	1	1	1	0
7	G0	P	L	M	2014	0
7	G0	P	L	M	2014	1	1	1	1
7	G0	P	L	M	2014	1	0
7	G0	P	L	M	2014	1	0
7	G0	P	L	M	2014	1	1	1	1
7	G0	P	L	M	2014	1	0
7	G0	P	L	M	2014	1	1	1	1
7	G0	P	L	M	2014	0
7	G0	P	L	M	2014	0
7	G0	P	L	M	2014	1	0
7	G0	P	L	M	2014	1	1	1	1
7	G0	P	L	M	2014	1	0
7	G0	P	L	M	2014	0
7	G0	P	L	M	2014	1	1	1	0
7	G0	P	L	M	2014	1	0
7	G0	P	L	M	2014	0
7	G0	P	L	M	2014	0
7	G0	P	L	M	2014	0
7	G0	P	L	M	2014	0
7	G0	P	L	M	2014	0
7	G0	P	L	M	2014	0
7	G0	P	L	M	2014	1	1	1	1
7	G0	P	L	M	2014	0
7	G0	P	L	M	2014	0
7	G0	P	L	M	2014	0
7	G0	P	L	M	2014	1	1	0
7	G0	P	L	M	2014	0
7	G0	P	L	M	2014	1	0
7	G0	P	L	M	2014	1	1	1	1
7	G0	P	L	M	2014	0
7	G0	P	L	M	2014	0
7	G0	P	L	M	2014	1	1	1	1
7	G0	P	L	M	2014	0
7	G0	P	L	M	2014	0
7	G0	P	L	M	2014	0
7	G0	P	L	M	2014	1	1	1	0
7	G0	P	L	M	2014	1	1	1	1
7	G0	P	L	M	2014	1	0
7	G0	P	L	M	2014	0
7	G0	P	L	M	2014	1	1	1	1
7	G0	P	L	M	2014	0
7	G0	P	L	M	2014	0
7	G0	P	L	M	2014	0
7	G0	P	L	M	2014	1	1	1	1
7	G0	P	L	M	2014	0
8	G0	P	L	M	2014	1	1	0
8	G0	P	L	M	2014	1	1
8	G0	P	L	M	2014	0
8	G0	P	L	M	2014	0
8	G0	P	L	M	2014	1	1	1	0
8	G0	P	L	M	2014	0
8	G0	P	L	M	2014	1	1	0
8	G0	P	L	M	2014	0
8	G0	P	L	M	2014	0
8	G0	P	L	M	2014	0
8	G0	P	L	M	2014	0
8	G0	P	L	M	2014	1	1	1	0
8	G0	P	L	M	2014	0
8	G0	P	L	M	2014	0
8	G0	P	L	M	2014	1	1	1	0
8	G0	P	L	M	2014	1	1	0
8	G0	P	L	M	2014	0
8	G0	P	L	M	2014	0
8	G0	P	L	M	2014	0
8	G0	P	L	M	2014	0
8	G0	P	L	M	2014	0
8	G0	P	L	M	2014	1	1
8	G0	P	L	M	2014	0
8	G0	P	L	M	2014	1	1	1	1
8	G0	P	L	M	2014	1	1	1	1
8	G0	P	L	M	2014	0
8	G0	P	L	M	2014	0
8	G0	P	L	M	2014	1	1	1
8	G0	P	L	M	2014	0
8	G0	P	L	M	2014	1	1		1
8	G0	P	L	M	2014	0
8	G0	P	L	M	2014	1	1
8	G0	P	L	M	2014	1	1	0
8	G0	P	L	M	2014	0
8	G0	P	L	M	2014	0
8	G0	P	L	M	2014	0
8	G0	P	L	M	2014	1	0
8	G0	P	L	M	2014	0
8	G0	P	L	M	2014	0
8	G0	P	L	M	2014	1	0
8	G0	P	L	M	2014	1	1	0
8	G0	P	L	M	2014	1	0
8	G0	P	L	M	2014	1	0
8	G0	P	L	M	2014	0
8	G0	P	L	M	2014	1	0
8	G0	P	L	M	2014	0
8	G0	P	L	M	2014	0
8	G0	P	L	M	2014	0
8	G0	P	L	M	2014	0
8	G0	P	L	M	2014	0
8	G0	P	L	M	2014	1	1	0
8	G0	P	L	M	2014	0
8	G0	P	L	M	2014	1	0
8	G0	P	L	M	2014	0
8	G0	P	L	M	2014	0
8	G0	P	L	M	2014	1	0
8	G0	P	L	M	2014	1	1	1	1
8	G0	P	L	M	2014	1	1	1	0
8	G0	P	L	M	2014	1	0
8	G0	P	L	M	2014	1	0
8	G0	P	L	M	2014	1	0
8	G0	P	L	M	2014	1	0
8	G0	P	L	M	2014	0
9	G0	P	L	L	2014	0
9	G0	P	L	L	2014	0
9	G0	P	L	L	2014	1	0
9	G0	P	L	L	2014	0
9	G0	P	L	L	2014	0
9	G0	P	L	L	2014	0
9	G0	P	L	L	2014	0
9	G0	P	L	L	2014	0
9	G0	P	L	L	2014	0
9	G0	P	L	L	2014	0
9	G0	P	L	L	2014	0
9	G0	P	L	L	2014	1	0
9	G0	P	L	L	2014	1	1
9	G0	P	L	L	2014	1	1	1	1
9	G0	P	L	L	2014	1	1
9	G0	P	L	L	2014	0
9	G0	P	L	L	2014	0
9	G0	P	L	L	2014	0
9	G0	P	L	L	2014	0
9	G0	P	L	L	2014	0
9	G0	P	L	L	2014	0
9	G0	P	L	L	2014	0
9	G0	P	L	L	2014	0
9	G0	P	L	L	2014	0
9	G0	P	L	L	2014	0
9	G0	P	L	L	2014	0
9	G0	P	L	L	2014	0
9	G0	P	L	L	2014	0
9	G0	P	L	L	2014	0
9	G0	P	L	L	2014	0
9	G0	P	L	L	2014	0
9	G0	P	L	L	2014	1	0
9	G0	P	L	L	2014	0
9	G0	P	L	L	2014	1	1	0
9	G0	P	L	L	2014	0
9	G0	P	L	L	2014	0
9	G0	P	L	L	2014	0
9	G0	P	L	L	2014	0
9	G0	P	L	L	2014	0
9	G0	P	L	L	2014	0
9	G0	P	L	L	2014	0
9	G0	P	L	L	2014	0
9	G0	P	L	L	2014	0
9	G0	P	L	L	2014	0
9	G0	P	L	L	2014	0
9	G0	P	L	L	2014	0
9	G0	P	L	L	2014	1	0
9	G0	P	L	L	2014	0
9	G0	P	L	L	2014	1	0
9	G0	P	L	L	2014	1	0
9	G0	P	L	L	2014	0
9	G0	P	L	L	2014	0
9	G0	P	L	L	2014	0
9	G0	P	L	L	2014	0
9	G0	P	L	L	2014	0
9	G0	P	L	L	2014	1	1	1	1
9	G0	P	L	L	2014	0
9	G0	P	L	L	2014	0
9	G0	P	L	L	2014	0
9	G0	P	L	L	2014	0
9	G0	P	L	L	2014	0
9	G0	P	L	L	2014	0
9	G0	P	L	L	2014	0
10	G0	P	L	L	2014	0
10	G0	P	L	L	2014	0
10	G0	P	L	L	2014	0
10	G0	P	L	L	2014	0
10	G0	P	L	L	2014	1	1	0
10	G0	P	L	L	2014	0
10	G0	P	L	L	2014	1	1
10	G0	P	L	L	2014	1	1
10	G0	P	L	L	2014	1	1	1	1
10	G0	P	L	L	2014	0
10	G0	P	L	L	2014	0
10	G0	P	L	L	2014	0
10	G0	P	L	L	2014	0
10	G0	P	L	L	2014	0
10	G0	P	L	L	2014	1	1	1	1
10	G0	P	L	L	2014	0
10	G0	P	L	L	2014	0
10	G0	P	L	L	2014	0
10	G0	P	L	L	2014	0
10	G0	P	L	L	2014	0
10	G0	P	L	L	2014	0
10	G0	P	L	L	2014	0
10	G0	P	L	L	2014	0
10	G0	P	L	L	2014	0
10	G0	P	L	L	2014	0
10	G0	P	L	L	2014	0
10	G0	P	L	L	2014	0
10	G0	P	L	L	2014	0
10	G0	P	L	L	2014	1	1	1	1
10	G0	P	L	L	2014	0
10	G0	P	L	L	2014	1	1	1	1
10	G0	P	L	L	2014	0
10	G0	P	L	L	2014	0
10	G0	P	L	L	2014	0
10	G0	P	L	L	2014	0
10	G0	P	L	L	2014	0
10	G0	P	L	L	2014	1	0
10	G0	P	L	L	2014	1	1	1	1
10	G0	P	L	L	2014	0
10	G0	P	L	L	2014	1	1
10	G0	P	L	L	2014	1	1	1	1
10	G0	P	L	L	2014	0
10	G0	P	L	L	2014	0
10	G0	P	L	L	2014	0
10	G0	P	L	L	2014	0
10	G0	P	L	L	2014	1	1	0
10	G0	P	L	L	2014	0
10	G0	P	L	L	2014	0
10	G0	P	L	L	2014	0
10	G0	P	L	L	2014	0
10	G0	P	L	L	2014	0
10	G0	P	L	L	2014	1	1	0
10	G0	P	L	L	2014	0
10	G0	P	L	L	2014	0
10	G0	P	L	L	2014	0
10	G0	P	L	L	2014	1	0
10	G0	P	L	L	2014	0
10	G0	P	L	L	2014	0
10	G0	P	L	L	2014	0
10	G0	P	L	L	2014	0
10	G0	P	L	L	2014	0
10	G0	P	L	L	2014	1	1	1	1
10	G0	P	L	L	2014	0
11	G0	P	M	M	2014	1	1	0
11	G0	P	M	M	2014	0
11	G0	P	M	M	2014	0
11	G0	P	M	M	2014	1	1	1	1
11	G0	P	M	M	2014	0
11	G0	P	M	M	2014	0
11	G0	P	M	M	2014	1	0
11	G0	P	M	M	2014	1	1	0
11	G0	P	M	M	2014	0
11	G0	P	M	M	2014	0
11	G0	P	M	M	2014	0
11	G0	P	M	M	2014	0
11	G0	P	M	M	2014	1	1	1	0
11	G0	P	M	M	2014	0
11	G0	P	M	M	2014	0
11	G0	P	M	M	2014	1	1	1	0
11	G0	P	M	M	2014	0
11	G0	P	M	M	2014	1	1
11	G0	P	M	M	2014	0
11	G0	P	M	M	2014	1	1	1	1
11	G0	P	M	M	2014	0
11	G0	P	M	M	2014	0
11	G0	P	M	M	2014	0
11	G0	P	M	M	2014	0
11	G0	P	M	M	2014	0
11	G0	P	M	M	2014	0
11	G0	P	M	M	2014	0
11	G0	P	M	M	2014	1	0
11	G0	P	M	M	2014	0
11	G0	P	M	M	2014	1	1	1	1
11	G0	P	M	M	2014	1	1
11	G0	P	M	M	2014	1	0
11	G0	P	M	M	2014	1	1	1	1
11	G0	P	M	M	2014	0
11	G0	P	M	M	2014	0
11	G0	P	M	M	2014	0
11	G0	P	M	M	2014	0
11	G0	P	M	M	2014	1	0
11	G0	P	M	M	2014	0
11	G0	P	M	M	2014	0
11	G0	P	M	M	2014	1	1	1	1
11	G0	P	M	M	2014	0
11	G0	P	M	M	2014	0
11	G0	P	M	M	2014	0
11	G0	P	M	M	2014	1	1	0
11	G0	P	M	M	2014	1	0
11	G0	P	M	M	2014	1	1	1	1
11	G0	P	M	M	2014	0
11	G0	P	M	M	2014	0
11	G0	P	M	M	2014	1	1	1	1
11	G0	P	M	M	2014	0
11	G0	P	M	M	2014	0
11	G0	P	M	M	2014	0
11	G0	P	M	M	2014	0
11	G0	P	M	M	2014	0
11	G0	P	M	M	2014	1	1	1	1
11	G0	P	M	M	2014	1	1
11	G0	P	M	M	2014	0
11	G0	P	M	M	2014	1	1	1	1
11	G0	P	M	M	2014	0
11	G0	P	M	M	2014	0
11	G0	P	M	M	2014	1	1	1	1
11	G0	P	M	M	2014	0
12	G0	P	M	M	2014	1	1
12	G0	P	M	M	2014	0
12	G0	P	M	M	2014	1	1	1	1
12	G0	P	M	M	2014	1	1
12	G0	P	M	M	2014	0
12	G0	P	M	M	2014	1	1	1	1
12	G0	P	M	M	2014	1	1	1	1
12	G0	P	M	M	2014	0
12	G0	P	M	M	2014	1	1
12	G0	P	M	M	2014	0
12	G0	P	M	M	2014	1	1	1	1
12	G0	P	M	M	2014	1	1
12	G0	P	M	M	2014	1	1
12	G0	P	M	M	2014	1	1
12	G0	P	M	M	2014	1	1	1	1
12	G0	P	M	M	2014	1	1	1	1
12	G0	P	M	M	2014	0
12	G0	P	M	M	2014	1	1
12	G0	P	M	M	2014	0
12	G0	P	M	M	2014	0
12	G0	P	M	M	2014	1	0
12	G0	P	M	M	2014	1	1
12	G0	P	M	M	2014	1	1	1	1
12	G0	P	M	M	2014	0
12	G0	P	M	M	2014	0
12	G0	P	M	M	2014	1	1	1	1
12	G0	P	M	M	2014	0
12	G0	P	M	M	2014	0
12	G0	P	M	M	2014	0
12	G0	P	M	M	2014	0
12	G0	P	M	M	2014	0
12	G0	P	M	M	2014	0
12	G0	P	M	M	2014	1	1	1	1
12	G0	P	M	M	2014	0
12	G0	P	M	M	2014	0
12	G0	P	M	M	2014	0
12	G0	P	M	M	2014	1	1	1	1
12	G0	P	M	M	2014	0
12	G0	P	M	M	2014	0
12	G0	P	M	M	2014	0
12	G0	P	M	M	2014	0
12	G0	P	M	M	2014	1	1	1	0
12	G0	P	M	M	2014	1	0
12	G0	P	M	M	2014	0
12	G0	P	M	M	2014	1	1	1	1
12	G0	P	M	M	2014	0
12	G0	P	M	M	2014	0
12	G0	P	M	M	2014	1	1	0
12	G0	P	M	M	2014	0
12	G0	P	M	M	2014	0
12	G0	P	M	M	2014	0
12	G0	P	M	M	2014	0
12	G0	P	M	M	2014	0
12	G0	P	M	M	2014	0
12	G0	P	M	M	2014	1	1	1	0
12	G0	P	M	M	2014	0
12	G0	P	M	M	2014	1	0
12	G0	P	M	M	2014	0
12	G0	P	M	M	2014	1	1
12	G0	P	M	M	2014	1	1	1	1
12	G0	P	M	M	2014	1	1	1	1
12	G0	P	M	M	2014	1	1
12	G0	P	M	M	2014	1	0
13	G0	P	M	M	2014	0
13	G0	P	M	M	2014	0
13	G0	P	M	M	2014	0
13	G0	P	M	M	2014	0
13	G0	P	M	M	2014	0
13	G0	P	M	M	2014	0
13	G0	P	M	M	2014	1	1
13	G0	P	M	M	2014	0
13	G0	P	M	M	2014	1	1	1	1
13	G0	P	M	M	2014	0
13	G0	P	M	M	2014	0
13	G0	P	M	M	2014	0
13	G0	P	M	M	2014	0
13	G0	P	M	M	2014	0
13	G0	P	M	M	2014	0
13	G0	P	M	M	2014	0
13	G0	P	M	M	2014	0
13	G0	P	M	M	2014	0
13	G0	P	M	M	2014	0
13	G0	P	M	M	2014	0
13	G0	P	M	M	2014	1	0
13	G0	P	M	M	2014	1	1
13	G0	P	M	M	2014	1	1	1	1
13	G0	P	M	M	2014	0
13	G0	P	M	M	2014	0
13	G0	P	M	M	2014	0
13	G0	P	M	M	2014	1	1	1	1
13	G0	P	M	M	2014	0
13	G0	P	M	M	2014	0
13	G0	P	M	M	2014	0
13	G0	P	M	M	2014	0
13	G0	P	M	M	2014	1	1	1	0
13	G0	P	M	M	2014	0
13	G0	P	M	M	2014	0
13	G0	P	M	M	2014	0
13	G0	P	M	M	2014	1	0
13	G0	P	M	M	2014	0
13	G0	P	M	M	2014	0
13	G0	P	M	M	2014	1	1	1	1
13	G0	P	M	M	2014	0
13	G0	P	M	M	2014	0
13	G0	P	M	M	2014	0
13	G0	P	M	M	2014	0
13	G0	P	M	M	2014	0
13	G0	P	M	M	2014	0
13	G0	P	M	M	2014	0
13	G0	P	M	M	2014	0
13	G0	P	M	M	2014	0
13	G0	P	M	M	2014	0
13	G0	P	M	M	2014	0
13	G0	P	M	M	2014	0
13	G0	P	M	M	2014	0
13	G0	P	M	M	2014	0
13	G0	P	M	M	2014	0
13	G0	P	M	M	2014	0
13	G0	P	M	M	2014	0
13	G0	P	M	M	2014	0
13	G0	P	M	M	2014	0
13	G0	P	M	M	2014	0
13	G0	P	M	M	2014	0
13	G0	P	M	M	2014	1	0
13	G0	P	M	M	2014	0
13	G0	P	M	M	2014	0
14	G0	P	M	M	2014	0
14	G0	P	M	M	2014	0
14	G0	P	M	M	2014	0
14	G0	P	M	M	2014	0
14	G0	P	M	M	2014	1	1	0
14	G0	P	M	M	2014	0
14	G0	P	M	M	2014	0
14	G0	P	M	M	2014	1	1	0
14	G0	P	M	M	2014	0
14	G0	P	M	M	2014	0
14	G0	P	M	M	2014	0
14	G0	P	M	M	2014	0
14	G0	P	M	M	2014	0
14	G0	P	M	M	2014	0
14	G0	P	M	M	2014	0
14	G0	P	M	M	2014	1	1	1	1
14	G0	P	M	M	2014	0
14	G0	P	M	M	2014	0
14	G0	P	M	M	2014	0
14	G0	P	M	M	2014	0
14	G0	P	M	M	2014	0
14	G0	P	M	M	2014	1	1	1	1
14	G0	P	M	M	2014	0
14	G0	P	M	M	2014	0
14	G0	P	M	M	2014	0
14	G0	P	M	M	2014	1	1	1	1
14	G0	P	M	M	2014	0
14	G0	P	M	M	2014	1	1	1	1
14	G0	P	M	M	2014	0
14	G0	P	M	M	2014	0
14	G0	P	M	M	2014	1	1	1	1
14	G0	P	M	M	2014	0
14	G0	P	M	M	2014	0
14	G0	P	M	M	2014	0
14	G0	P	M	M	2014	1	1	0
14	G0	P	M	M	2014	0
14	G0	P	M	M	2014	1	1
14	G0	P	M	M	2014	0
14	G0	P	M	M	2014	1	1	1	1
14	G0	P	M	M	2014	0
14	G0	P	M	M	2014	0
14	G0	P	M	M	2014	1	0
14	G0	P	M	M	2014	1	1	0
14	G0	P	M	M	2014	0
14	G0	P	M	M	2014	0
14	G0	P	M	M	2014	0
14	G0	P	M	M	2014	0
14	G0	P	M	M	2014	0
14	G0	P	M	M	2014	0
14	G0	P	M	M	2014	0
14	G0	P	M	M	2014	0
14	G0	P	M	M	2014	0
14	G0	P	M	M	2014	0
14	G0	P	M	M	2014	0
14	G0	P	M	M	2014	0
14	G0	P	M	M	2014	0
14	G0	P	M	M	2014	0
14	G0	P	M	M	2014	0
14	G0	P	M	M	2014	0
14	G0	P	M	M	2014	0
14	G0	P	M	M	2014	0
14	G0	P	M	M	2014	0
14	G0	P	M	M	2014	0
15	G0	P	L	L	2014	0
15	G0	P	L	L	2014	0
15	G0	P	L	L	2014	0
15	G0	P	L	L	2014	0
15	G0	P	L	L	2014	0
15	G0	P	L	L	2014	1	1	0
15	G0	P	L	L	2014	0
15	G0	P	L	L	2014	0
15	G0	P	L	L	2014	0
15	G0	P	L	L	2014	0
15	G0	P	L	L	2014	0
15	G0	P	L	L	2014	0
15	G0	P	L	L	2014	0
15	G0	P	L	L	2014	0
15	G0	P	L	L	2014	0
15	G0	P	L	L	2014	0
15	G0	P	L	L	2014	0
15	G0	P	L	L	2014	0
15	G0	P	L	L	2014	0
15	G0	P	L	L	2014	0
15	G0	P	L	L	2014	0
15	G0	P	L	L	2014	0
15	G0	P	L	L	2014	0
15	G0	P	L	L	2014	0
15	G0	P	L	L	2014	0
15	G0	P	L	L	2014	1	1	1	1
15	G0	P	L	L	2014	0
15	G0	P	L	L	2014	0
15	G0	P	L	L	2014	0
15	G0	P	L	L	2014	0
15	G0	P	L	L	2014	0
15	G0	P	L	L	2014	0
15	G0	P	L	L	2014	0
15	G0	P	L	L	2014	0
15	G0	P	L	L	2014	0
15	G0	P	L	L	2014	0
15	G0	P	L	L	2014	0
15	G0	P	L	L	2014	0
15	G0	P	L	L	2014	1	0
15	G0	P	L	L	2014	1	1	0
15	G0	P	L	L	2014	0
15	G0	P	L	L	2014	0
15	G0	P	L	L	2014	0
15	G0	P	L	L	2014	0
15	G0	P	L	L	2014	0
15	G0	P	L	L	2014	1	1	0
15	G0	P	L	L	2014	1	1
15	G0	P	L	L	2014	0
15	G0	P	L	L	2014	1	1	1	0
15	G0	P	L	L	2014	1	0
15	G0	P	L	L	2014	1	1
15	G0	P	L	L	2014	1	0
15	G0	P	L	L	2014	1	1	0
15	G0	P	L	L	2014	0
15	G0	P	L	L	2014	1	1
15	G0	P	L	L	2014	0
15	G0	P	L	L	2014	1	1	1	1
15	G0	P	L	L	2014	0
15	G0	P	L	L	2014	1	0
15	G0	P	L	L	2014	1	1	1	0
15	G0	P	L	L	2014	1	1	1	0
15	G0	P	L	L	2014	1	0
15	G0	P	L	L	2014	0
16	G0	P	L	L	2014	0
16	G0	P	L	L	2014	0
16	G0	P	L	L	2014	1	0
16	G0	P	L	L	2014	0
16	G0	P	L	L	2014	0
16	G0	P	L	L	2014	0
16	G0	P	L	L	2014	0
16	G0	P	L	L	2014	1	0
16	G0	P	L	L	2014	0
16	G0	P	L	L	2014	0
16	G0	P	L	L	2014	0
16	G0	P	L	L	2014	0
16	G0	P	L	L	2014	0
16	G0	P	L	L	2014	0
16	G0	P	L	L	2014	0
16	G0	P	L	L	2014	1	1	1	1
16	G0	P	L	L	2014	1	1
16	G0	P	L	L	2014	0
16	G0	P	L	L	2014	0
16	G0	P	L	L	2014	0
16	G0	P	L	L	2014	0
16	G0	P	L	L	2014	0
16	G0	P	L	L	2014	0
16	G0	P	L	L	2014	0
16	G0	P	L	L	2014	1	1	1	1
16	G0	P	L	L	2014	0
16	G0	P	L	L	2014	0
16	G0	P	L	L	2014	0
16	G0	P	L	L	2014	1	1	1	1
16	G0	P	L	L	2014	0
16	G0	P	L	L	2014	0
16	G0	P	L	L	2014	0
16	G0	P	L	L	2014	0
16	G0	P	L	L	2014	0
16	G0	P	L	L	2014	0
16	G0	P	L	L	2014	0
16	G0	P	L	L	2014	0
16	G0	P	L	L	2014	0
16	G0	P	L	L	2014	0
16	G0	P	L	L	2014	0
16	G0	P	L	L	2014	1	1	1	1
16	G0	P	L	L	2014	0
16	G0	P	L	L	2014	0
16	G0	P	L	L	2014	1	0
16	G0	P	L	L	2014	0
16	G0	P	L	L	2014	0
[truncated: 2,231 more rows]

## Sheet: legend
	PLOT	Plot randomly
	YEAR	Study year
	E.	Early treatment
	L.	Late treatment
	EMERG	Seedling emergence
	E_SURV	Survival during the early treatment
	L_SURV	Survival during the late treatment
	REP_RAT	Reproductive individual rate
	CODE	Id matriline
	GEN	Generation
	g0	ancestral data
	ptr	data for testing transgenerational response
	o	Onobrychis viciifolia
	p	Papaver rhoeas
	rep	reproductive individual rate data
